# Supplementary material for: IceChrono1: a probabilistic model to compute a common and optimal chronology for several ice cores
Source: Copernicus journal article supplement (doi:10.5194/gmd-8-1473-2015), 2015-05-21
Supplement: Supplementary file 44 [file gmd-8-1473-2015-supplement.zip]

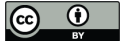

## *Supplement of*

# **IceChrono1: a probabilistic model to compute a common and optimal chronology for several ice cores**

**F. Parrenin et al.**

*Correspondence to:* F. Parrenin ([parrenin@ujf-grenoble.fr](mailto:parrenin@ujf-grenoble.fr))

- [gmd-8-1473-2015-supplement-cover-letter.pdf](#)
- AICC2012-VHR
  - AICC2012-VHR
  - EDC
    - \* AICC2012-age-60kyr.pdf
    - \* AICC2012-age.pdf
    - \* AICC2012-gage-60kyr.pdf
    - \* AICC2012-gage.pdf
    - \* AICC2012-official.txt
    - \* AICC2012.txt
    - \* Ddepth.pdf
    - \* Ddepth.txt
    - \* EDC
    - \* LID-prior.txt
    - \* LID.pdf
    - \* accu-prior.txt
    - \* accumulation.pdf
    - \* air\_age.pdf
    - \* air\_age.txt
    - \* air\_age\_intervals.txt
    - \* airlayerthick.pdf
    - \* comp-AICC2012.py
    - \* density-prior.txt
    - \* ice\_age.pdf
    - \* ice\_age.txt
    - \* ice\_age\_intervals.txt
    - \* icelayerthick.pdf

- \* output.txt
- \* parameters.py
- \* restart.txt
- \* sigma-display.py
- \* thinning-prior.txt
- \* thinning.pdf
- EDC-EDML
  - \* EDC-EDML
  - \* air-air.pdf
  - \* air-ice.pdf
  - \* air\_depth.txt
  - \* airice\_depth.txt
  - \* ice-air.pdf
  - \* ice-ice.pdf
  - \* ice\_depth-save.txt
  - \* ice\_depth.txt
  - \* ice\_depth2.txt
  - \* iceair\_depth.txt
- EDC-NGRIP
  - \* EDC-NGRIP
  - \* air-air.pdf
  - \* air-ice.pdf
  - \* air\_depth.txt
  - \* ice-air.pdf
  - \* ice-ice.pdf
  - \* ice\_depth.txt
- EDC-TALDICE
  - \* EDC-TALDICE
  - \* air-air.pdf
  - \* air-ice.pdf
  - \* air\_depth.txt
  - \* airice\_depth.txt
  - \* ice-air.pdf
  - \* ice-ice.pdf
  - \* ice\_depth.txt
  - \* ice\_depth.txt-AICC2012
  - \* ice\_depth.txt.test
  - \* iceair\_depth.txt
- EDC-VK
  - \* EDC-VK
  - \* air-air.pdf
  - \* air-ice.pdf
  - \* air\_depth.txt
  - \* airice\_depth.txt
  - \* ice-air.pdf
  - \* ice-ice.pdf

- \* ice\_depth.txt
- \* iceair\_depth.txt
- EDML
  - \* Ddepth.pdf
  - \* EDML
  - \* LID-prior.txt
  - \* LID.pdf
  - \* accu-prior.txt
  - \* accumulation.pdf
  - \* air\_age.pdf
  - \* air\_age\_intervals.txt
  - \* airlayerthick.pdf
  - \* density-prior.txt
  - \* ice\_age.pdf
  - \* ice\_age\_intervals.txt
  - \* icelayerthick.pdf
  - \* output.txt
  - \* parameters.py
  - \* restart.txt
  - \* thinning-prior.txt
  - \* thinning.pdf
- EDML-NGRIP
  - \* EDML-NGRIP
  - \* air-air.pdf
  - \* air-ice.pdf
  - \* air\_depth.txt
  - \* ice-air.pdf
  - \* ice-ice.pdf
  - \* ice\_depth.txt
- NGRIP
  - \* Ddepth.pdf
  - \* Ddepth.txt
  - \* LID-prior.txt
  - \* LID.pdf
  - \* NGRIP
  - \* accu-prior.txt
  - \* accumulation.pdf
  - \* air\_age.pdf
  - \* air\_age\_intervals.txt
  - \* airlayerthick.pdf
  - \* density-prior.txt
  - \* ice\_age.pdf
  - \* ice\_age.txt
  - \* icelayerthick.pdf
  - \* output.txt
  - \* parameters.py
  - \* restart.txt

- \* thinning-prior.txt
- \* thinning.pdf
- TALDICE
  - \* Ddepth.pdf
  - \* LID-prior.txt
  - \* LID.pdf
  - \* TALDICE
  - \* accu-prior.txt
  - \* accumulation.pdf
  - \* air\_age-BuironCP2011.txt
  - \* air\_age.pdf
  - \* air\_age\_intervals.txt
  - \* airlayerthick.pdf
  - \* density-prior.txt
  - \* ice\_age.pdf
  - \* ice\_age\_intervals.txt
  - \* icelayerthick.pdf
  - \* isotopes.txt
  - \* output.txt
  - \* parameters.py
  - \* restart.txt
  - \* thinning-prior.txt
  - \* thinning.pdf
  - \* udepth.txt.orig
- TALDICE-EDML
  - \* TALDICE-EDML
  - \* air-air.pdf
  - \* air-ice.pdf
  - \* air\_depth.txt
  - \* airice\_depth.txt
  - \* ice-air.pdf
  - \* ice-ice.pdf
  - \* iceair\_depth.txt
- TALDICE-NGRIP
  - \* TALDICE-NGRIP
  - \* air-air.pdf
  - \* air-ice.pdf
  - \* air\_depth.txt
  - \* ice-air.pdf
  - \* ice-ice.pdf
- VK
  - \* Ddepth.pdf
  - \* LID-prior.txt
  - \* LID.pdf
  - \* VK
  - \* accu-prior.txt

- \* accumulation.pdf
- \* air\_age.pdf
- \* air\_age.txt
- \* air\_age\_intervals.txt
- \* airlayerthick.pdf
- \* density-prior.txt
- \* ice\_age.pdf
- \* ice\_age.txt
- \* ice\_age\_intervals.txt
- \* icelayerthick.pdf
- \* output.txt
- \* parameters.py
- \* restart.txt
- \* sigma-display.py
- \* thinning-prior.txt
- \* thinning.pdf
- VK-EDML
  - \* VK-EDML
  - \* air-air.pdf
  - \* air-ice.pdf
  - \* airice\_depth.txt
  - \* ice-air.pdf
  - \* ice-ice.pdf
  - \* iceair\_depth.txt
- VK-NGRIP
  - \* VK-NGRIP
  - \* air-air.pdf
  - \* air-ice.pdf
  - \* air\_depth.txt
  - \* ice-air.pdf
  - \* ice-ice.pdf
- VK-TALDICE
  - \* VK-TALDICE
  - \* air-air.pdf
  - \* air-ice.pdf
  - \* air\_depth.txt
  - \* airice\_depth.txt
  - \* ice-air.pdf
  - \* ice-ice.pdf
  - \* iceair\_depth.txt
- output.txt
- parameters-AllDrillings.py
- parameters-CovariancePrior-AllDrillings-init.py
- parameters.py
- IceChrono

- Clean.py
- IceChrono.py
- IceChronoClasses.py
- LICENSE
- README.md

The copyright of individual parts of the supplement might differ from the CC-BY 3.0 licence.
