# Supplementary figures and images for: IceChrono1: a probabilistic model to compute a common and optimal chronology for several ice cores
Source: Copernicus journal article supplement (doi:10.5194/gmd-8-1473-2015), 2015-05-21

# TALDICE thinning

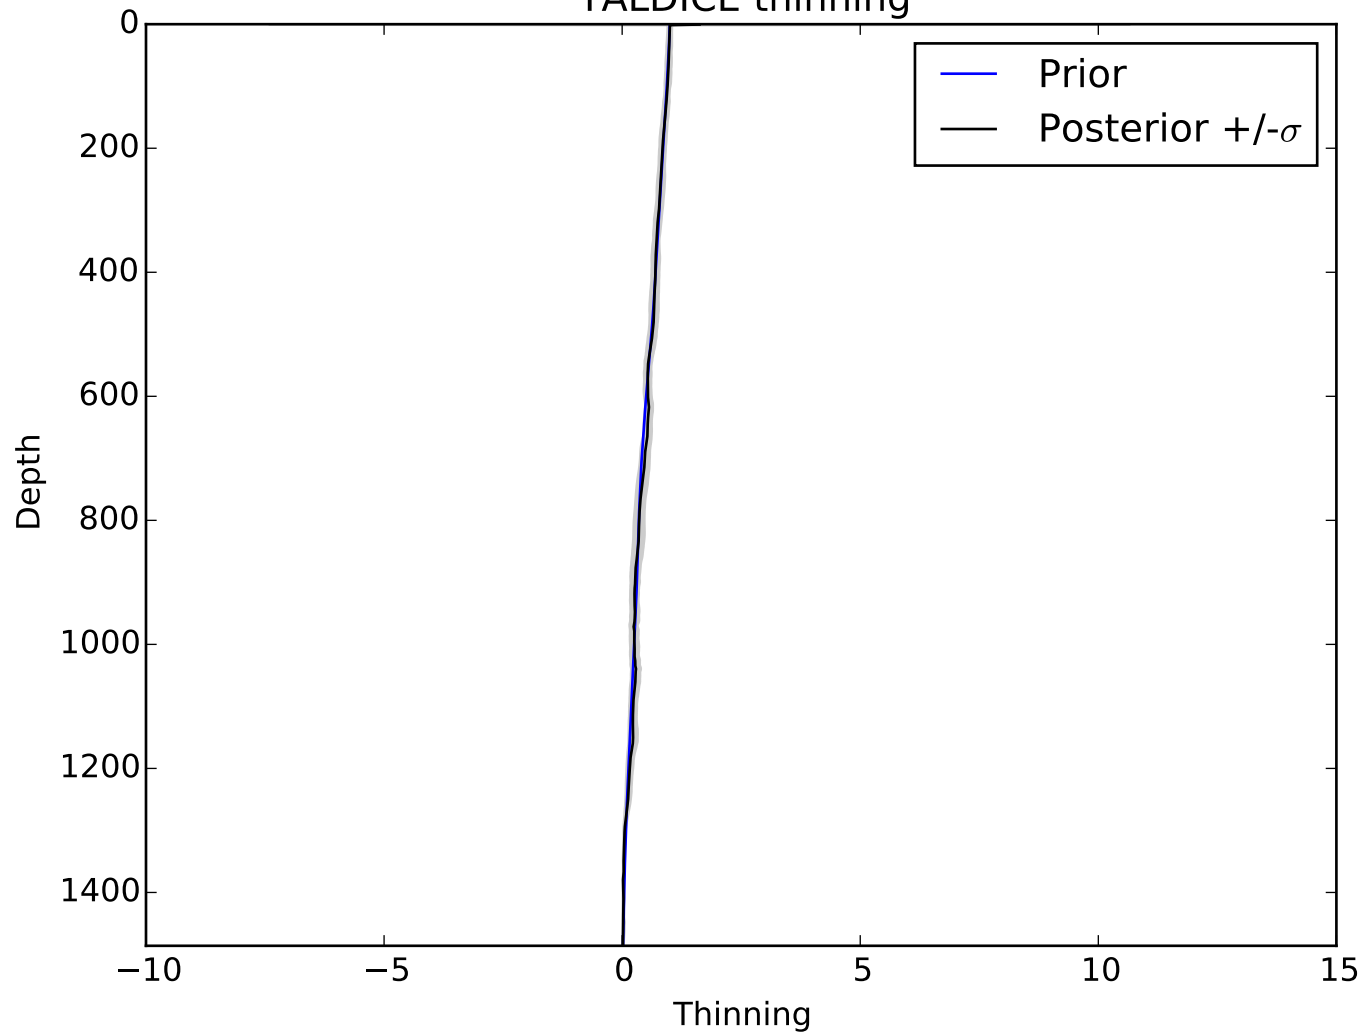

Supplement: Supplementary file 1 [file gmd-8-1473-2015-supplement.zip]

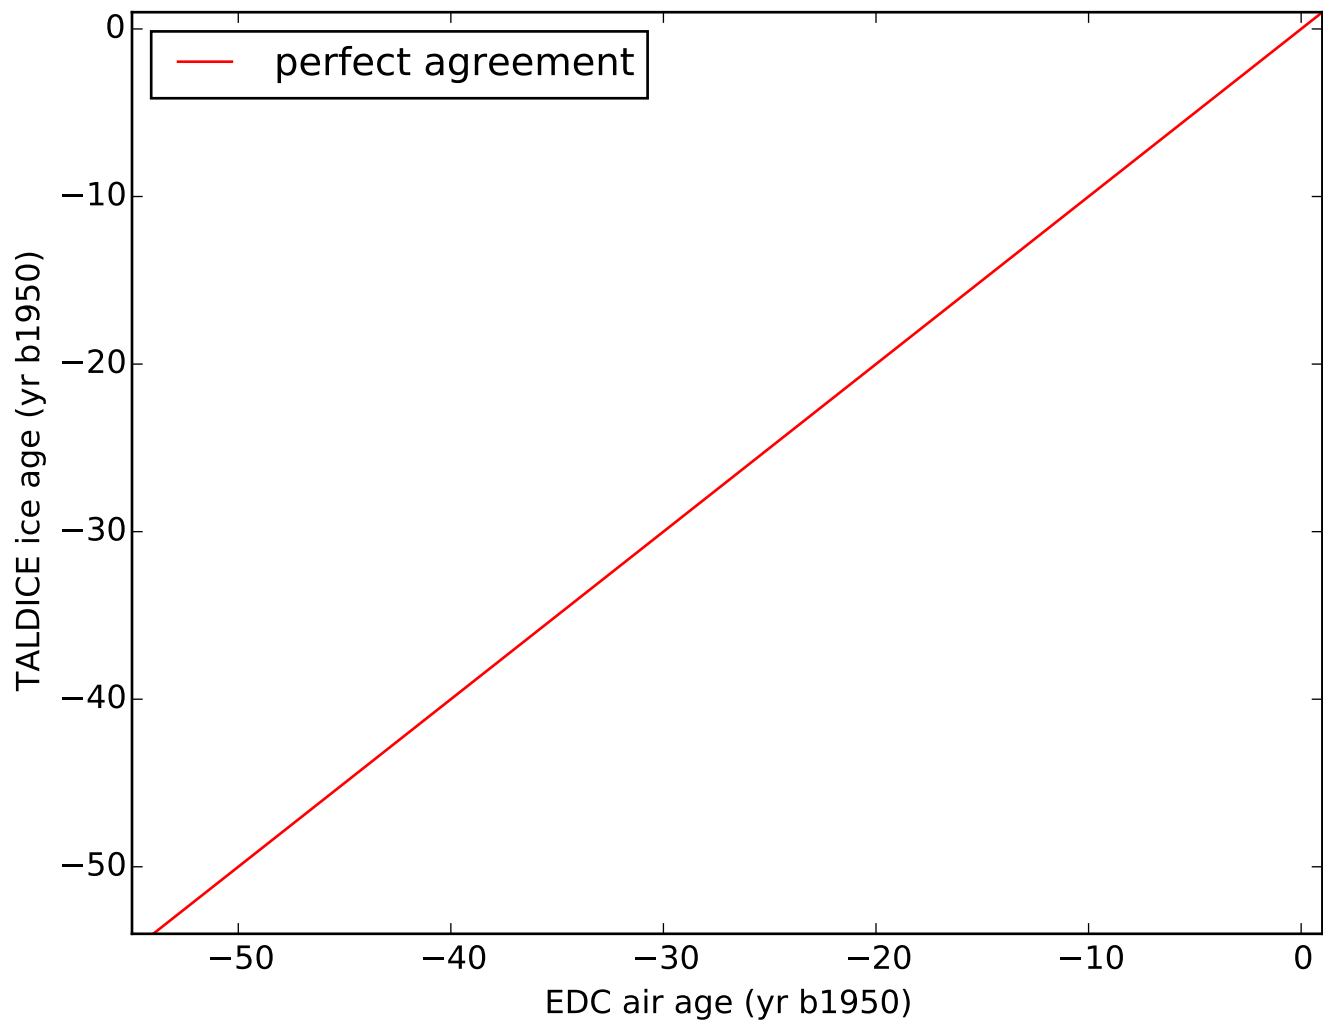

Supplement: Supplementary file 3 [file gmd-8-1473-2015-supplement.zip]

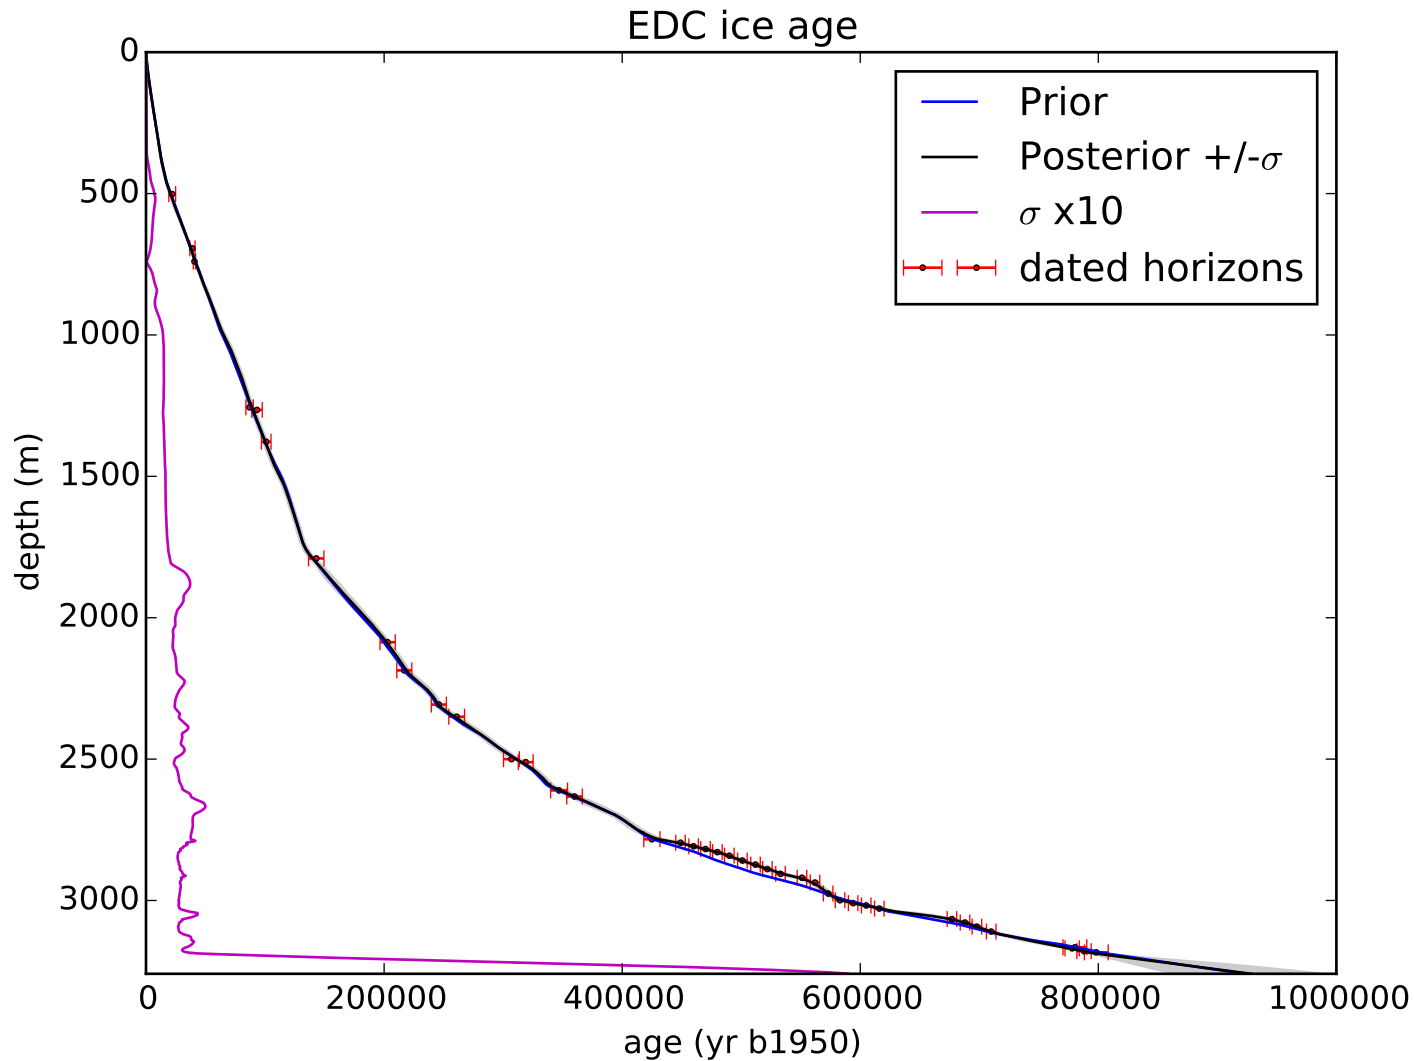

Supplement: Supplementary file 4 [file gmd-8-1473-2015-supplement.zip]

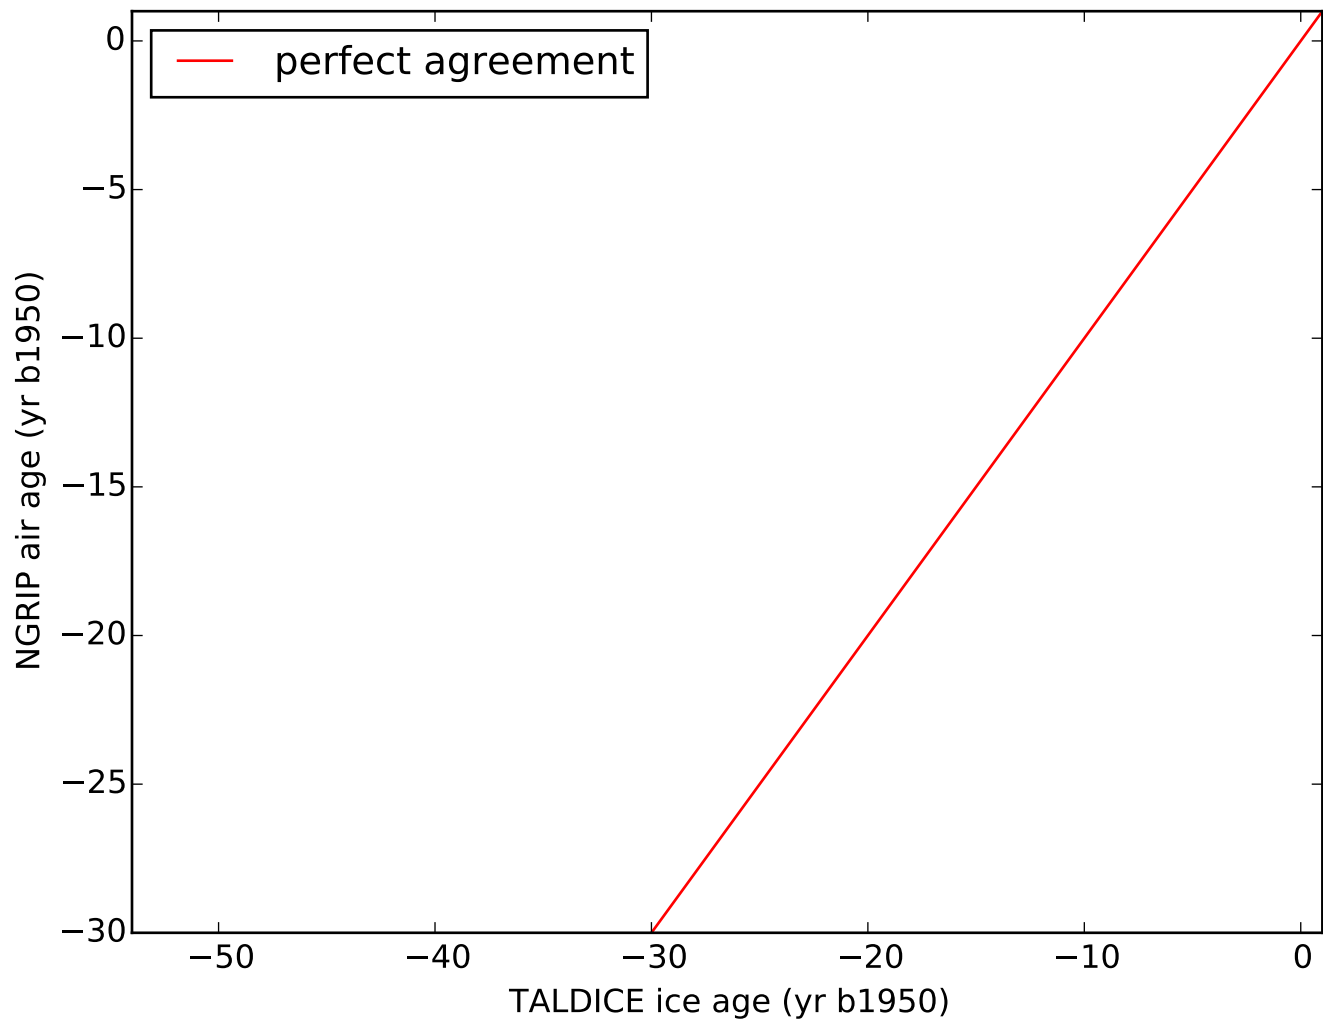

Supplement: Supplementary file 5 [file gmd-8-1473-2015-supplement.zip]

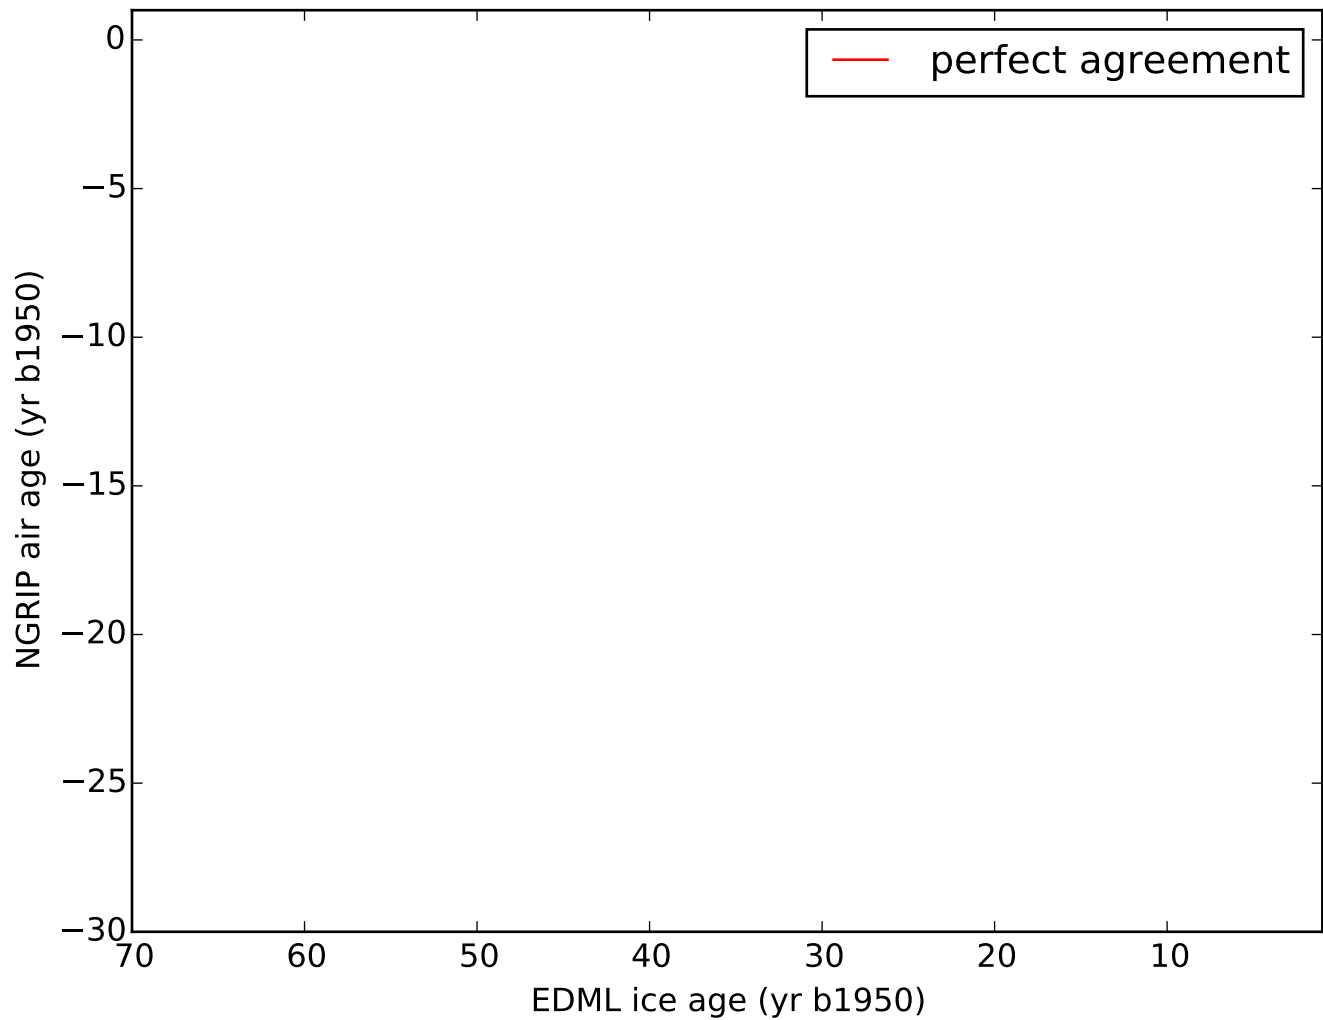

Supplement: Supplementary file 6 [file gmd-8-1473-2015-supplement.zip]

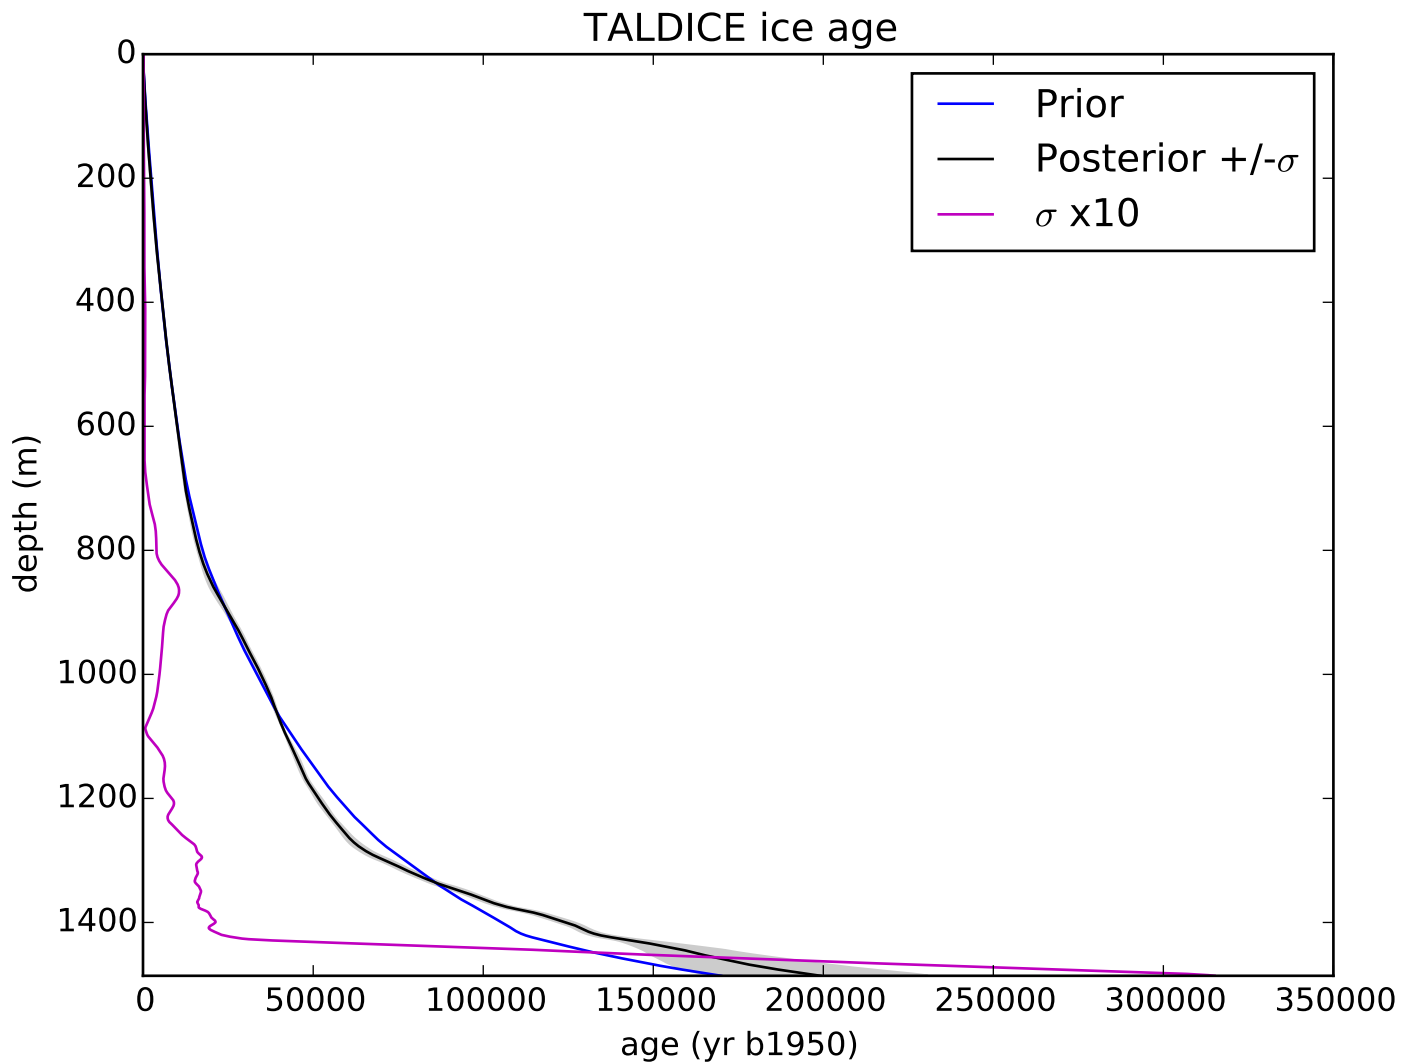

Supplement: Supplementary file 7 [file gmd-8-1473-2015-supplement.zip]

# NGRIP ice layer thickness

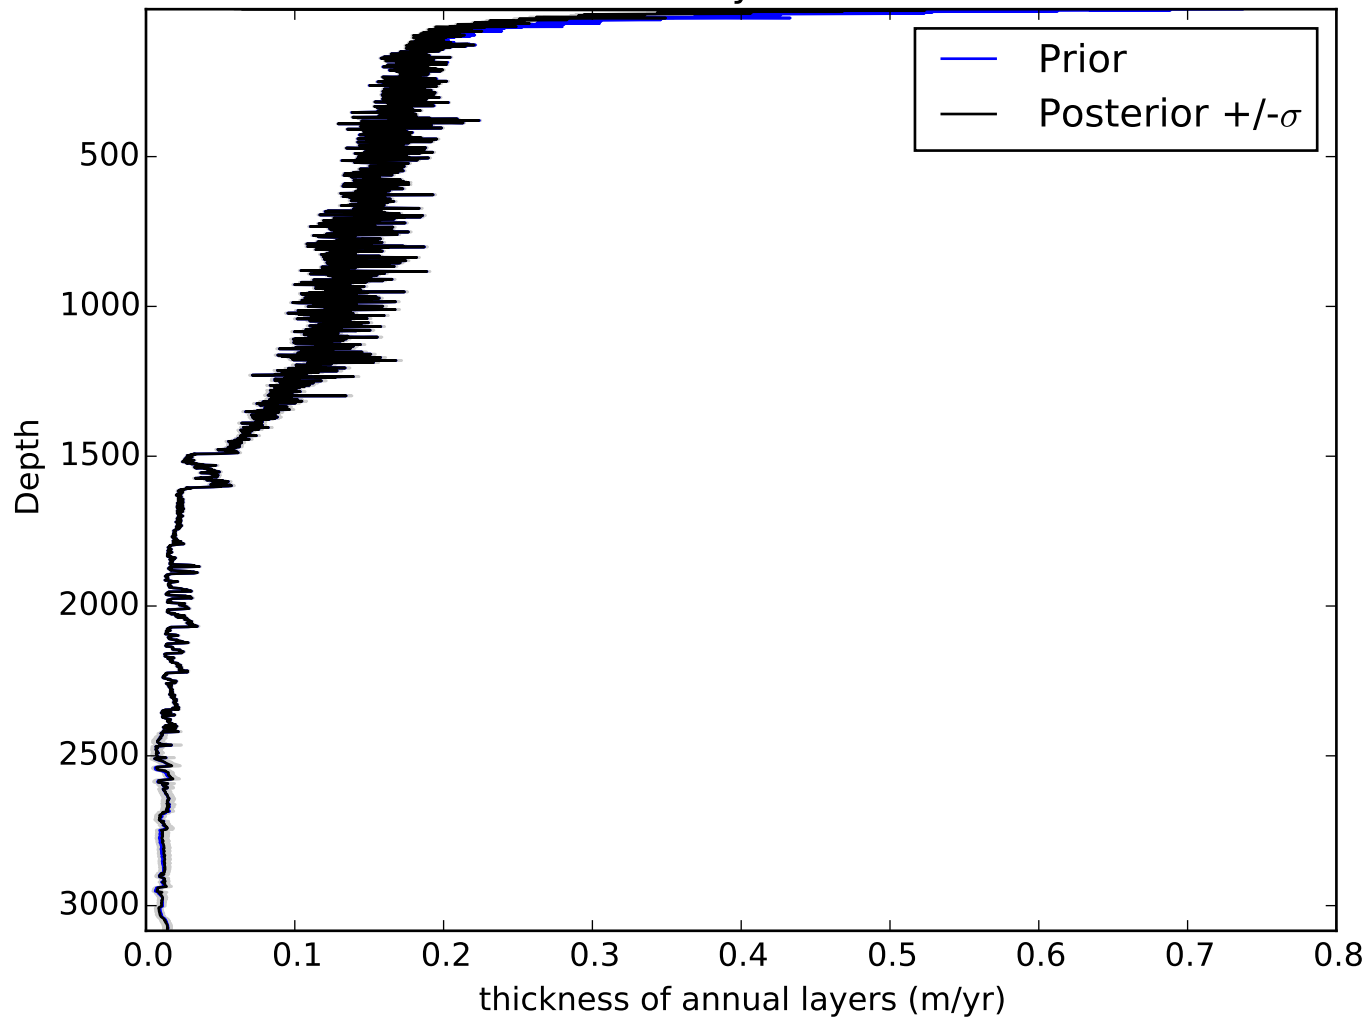

Supplement: Supplementary file 8 [file gmd-8-1473-2015-supplement.zip]

# NGRIP thinning

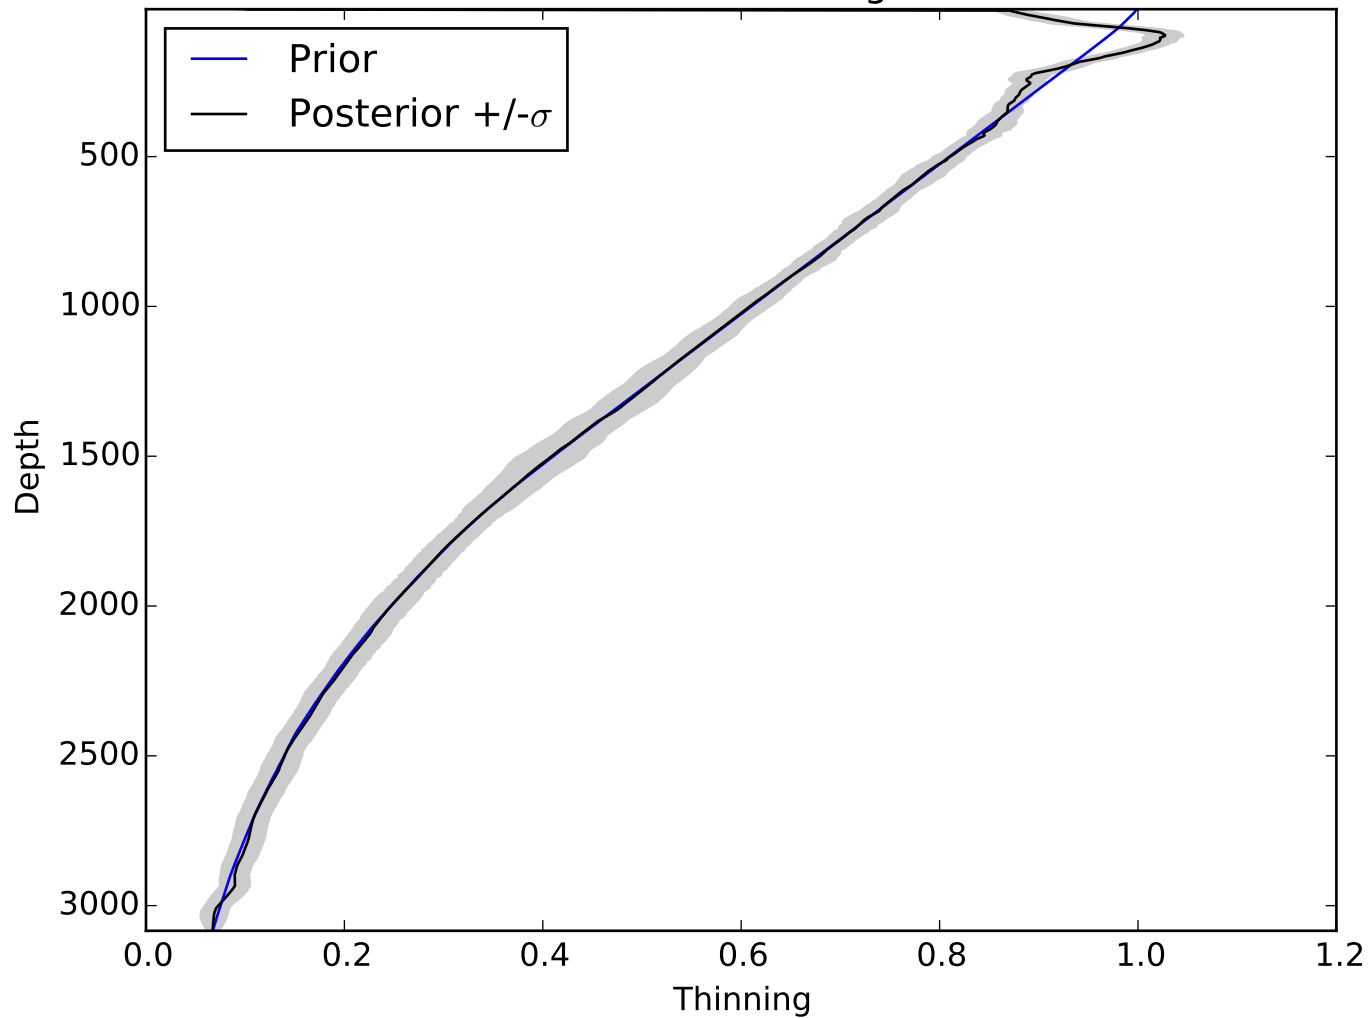

Supplement: Supplementary file 9 [file gmd-8-1473-2015-supplement.zip]

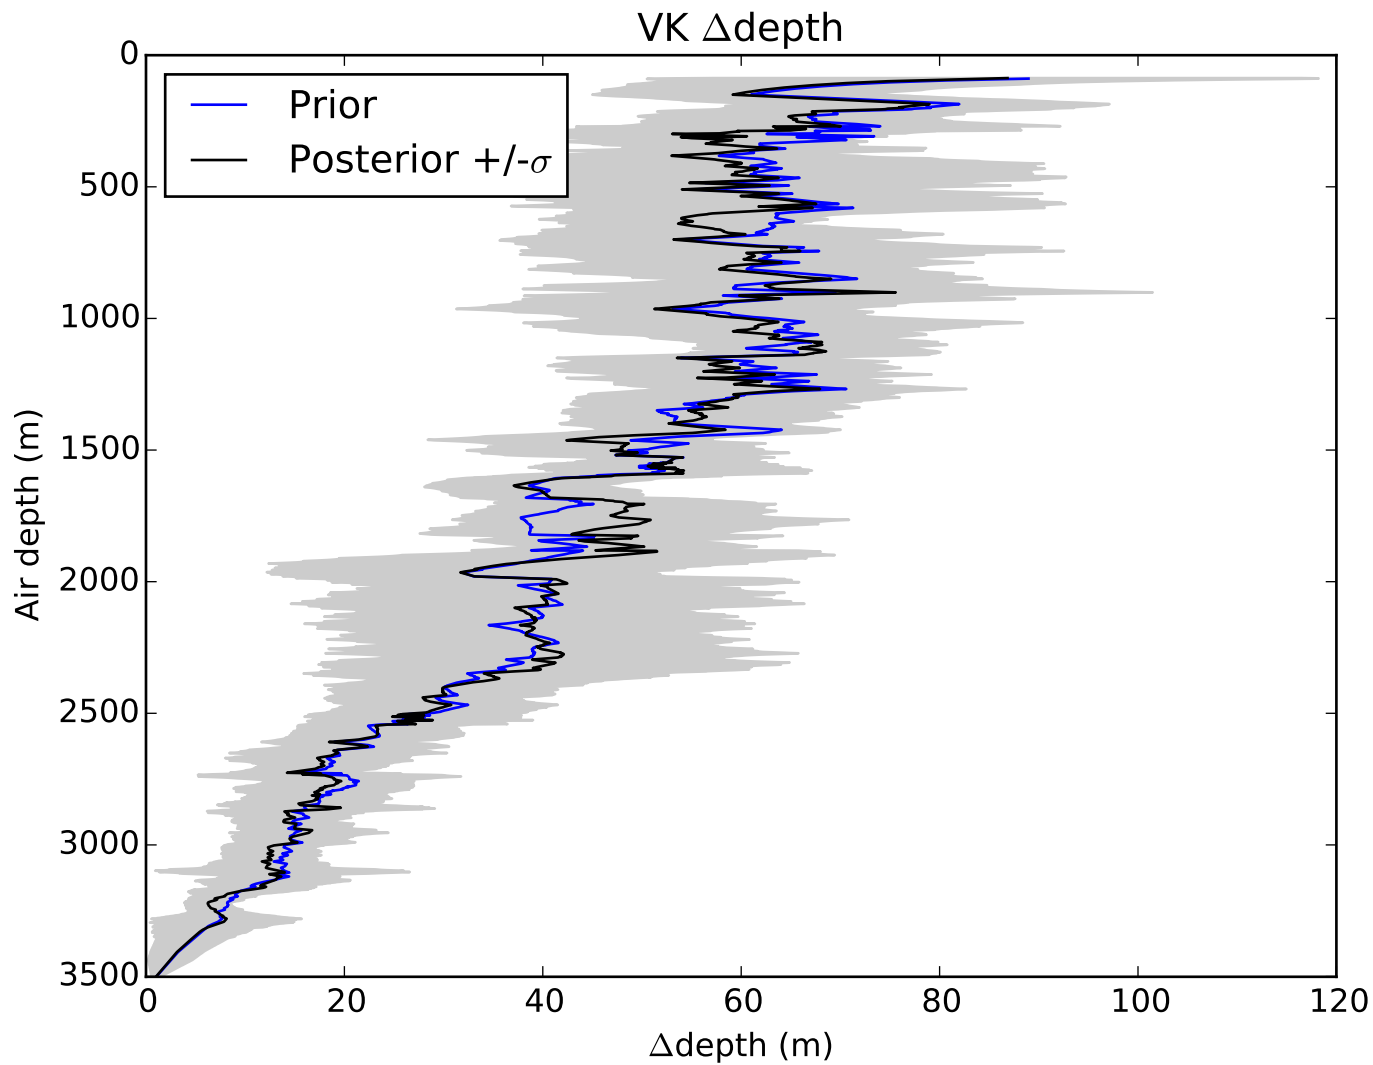

Supplement: Supplementary file 10 [file gmd-8-1473-2015-supplement.zip]

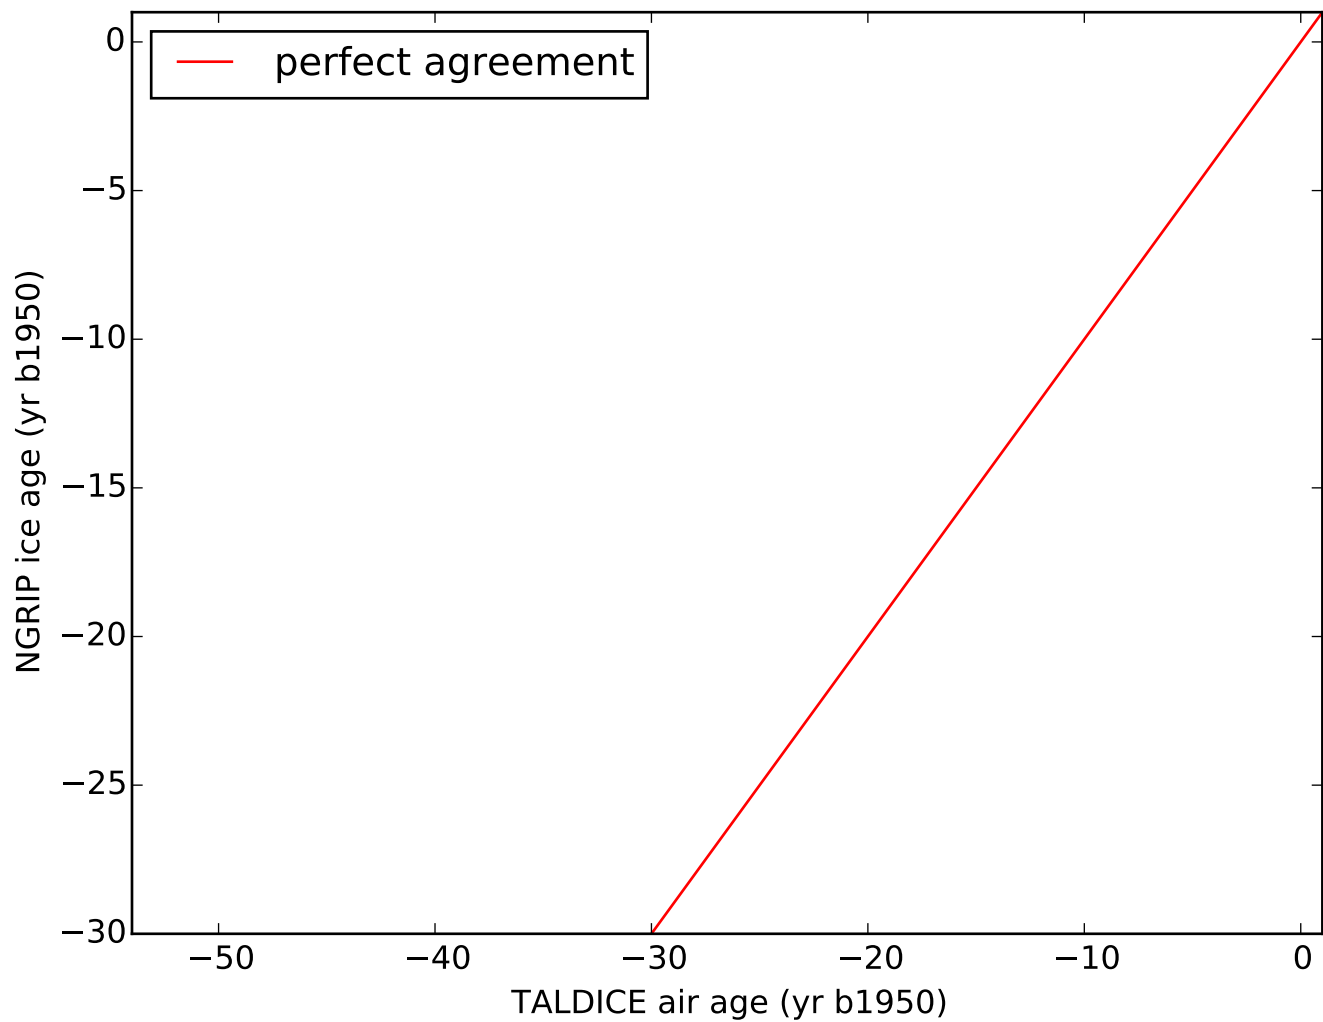

Supplement: Supplementary file 11 [file gmd-8-1473-2015-supplement.zip]

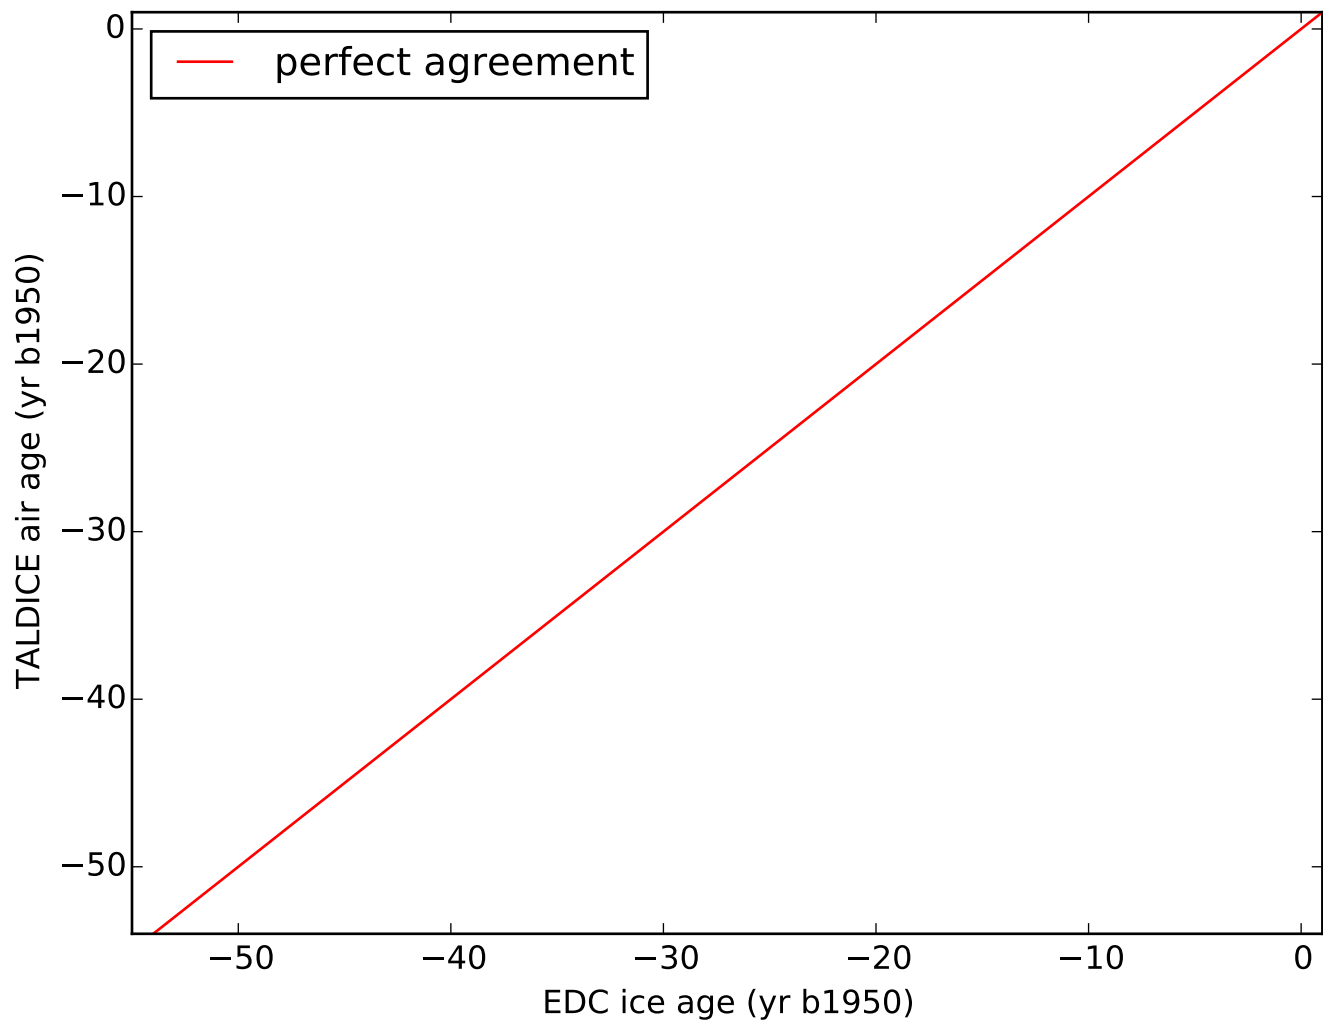

Supplement: Supplementary file 12 [file gmd-8-1473-2015-supplement.zip]

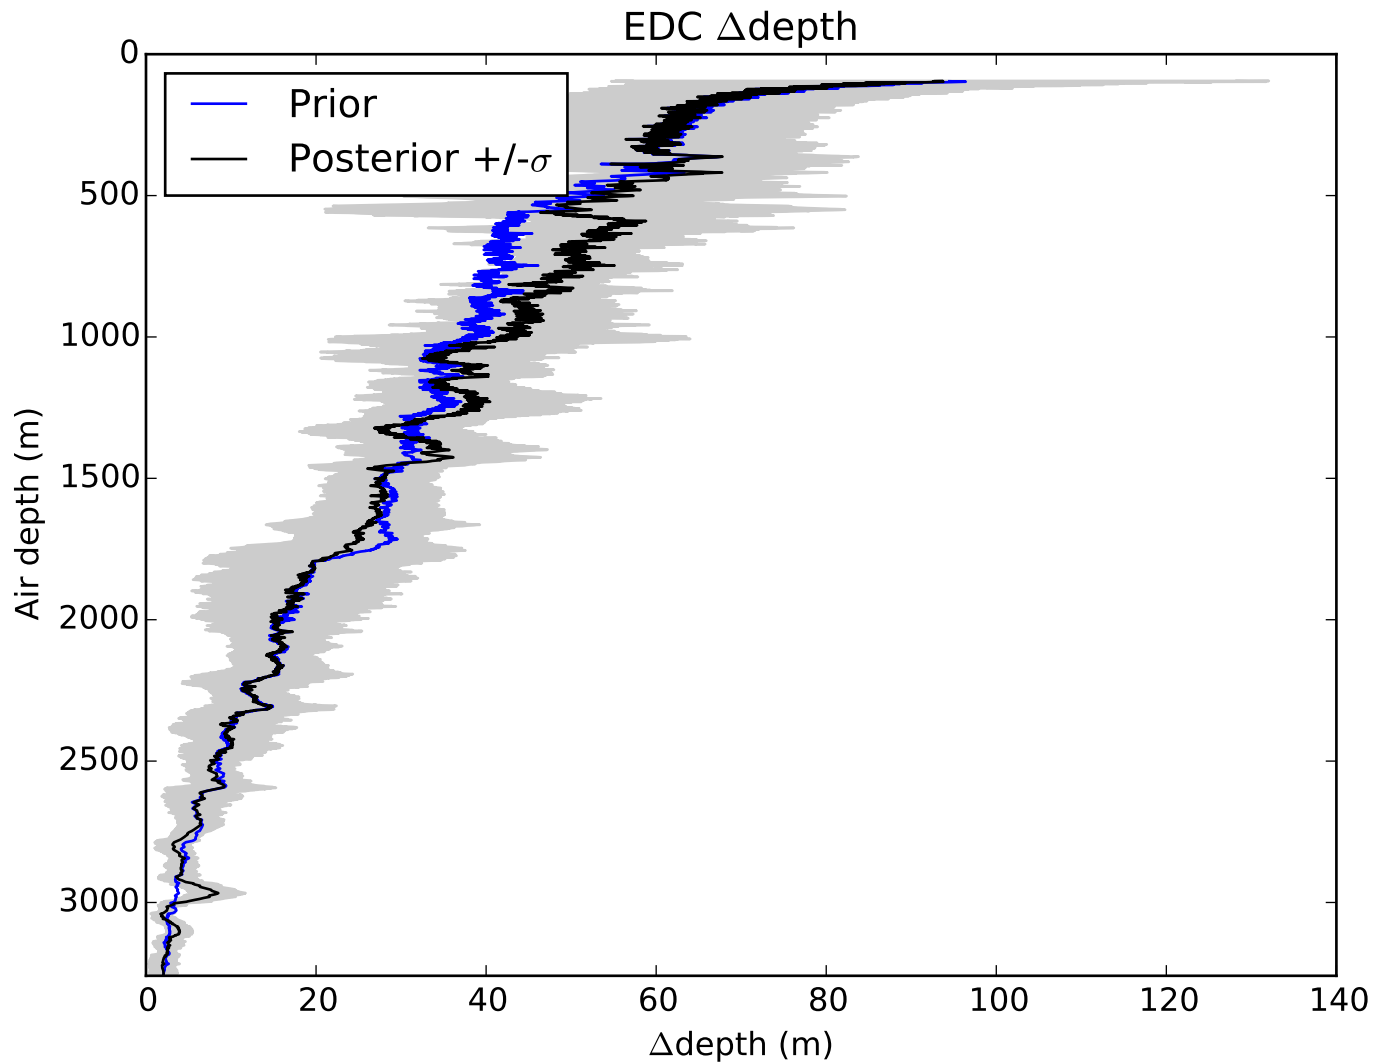

Supplement: Supplementary file 13 [file gmd-8-1473-2015-supplement.zip]

# EDML accumulation

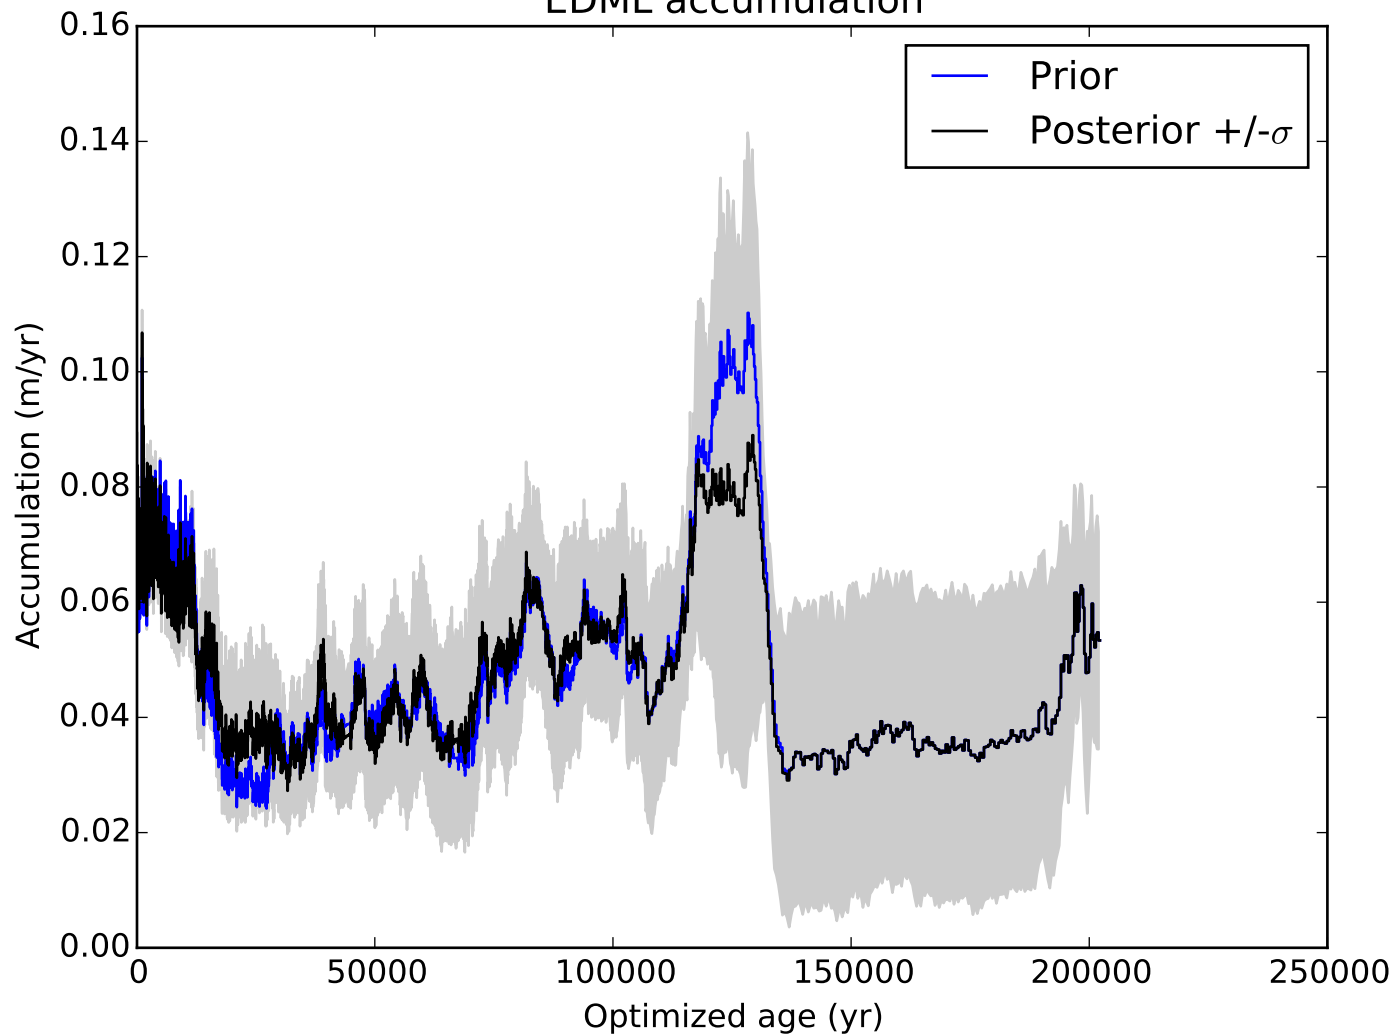

Supplement: Supplementary file 14 [file gmd-8-1473-2015-supplement.zip]

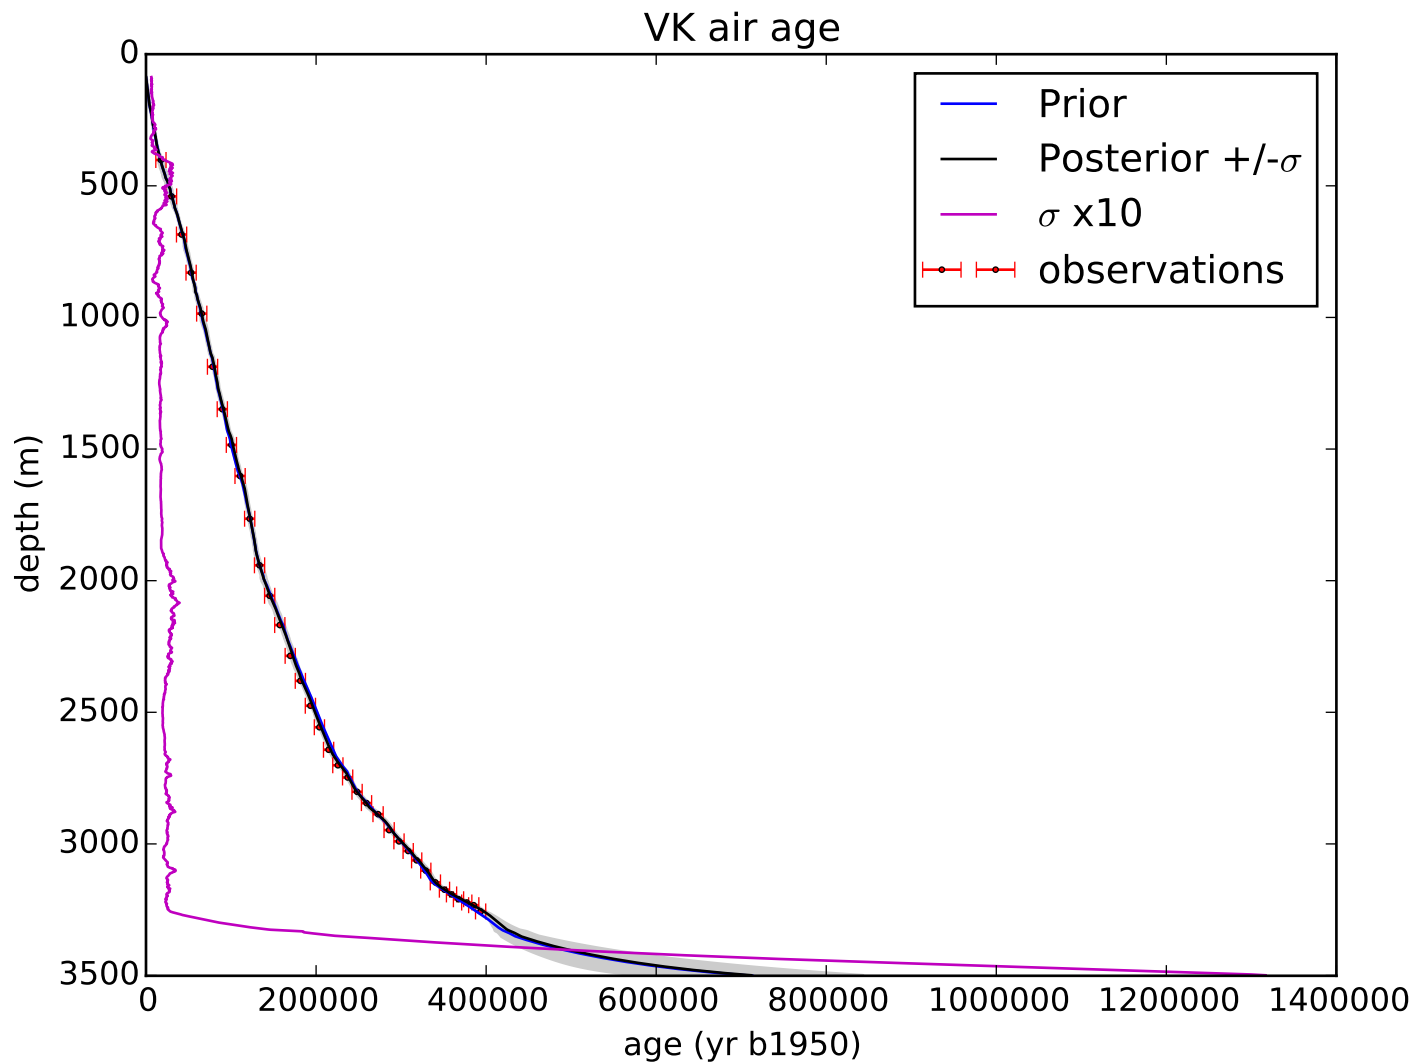

Supplement: Supplementary file 15 [file gmd-8-1473-2015-supplement.zip]

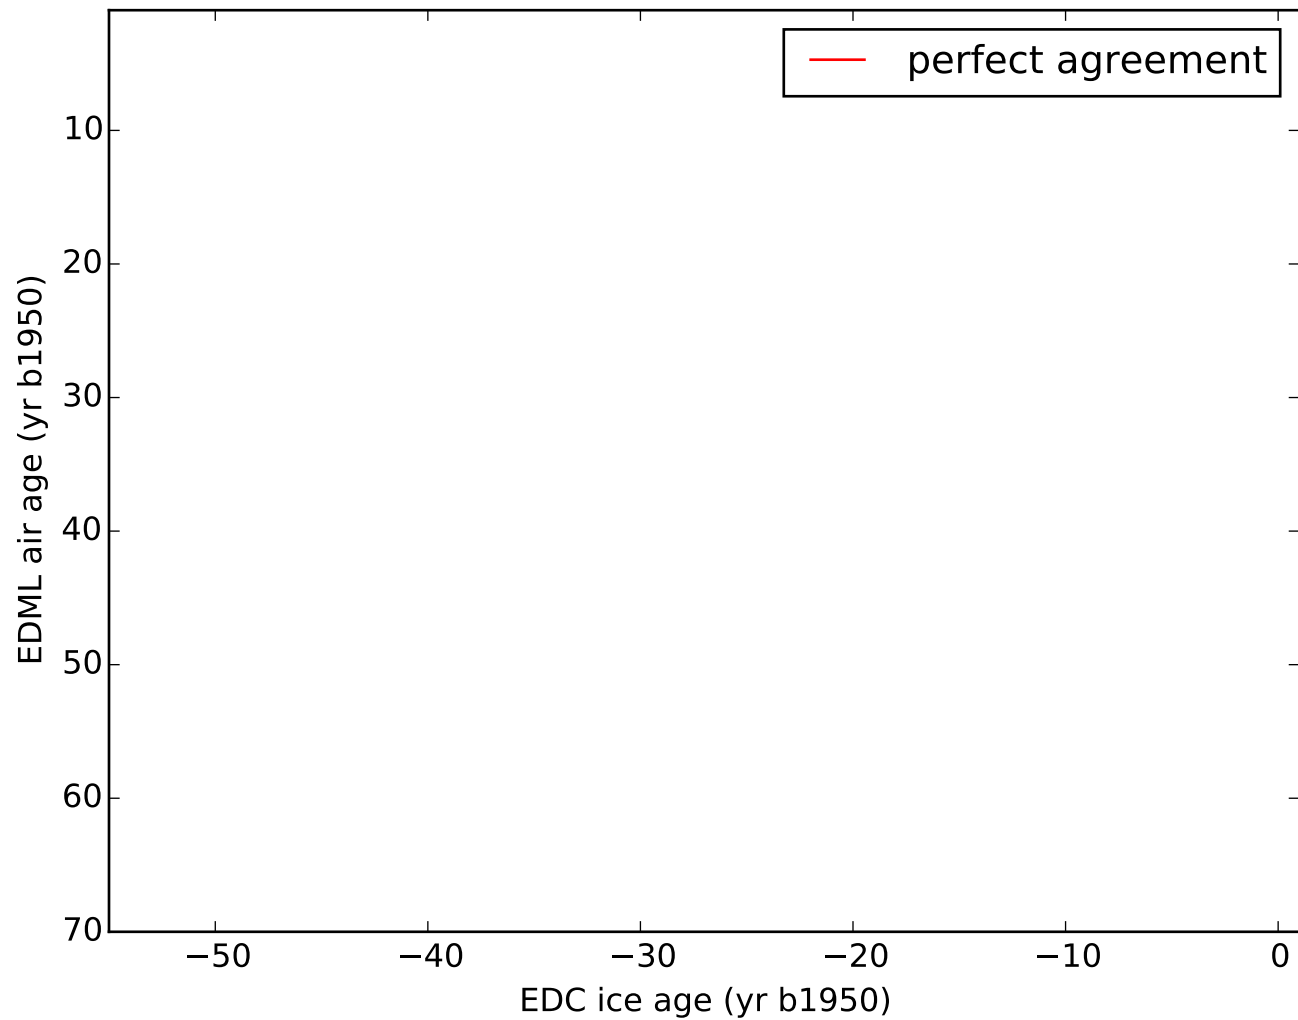

Supplement: Supplementary file 16 [file gmd-8-1473-2015-supplement.zip]

# EDC LID

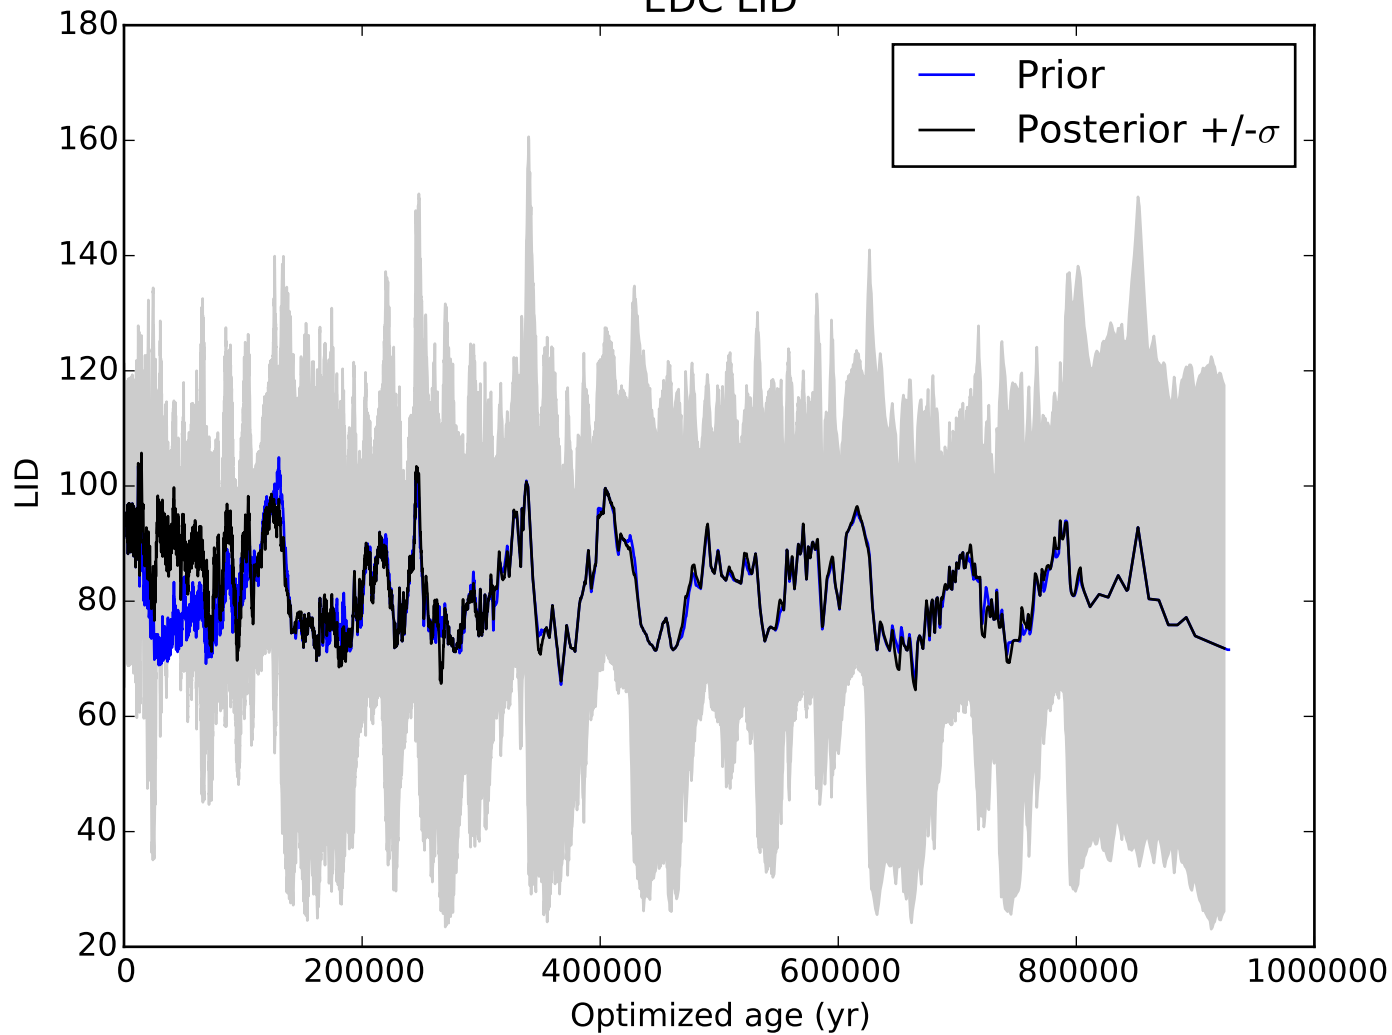

Supplement: Supplementary file 17 [file gmd-8-1473-2015-supplement.zip]

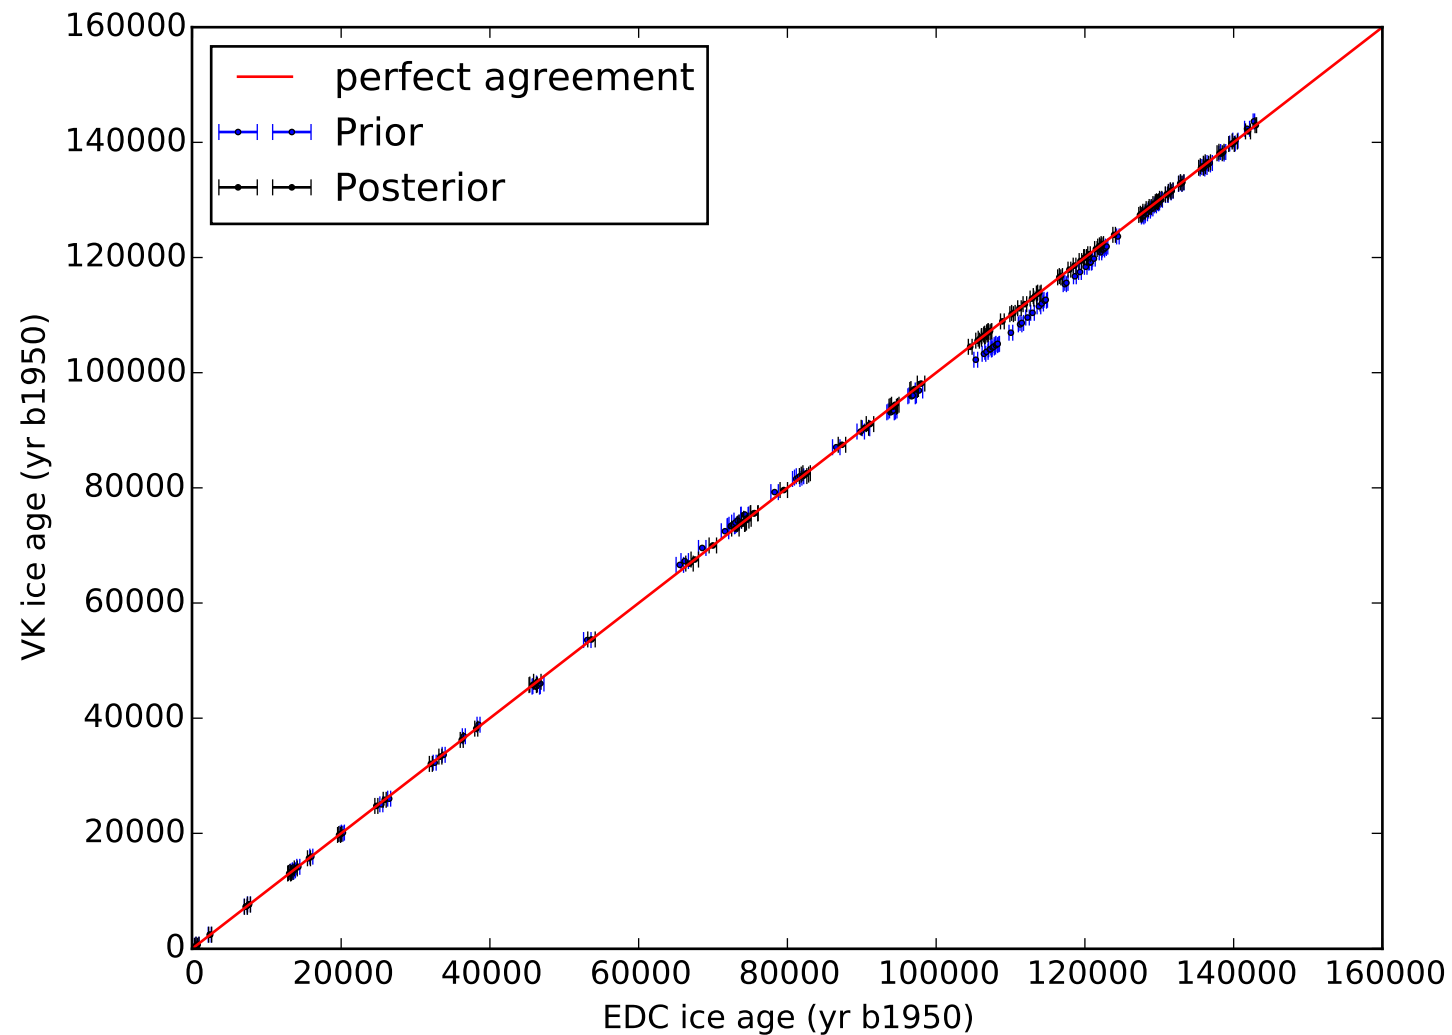

Supplement: Supplementary file 18 [file gmd-8-1473-2015-supplement.zip]

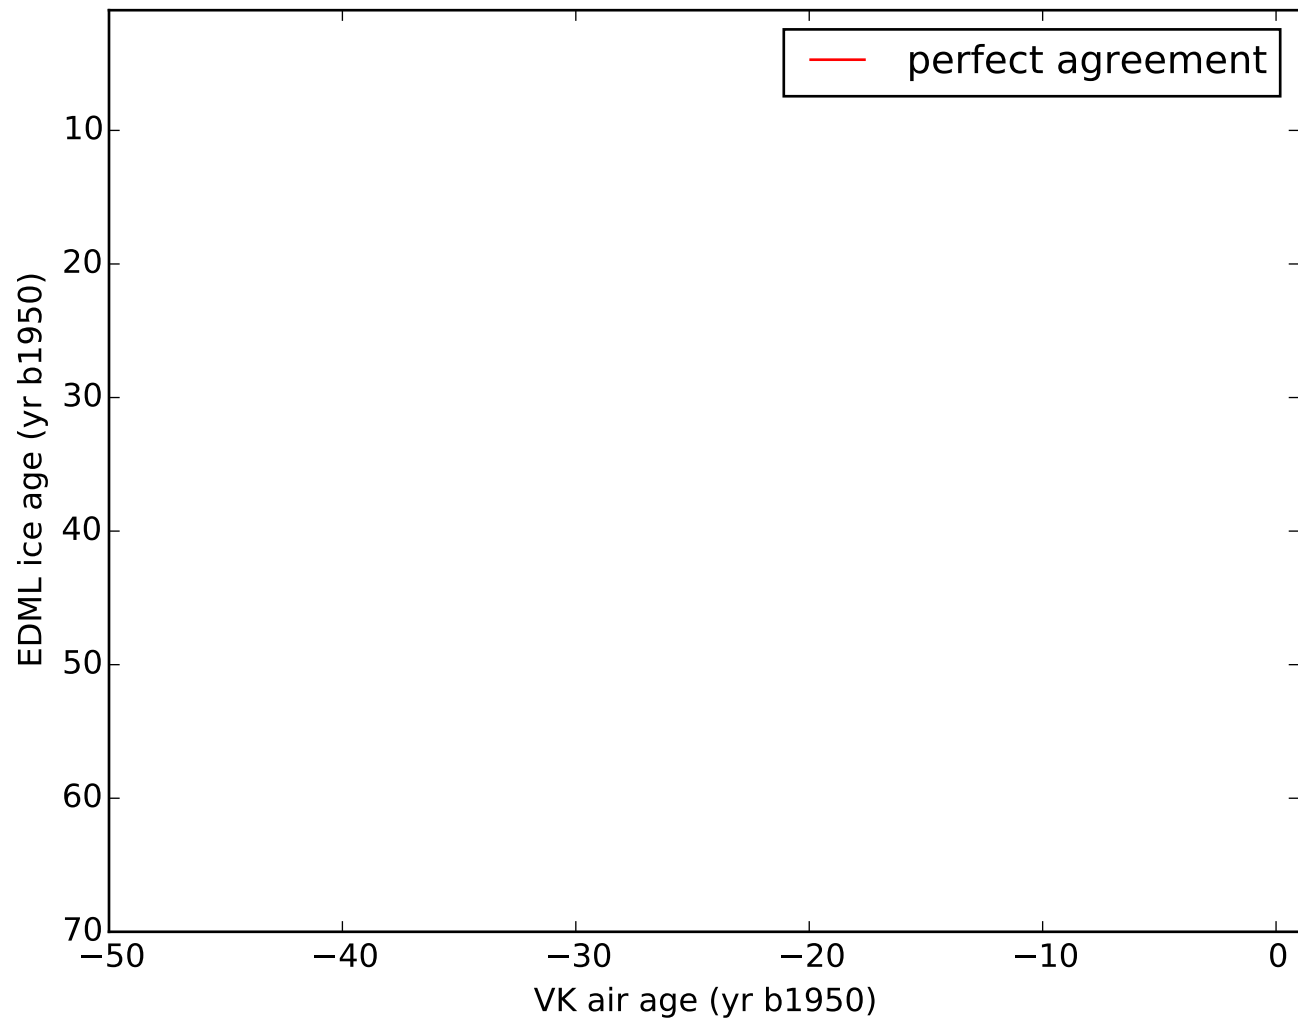

Supplement: Supplementary file 19 [file gmd-8-1473-2015-supplement.zip]

# TALDICE LID

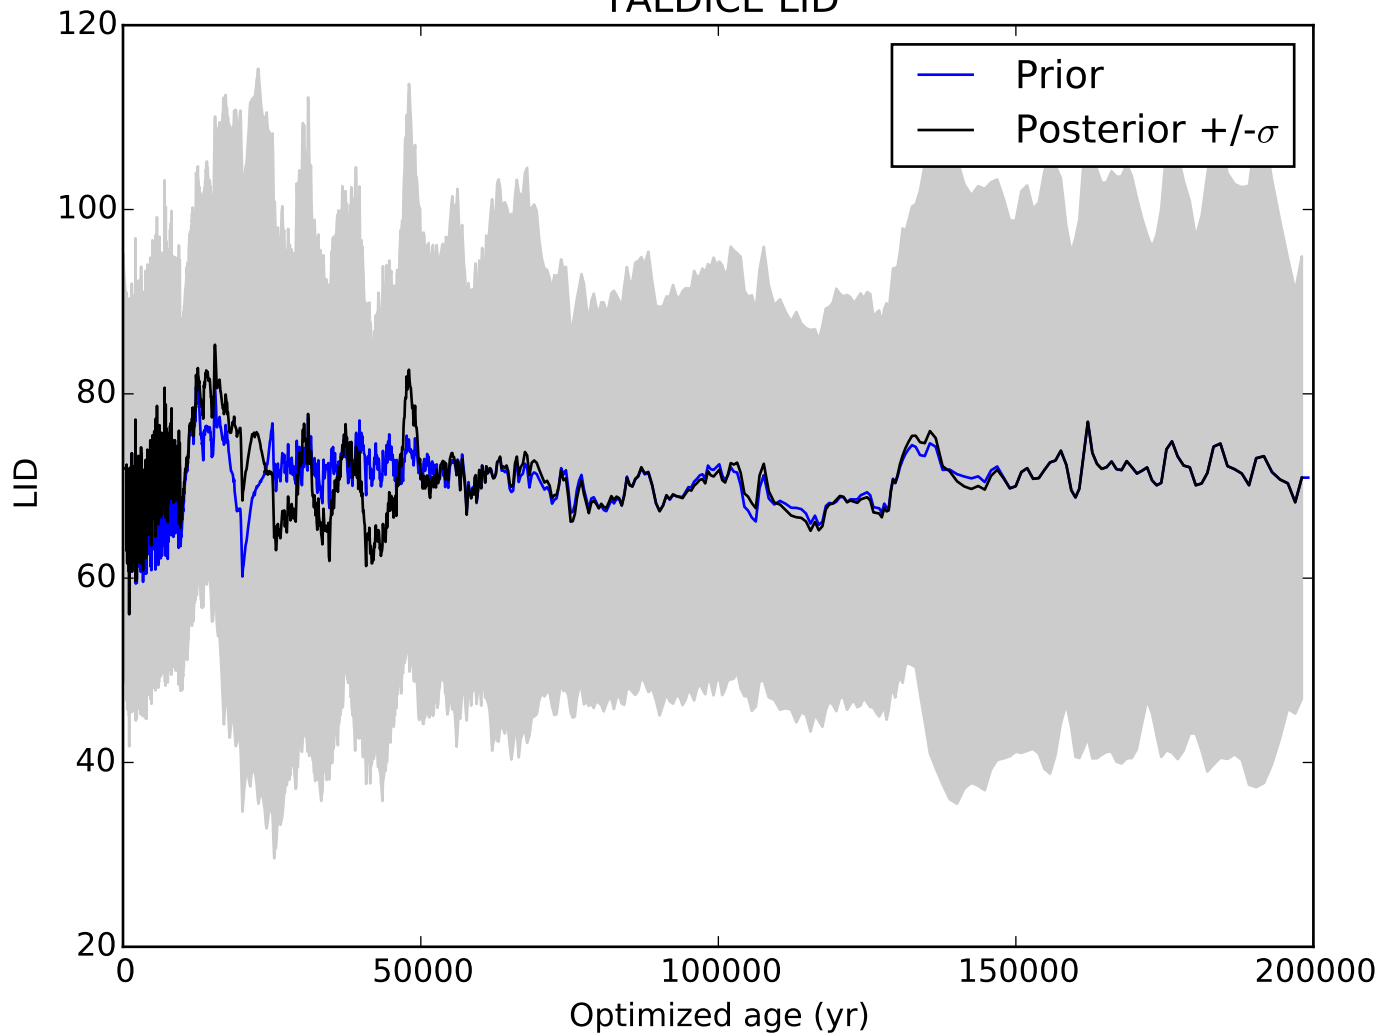

Supplement: Supplementary file 20 [file gmd-8-1473-2015-supplement.zip]

# EDML LID

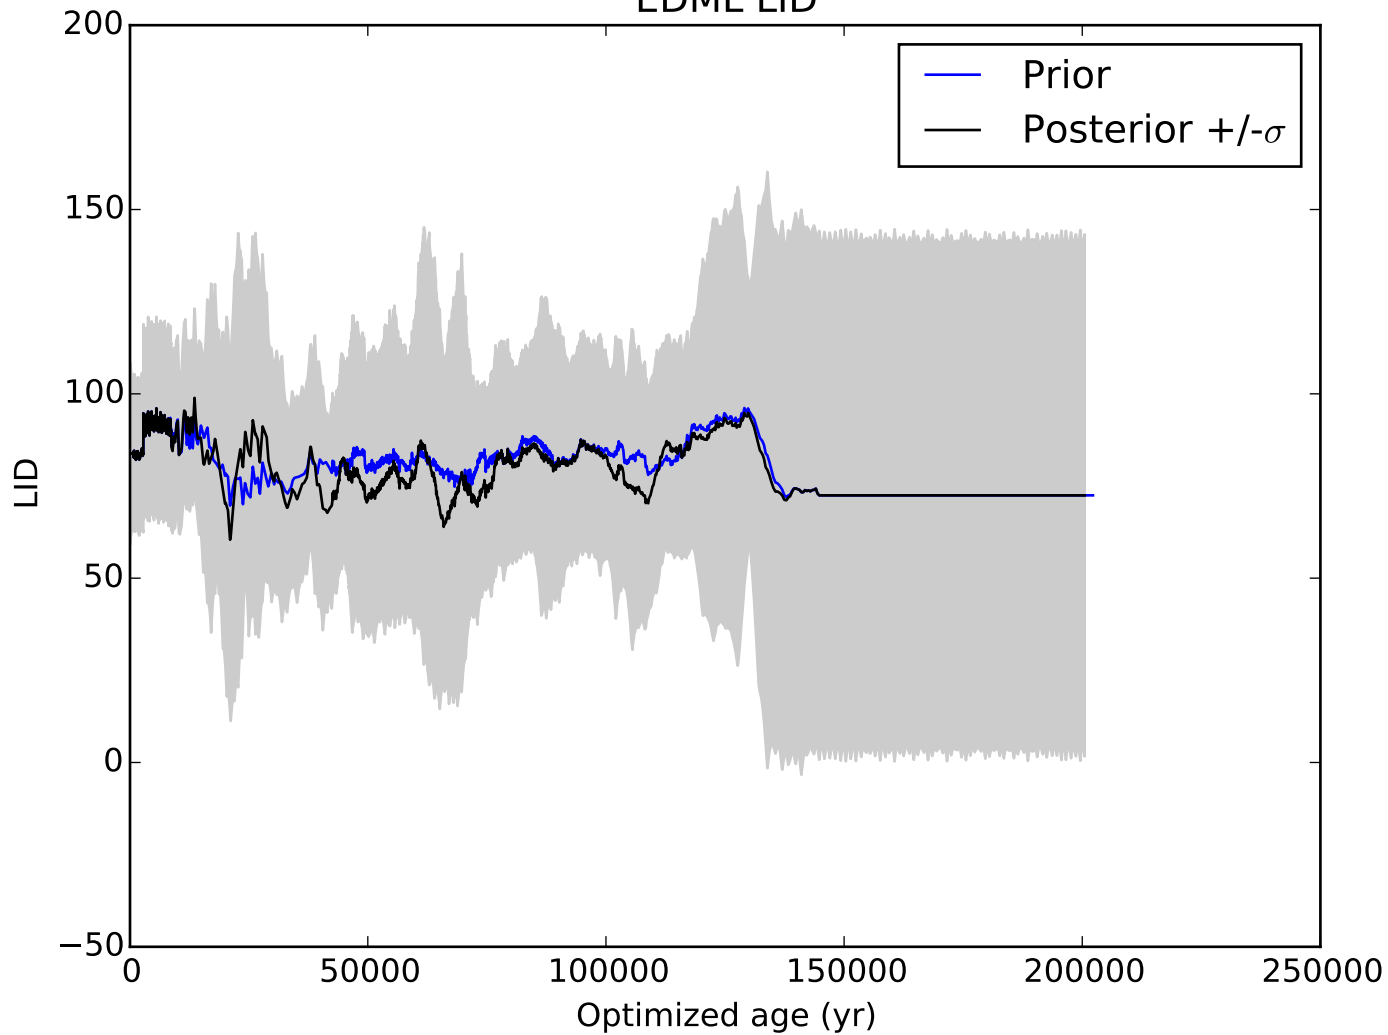

Supplement: Supplementary file 21 [file gmd-8-1473-2015-supplement.zip]

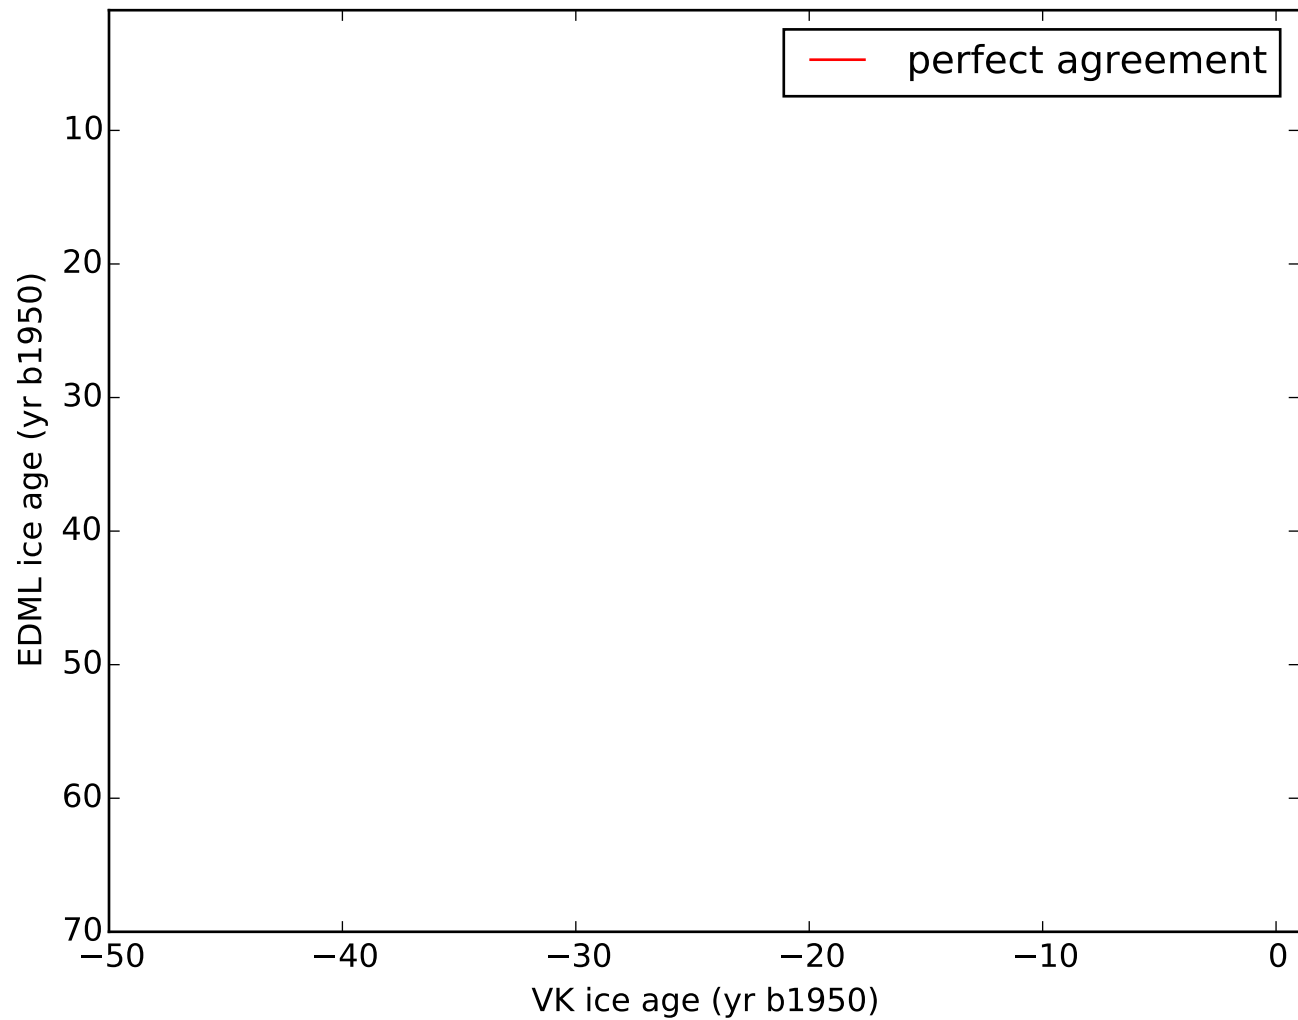

Supplement: Supplementary file 22 [file gmd-8-1473-2015-supplement.zip]

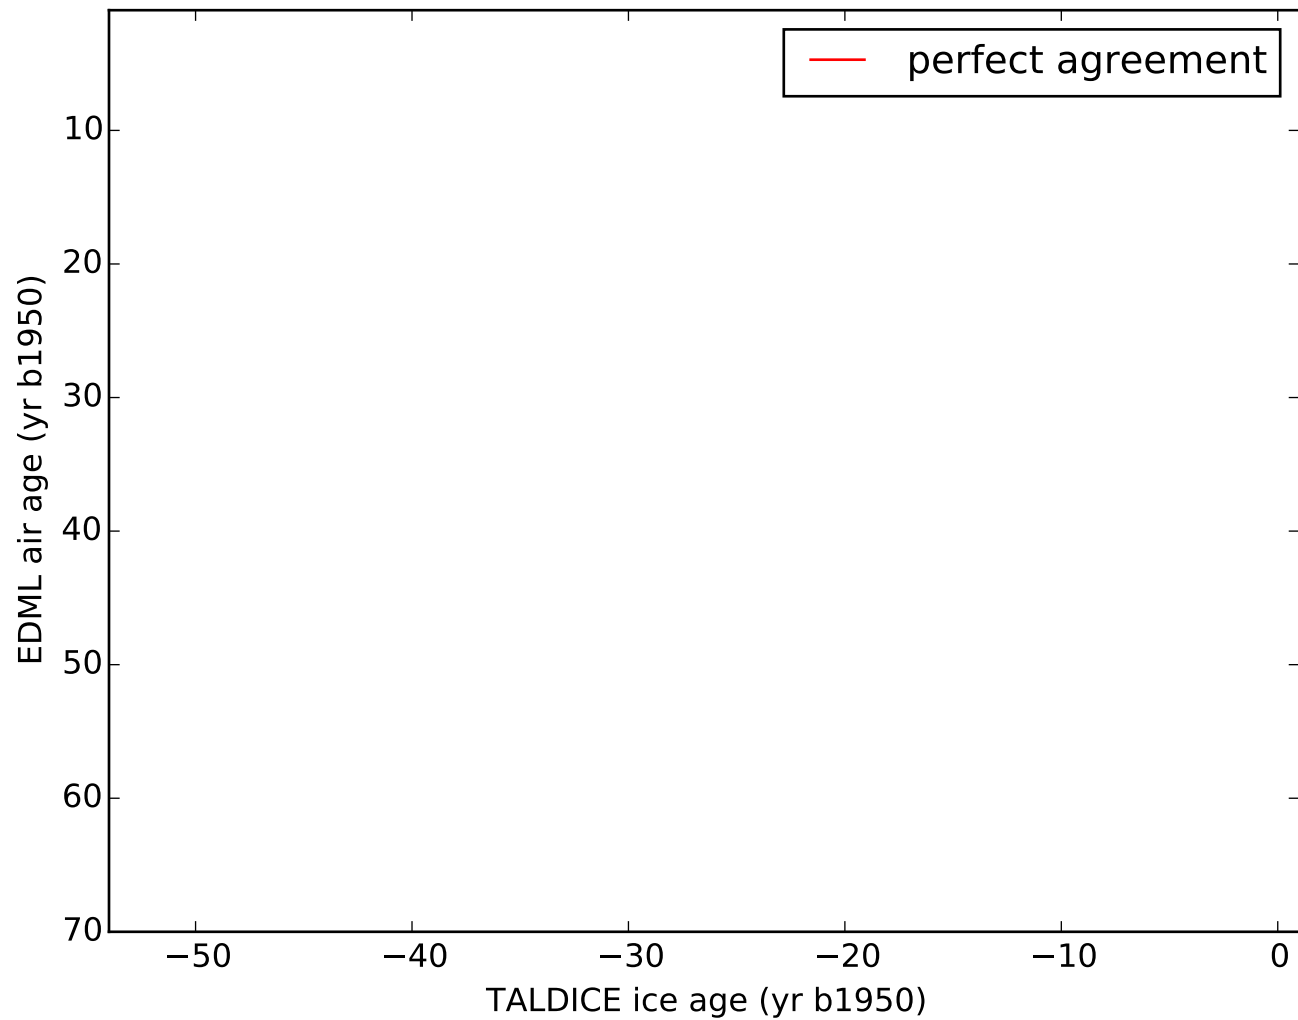

Supplement: Supplementary file 23 [file gmd-8-1473-2015-supplement.zip]

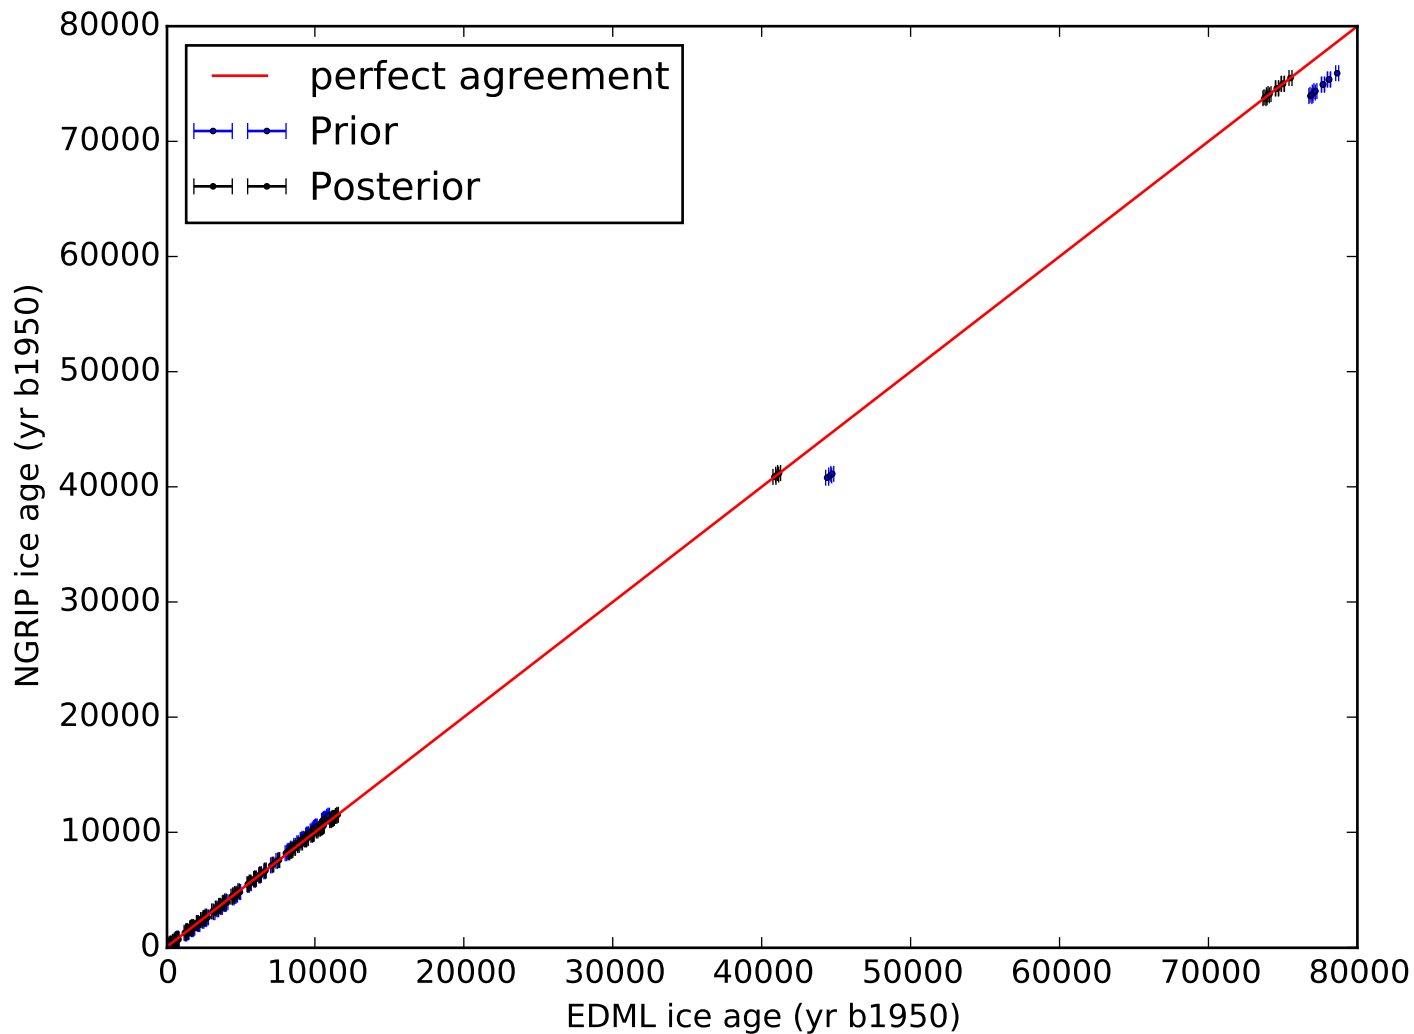

Supplement: Supplementary file 24 [file gmd-8-1473-2015-supplement.zip]

# TALDICE accumulation

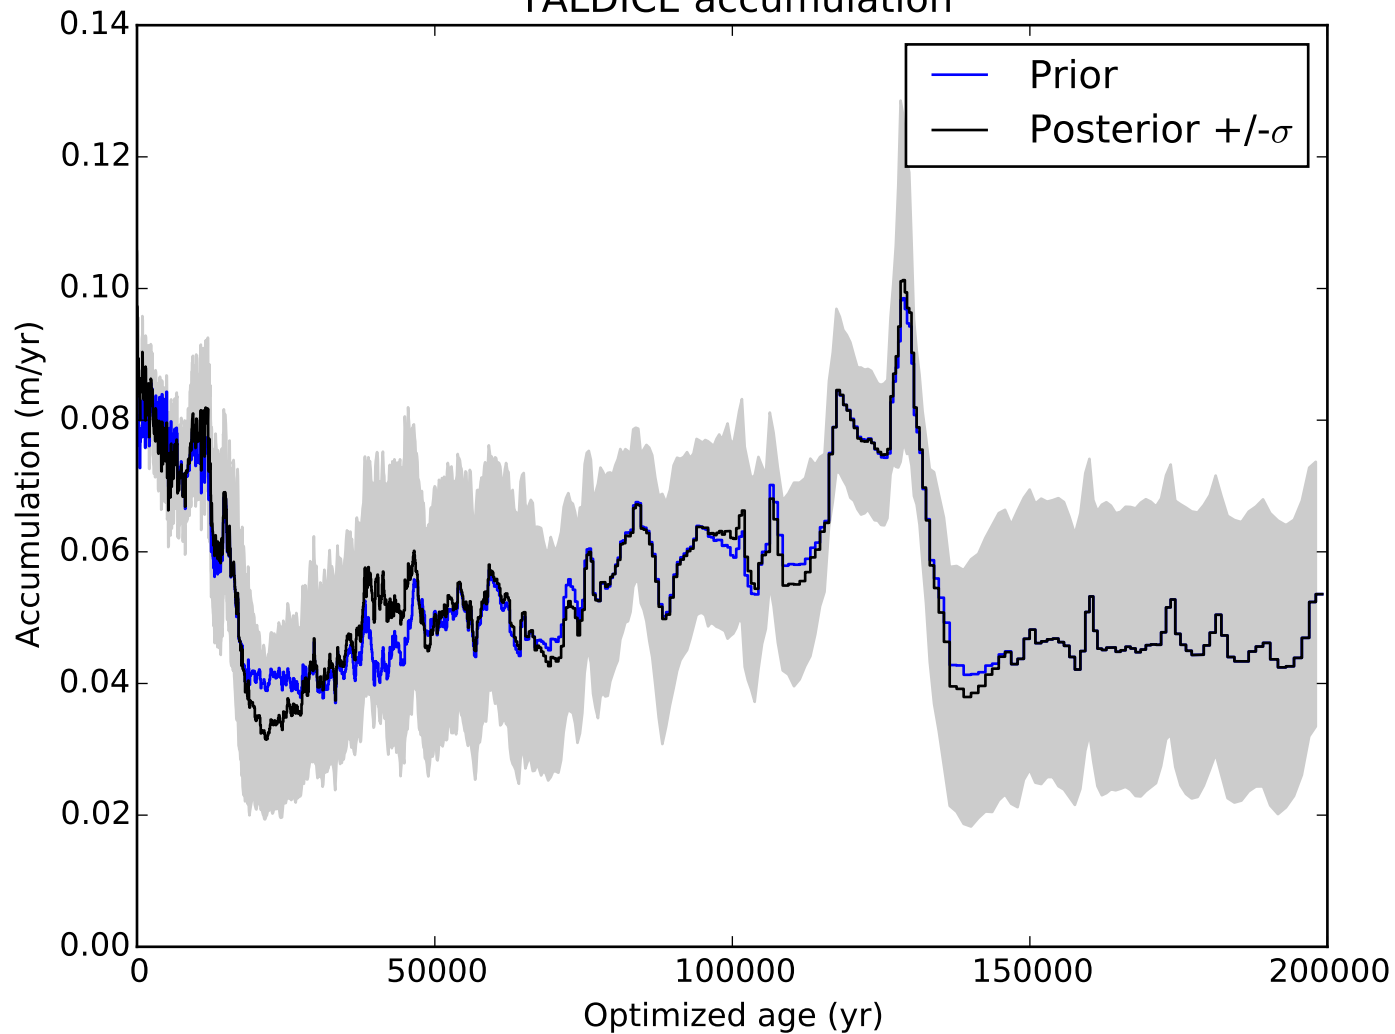

Supplement: Supplementary file 25 [file gmd-8-1473-2015-supplement.zip]

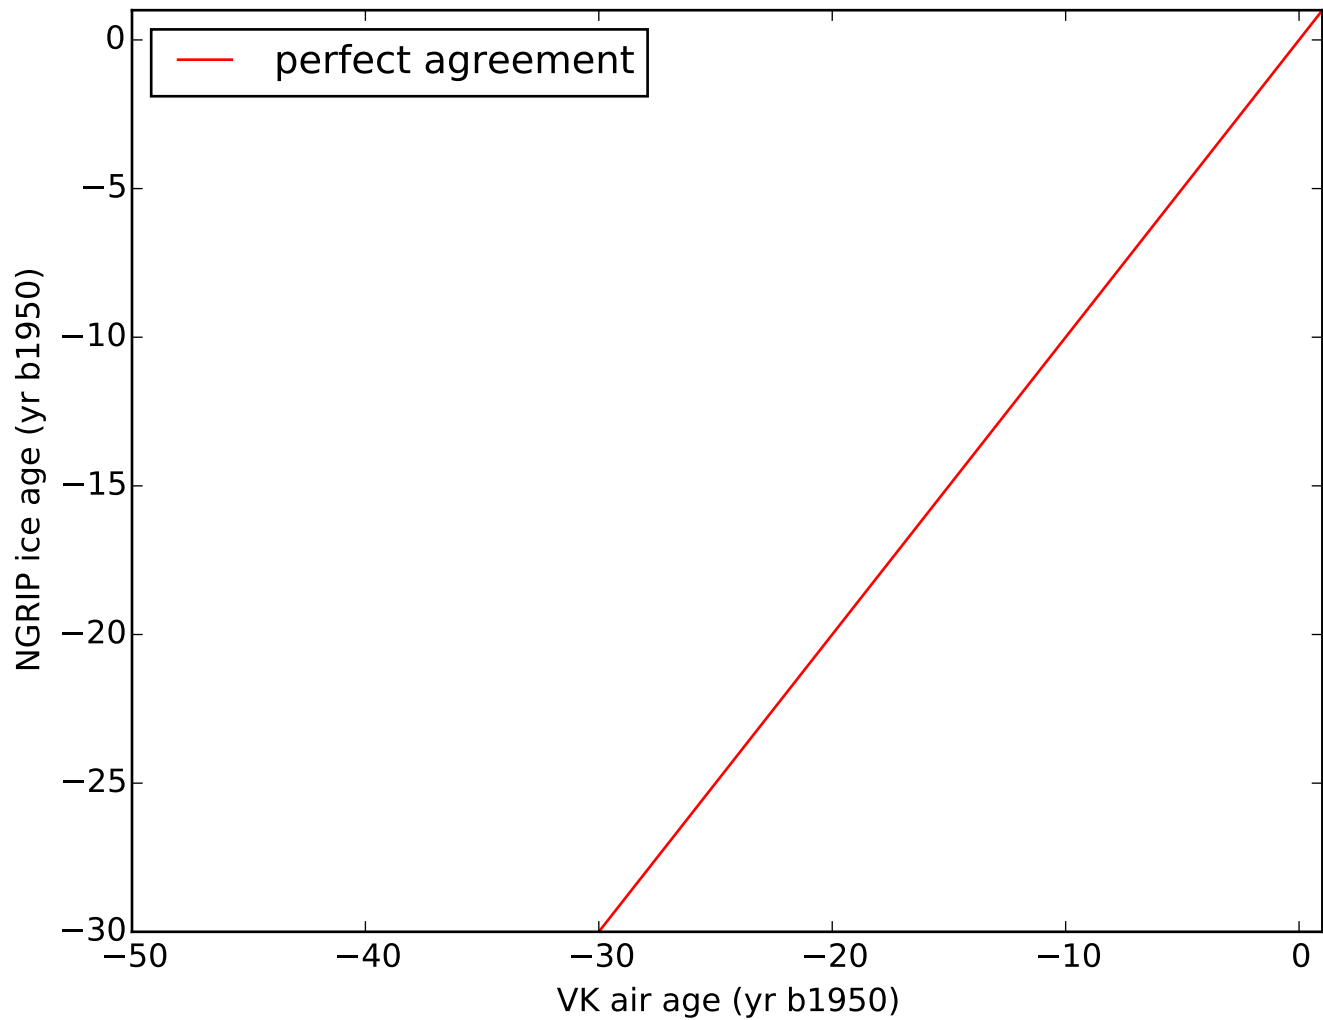

Supplement: Supplementary file 27 [file gmd-8-1473-2015-supplement.zip]

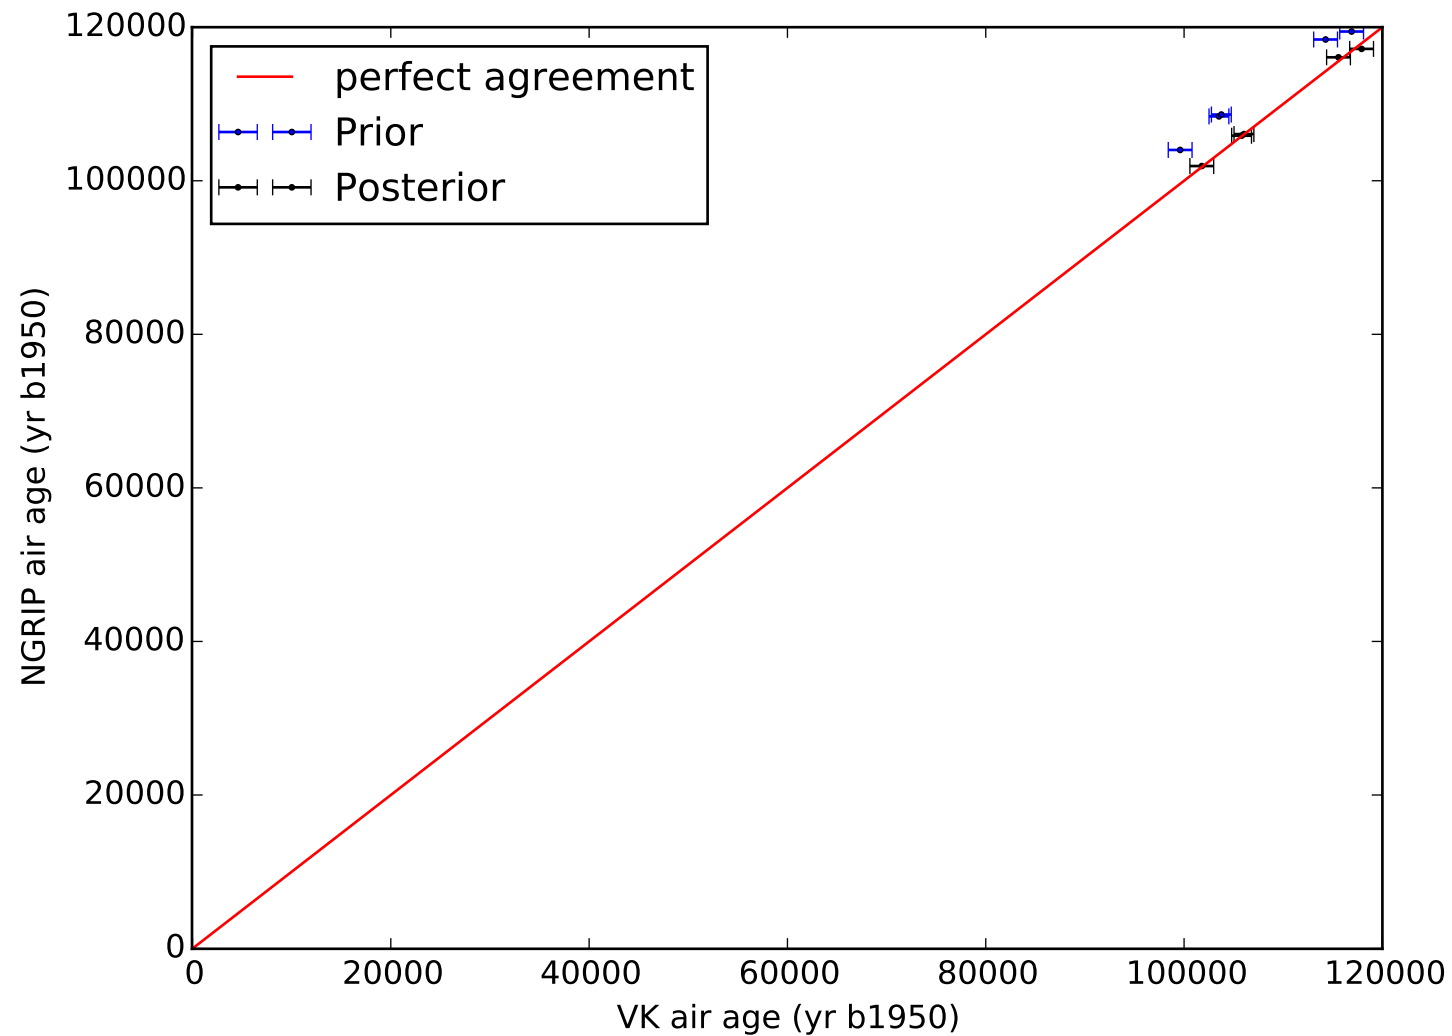

Supplement: Supplementary file 28 [file gmd-8-1473-2015-supplement.zip]

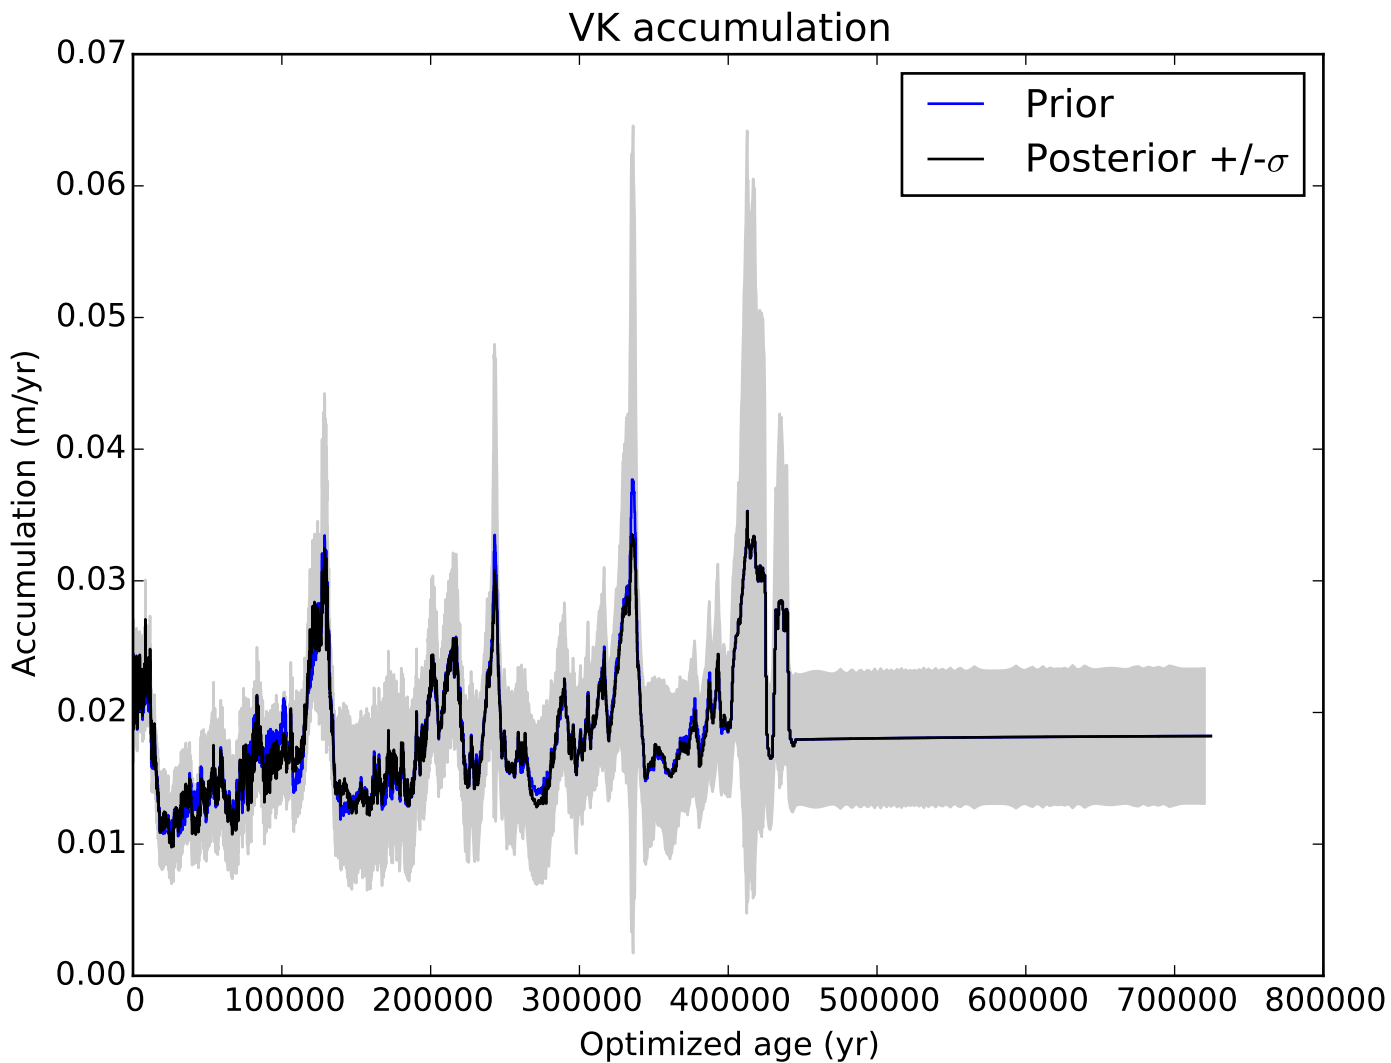

Supplement: Supplementary file 29 [file gmd-8-1473-2015-supplement.zip]

# VK ice layer thickness

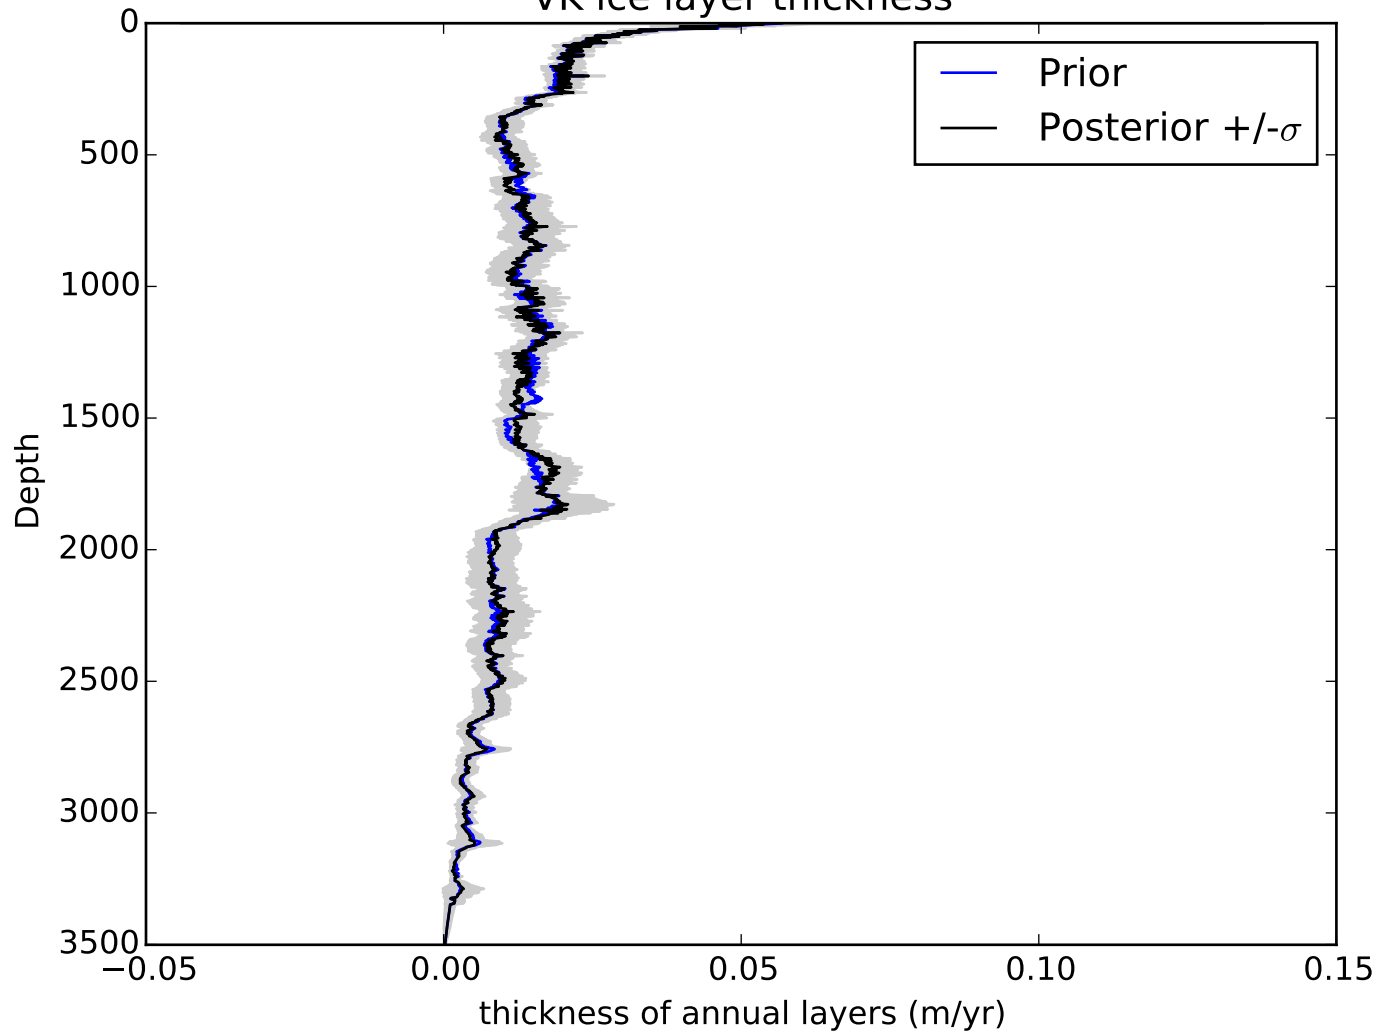

Supplement: Supplementary file 30 [file gmd-8-1473-2015-supplement.zip]

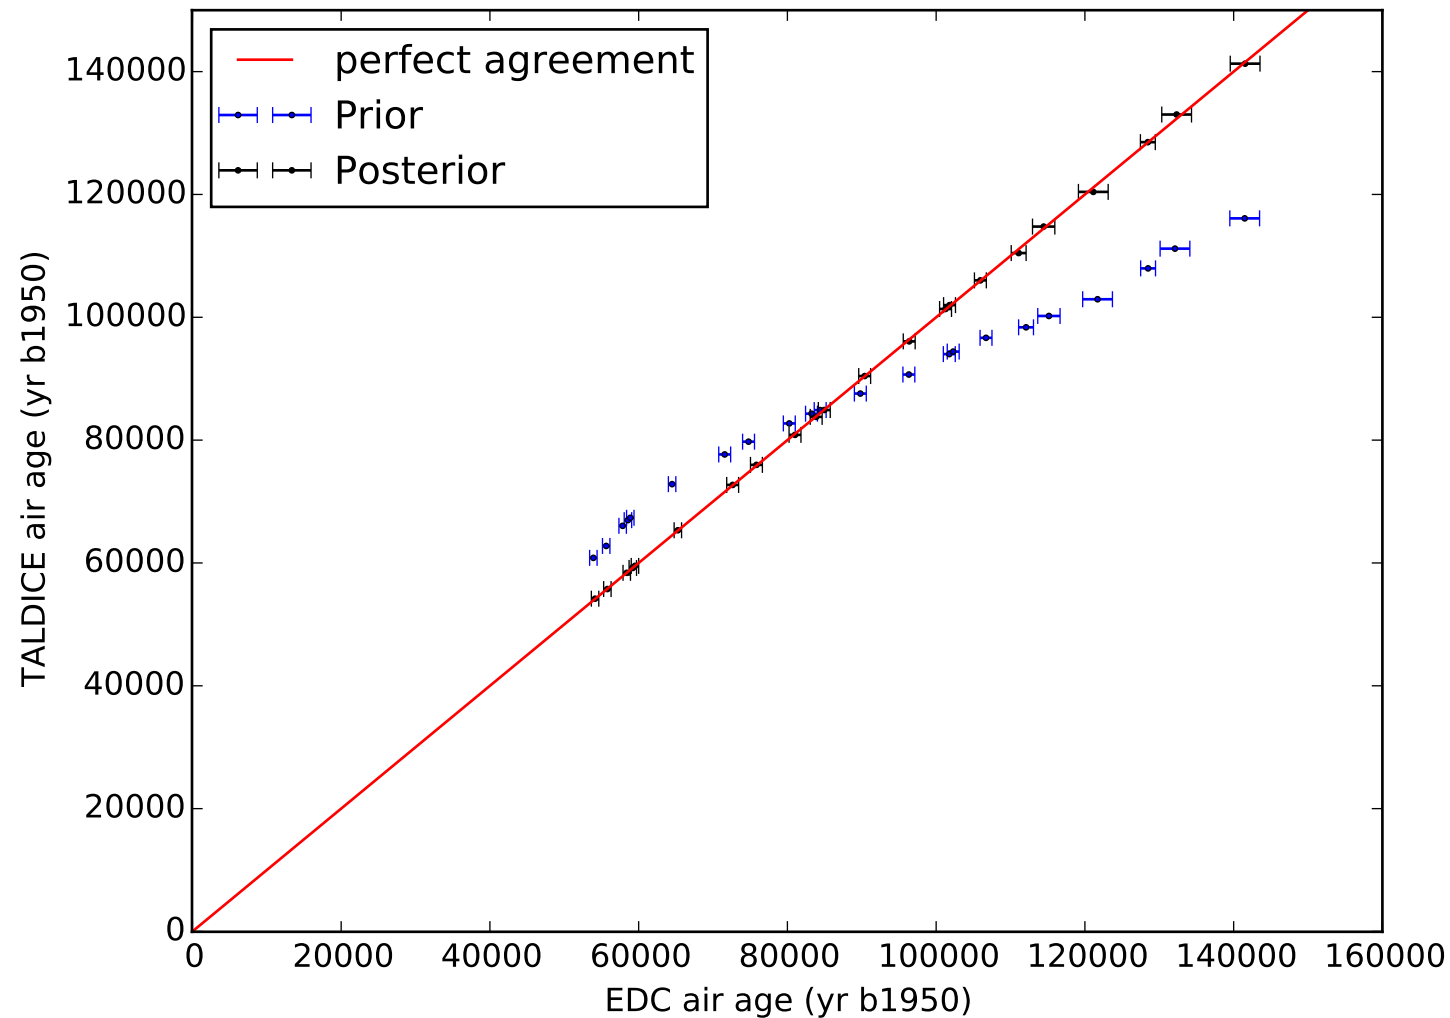

Supplement: Supplementary file 31 [file gmd-8-1473-2015-supplement.zip]

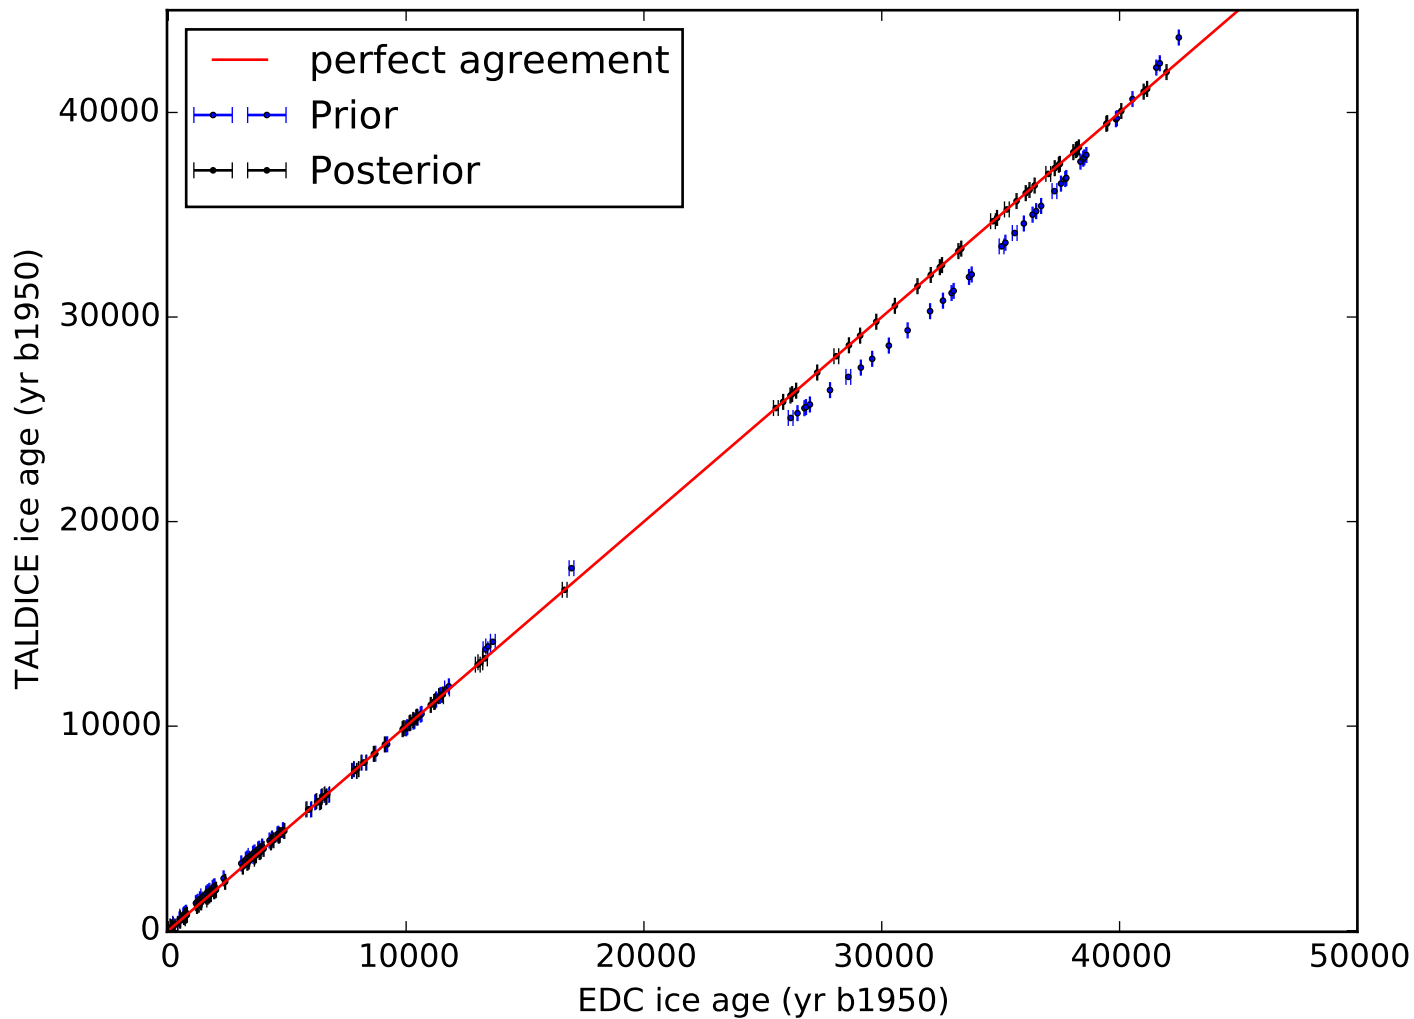

Supplement: Supplementary file 32 [file gmd-8-1473-2015-supplement.zip]

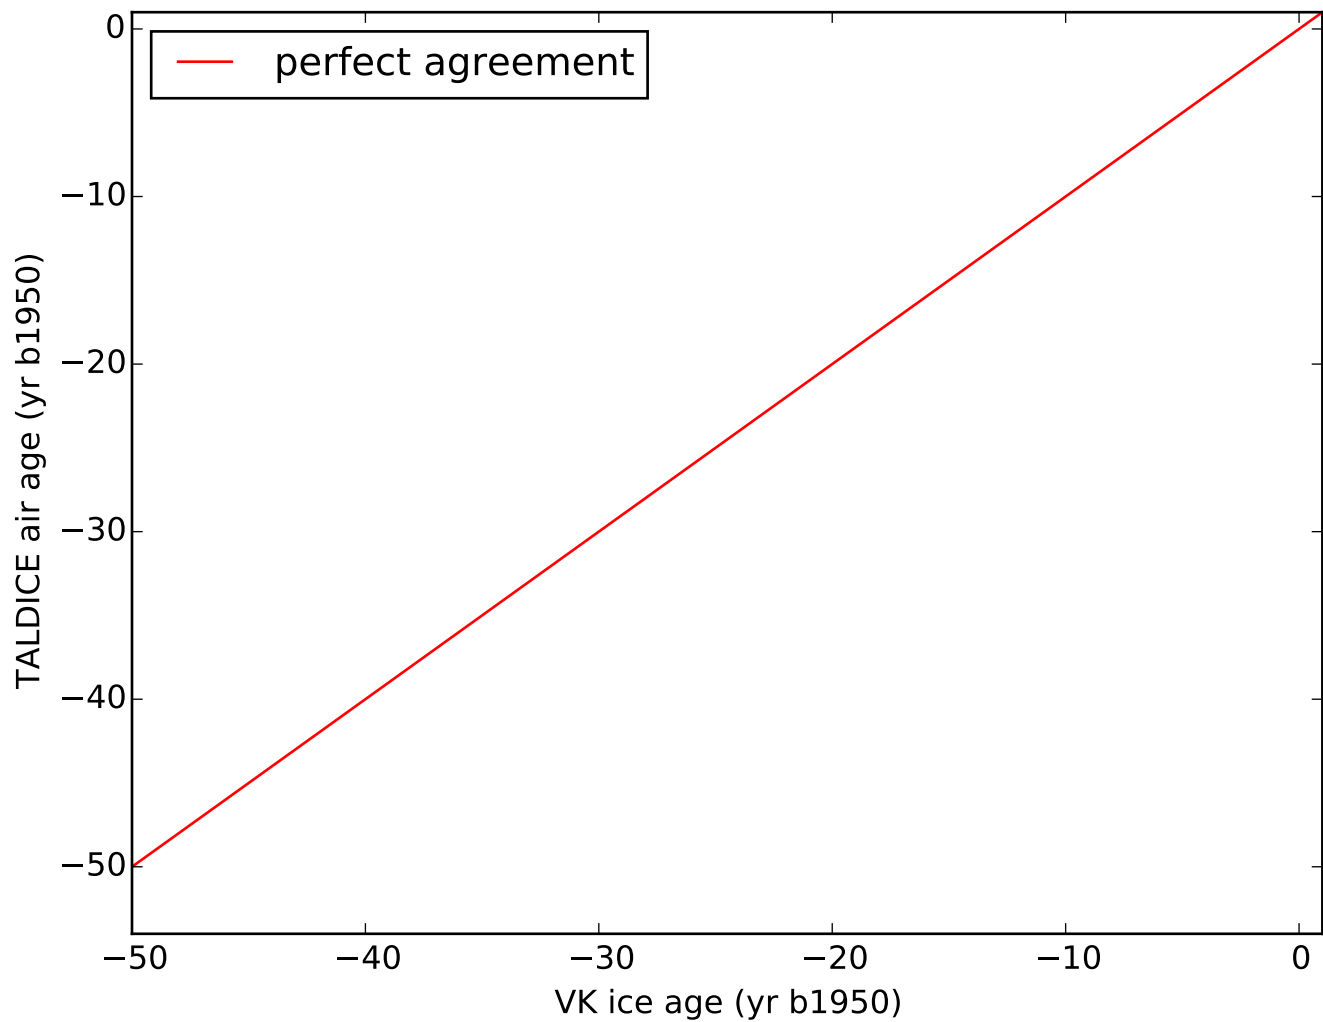

Supplement: Supplementary file 33 [file gmd-8-1473-2015-supplement.zip]

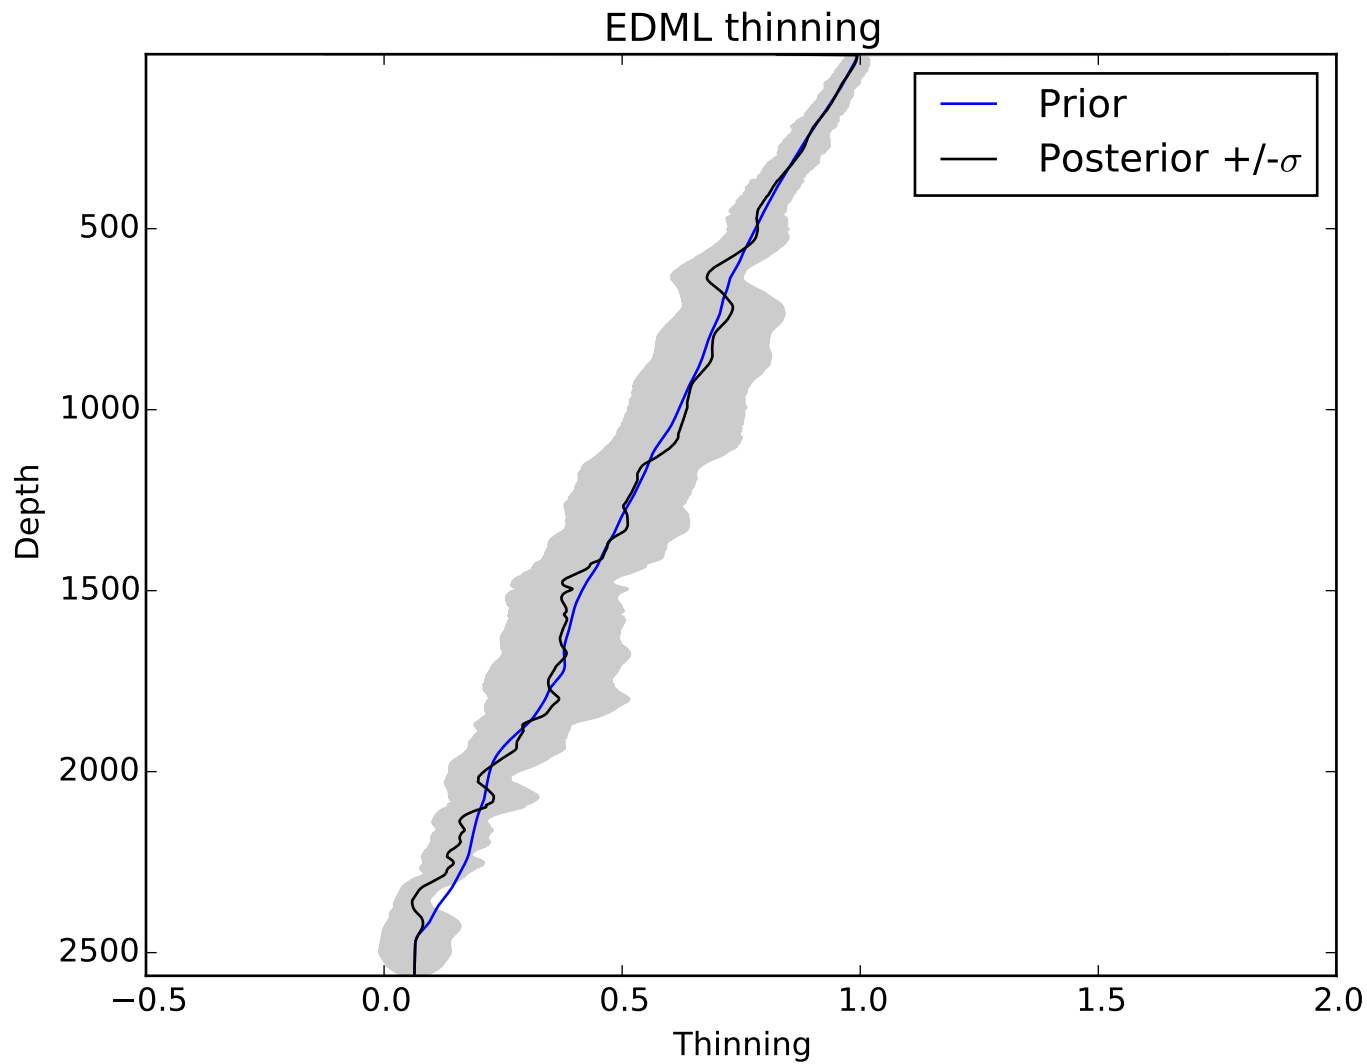

Supplement: Supplementary file 34 [file gmd-8-1473-2015-supplement.zip]

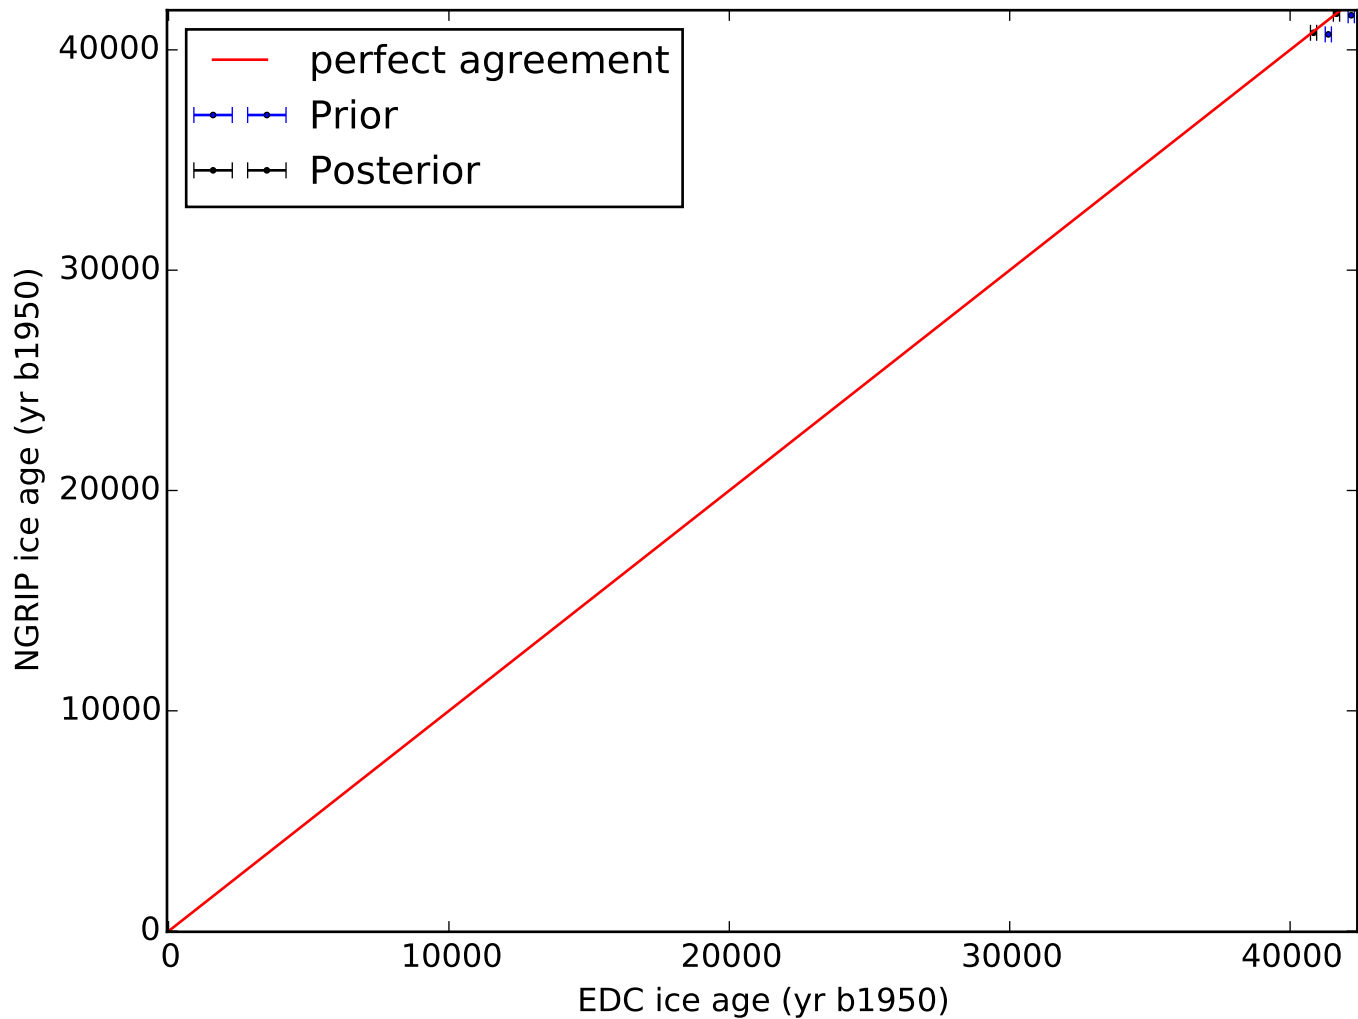

Supplement: Supplementary file 35 [file gmd-8-1473-2015-supplement.zip]

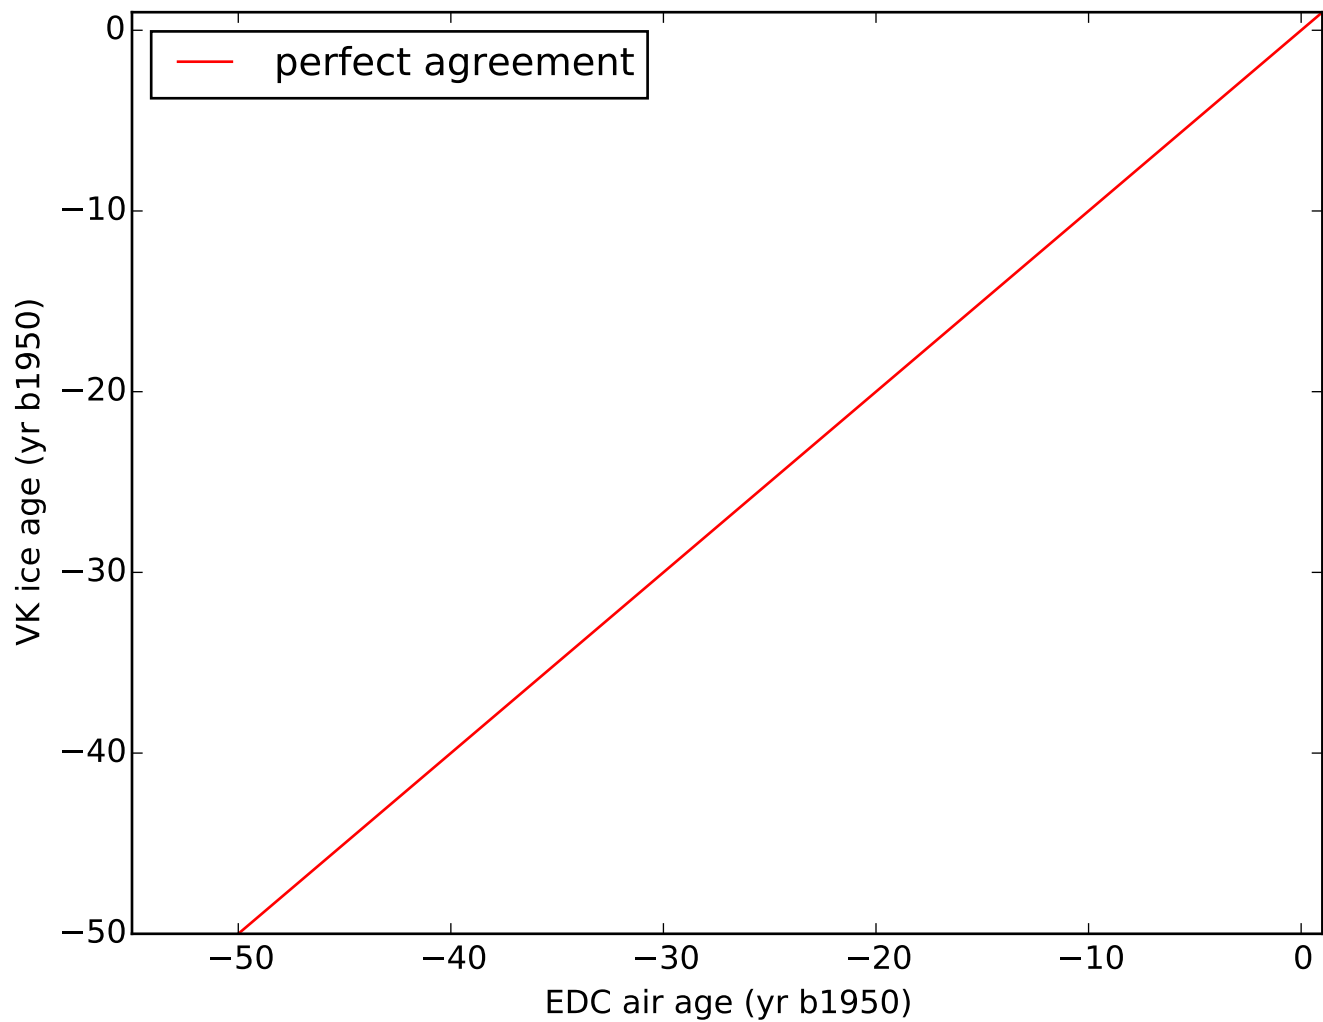

Supplement: Supplementary file 36 [file gmd-8-1473-2015-supplement.zip]

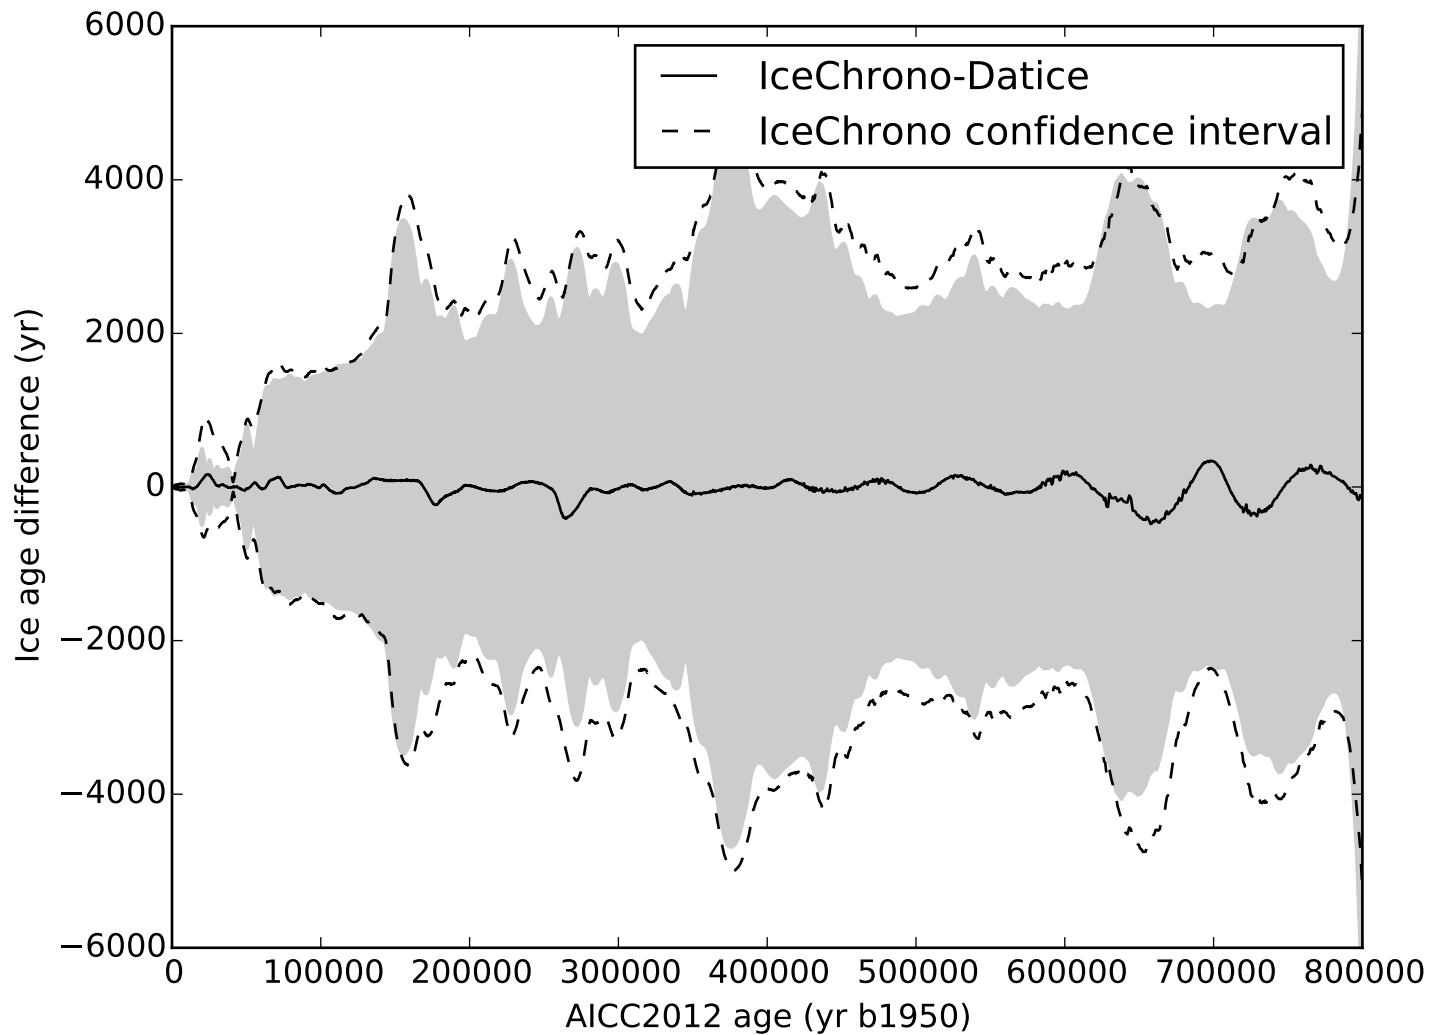

Supplement: Supplementary file 37 [file gmd-8-1473-2015-supplement.zip]

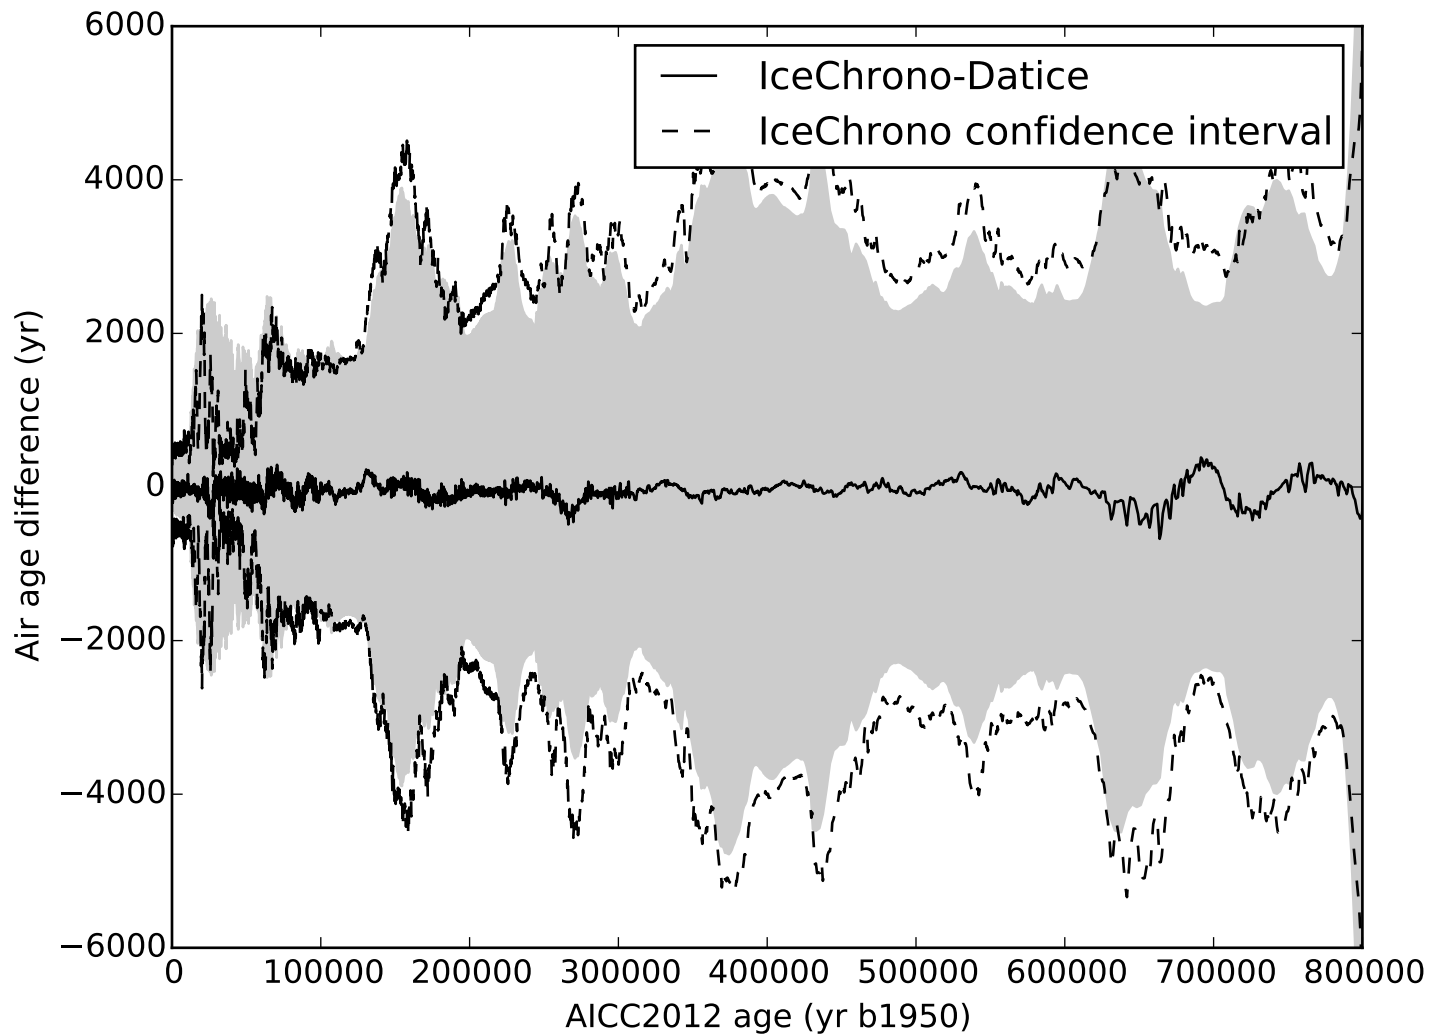

Supplement: Supplementary file 38 [file gmd-8-1473-2015-supplement.zip]

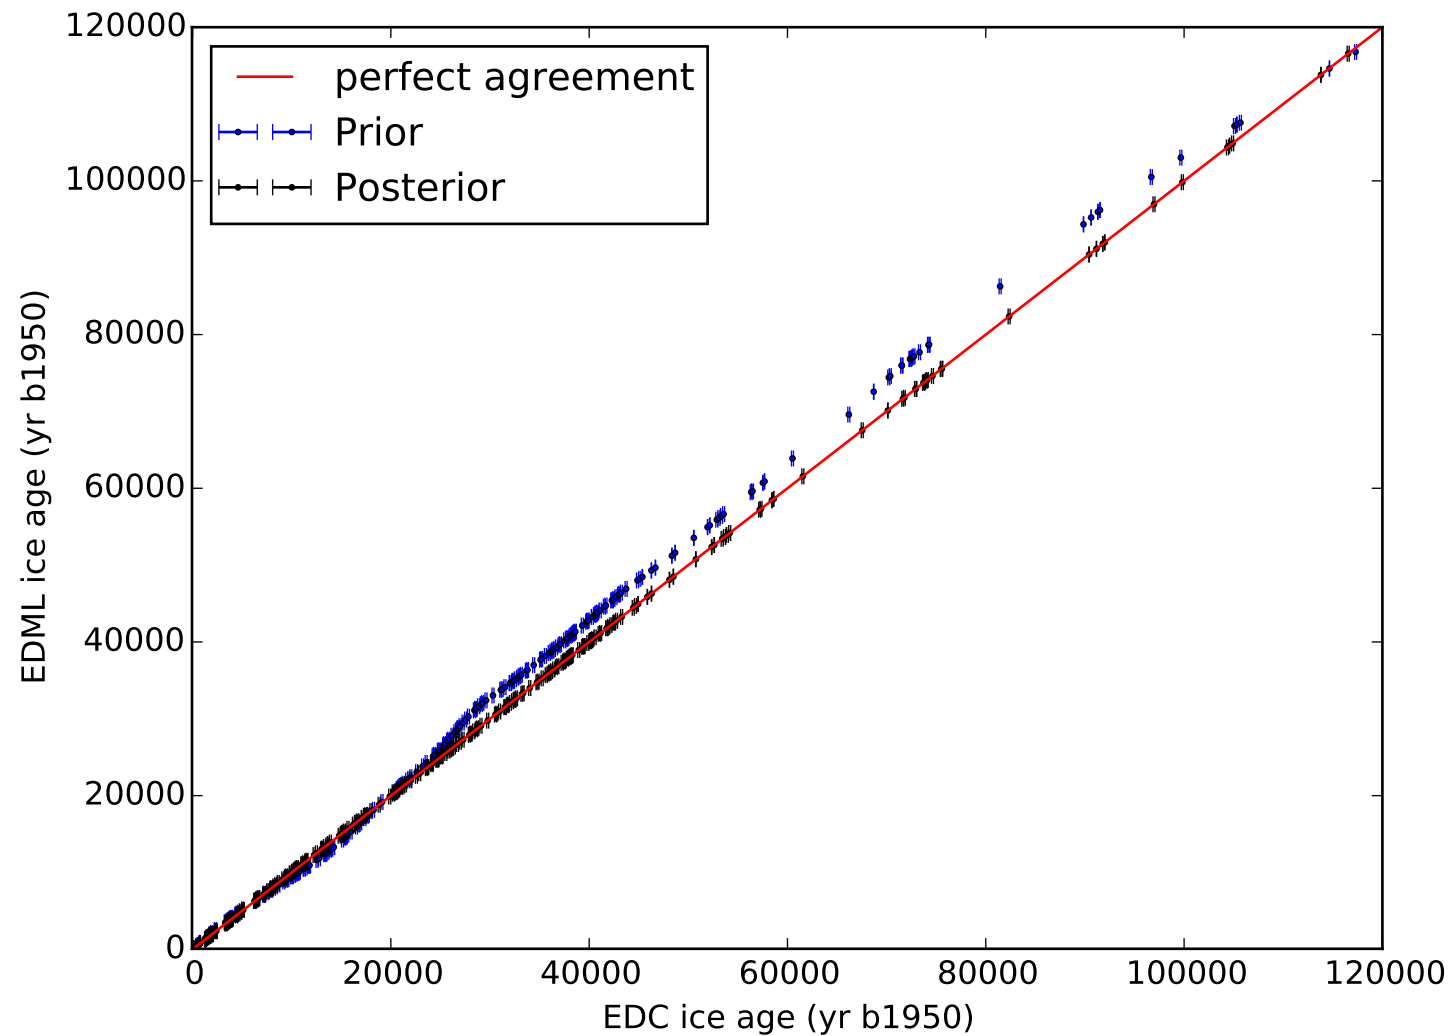

Supplement: Supplementary file 39 [file gmd-8-1473-2015-supplement.zip]

# EDC ice layer thickness

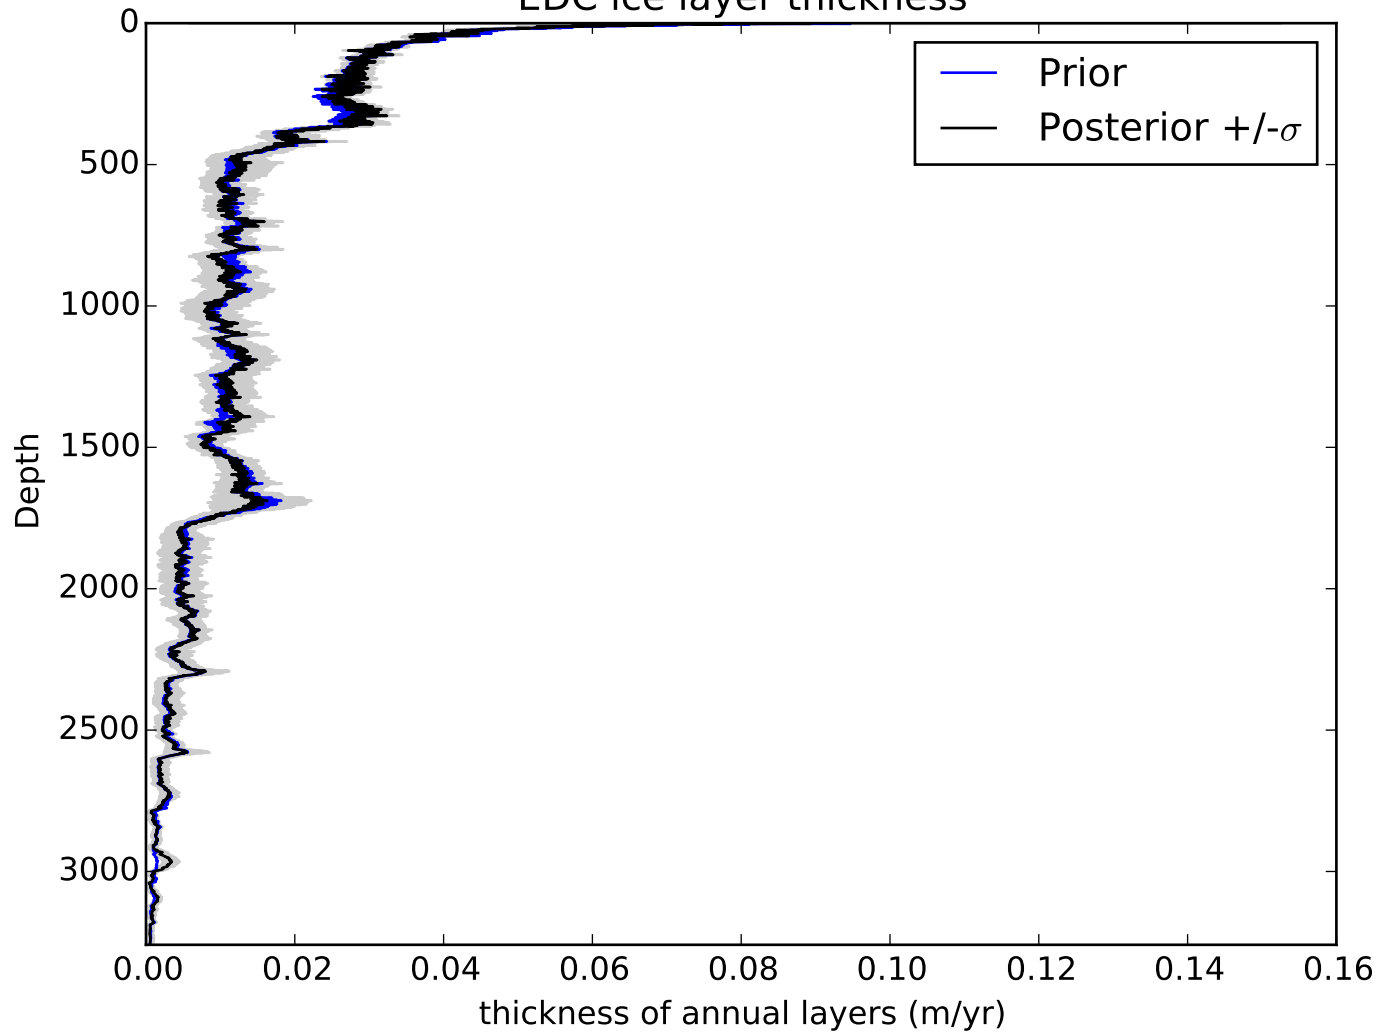

Supplement: Supplementary file 40 [file gmd-8-1473-2015-supplement.zip]

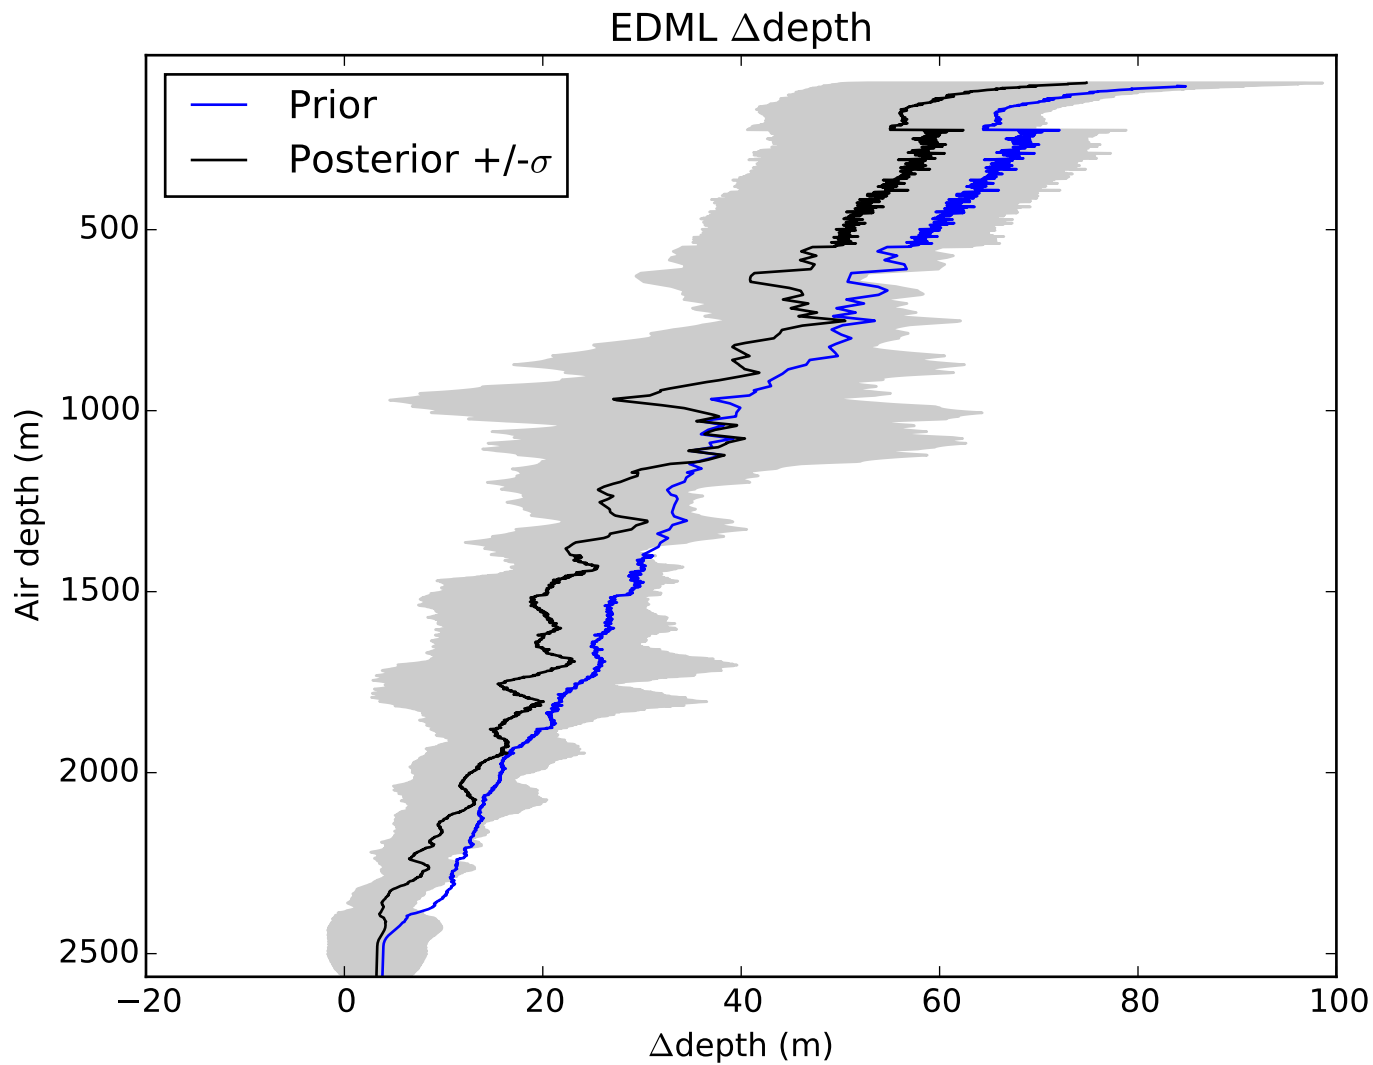

Supplement: Supplementary file 41 [file gmd-8-1473-2015-supplement.zip]

# EDML ice age

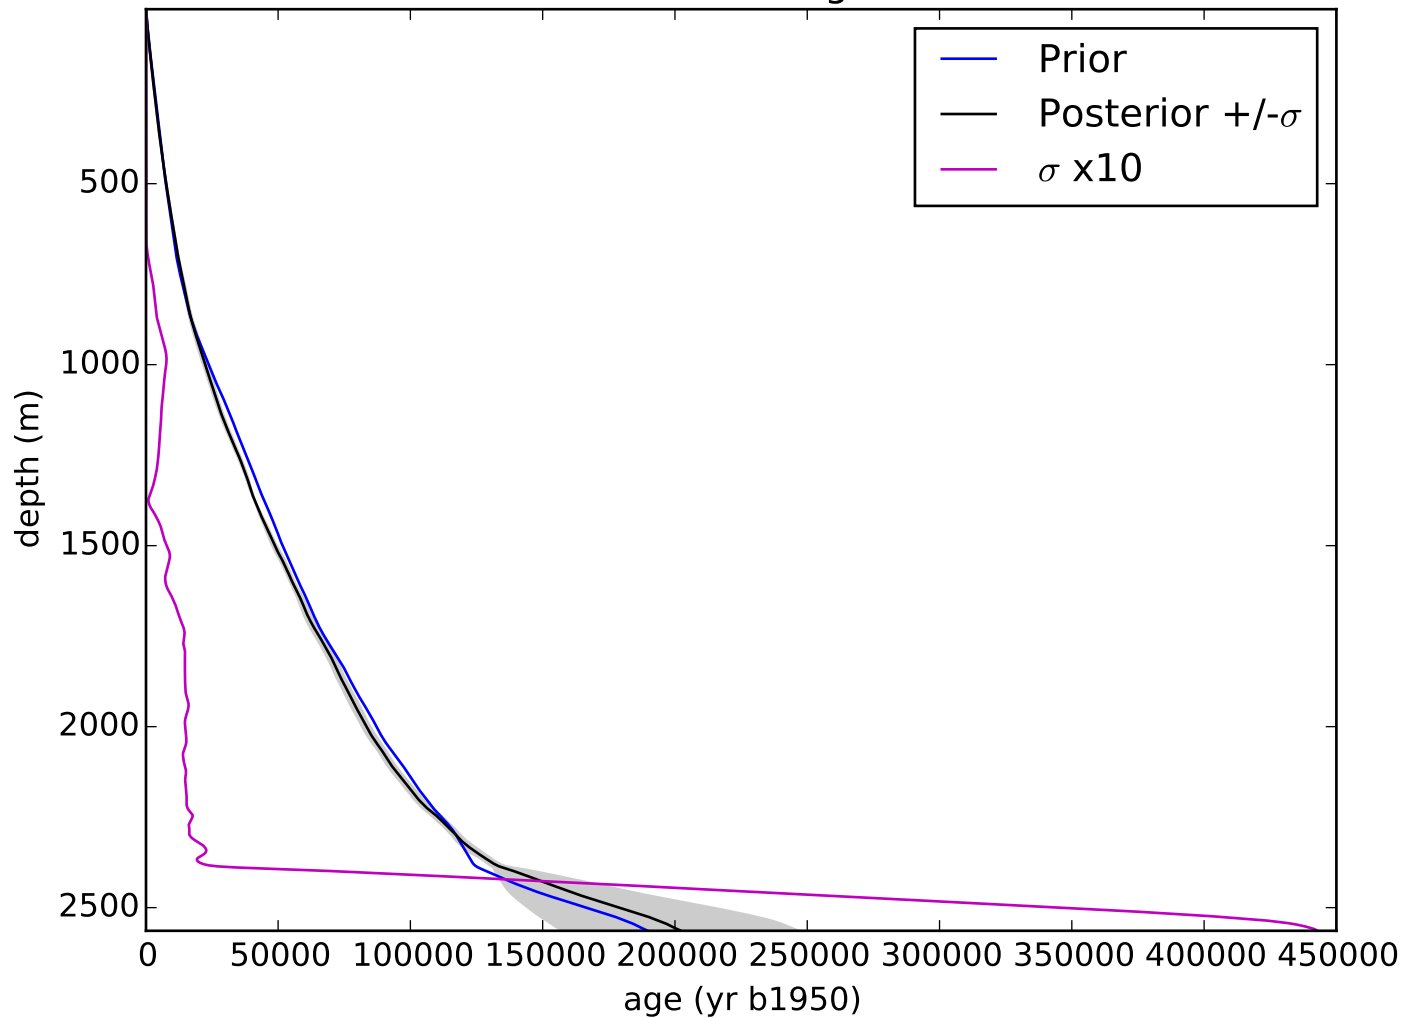

Supplement: Supplementary file 42 [file gmd-8-1473-2015-supplement.zip]

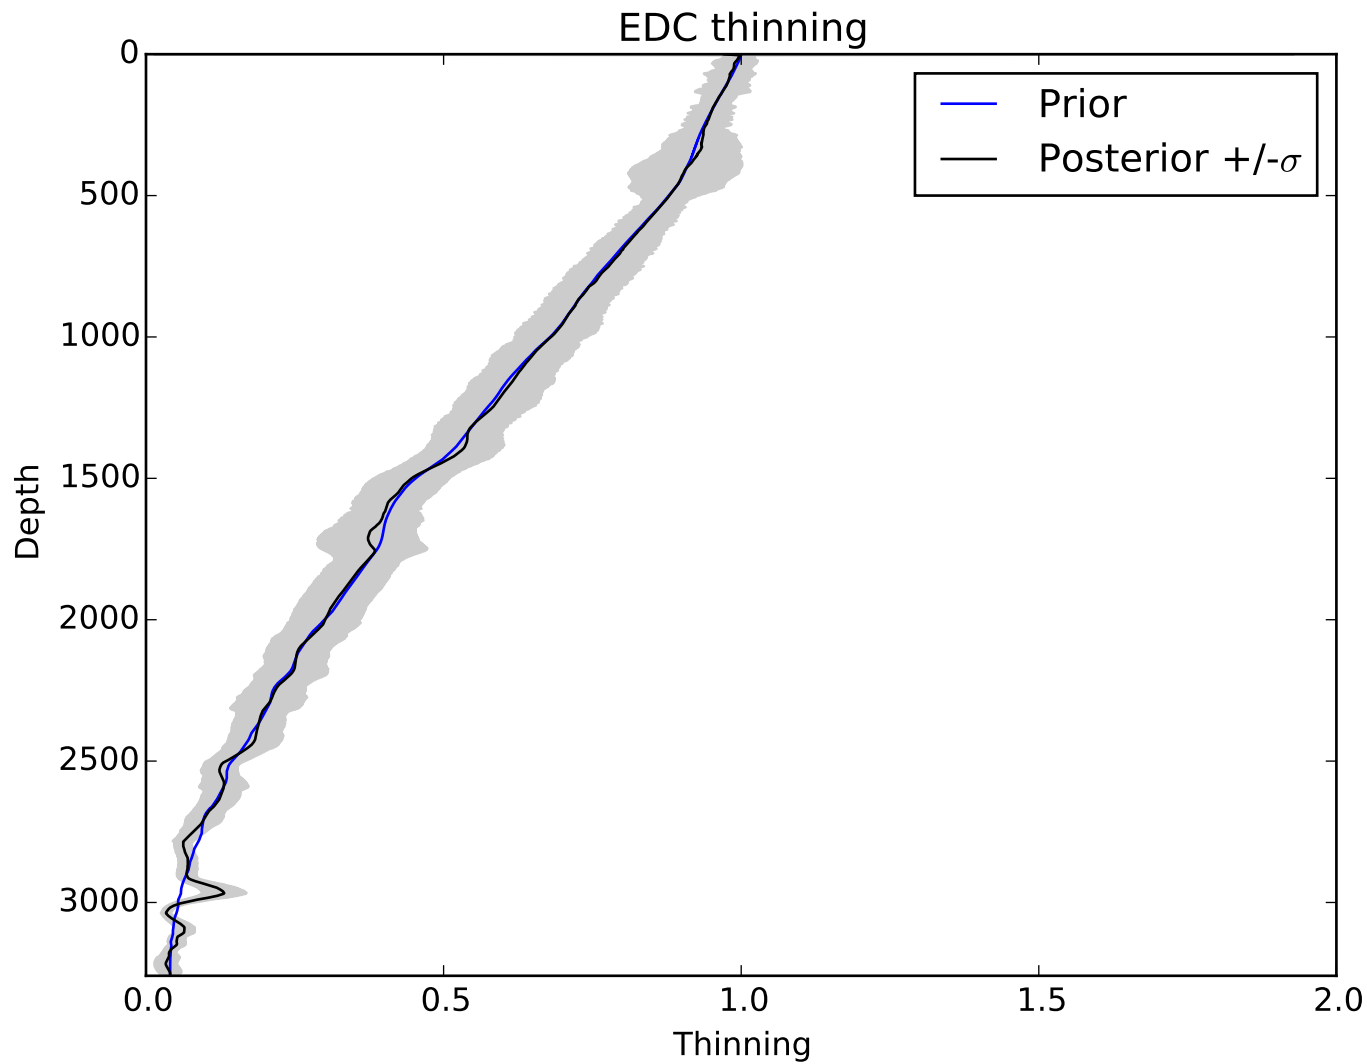

Supplement: Supplementary file 43 [file gmd-8-1473-2015-supplement.zip]

# NGRIP accumulation

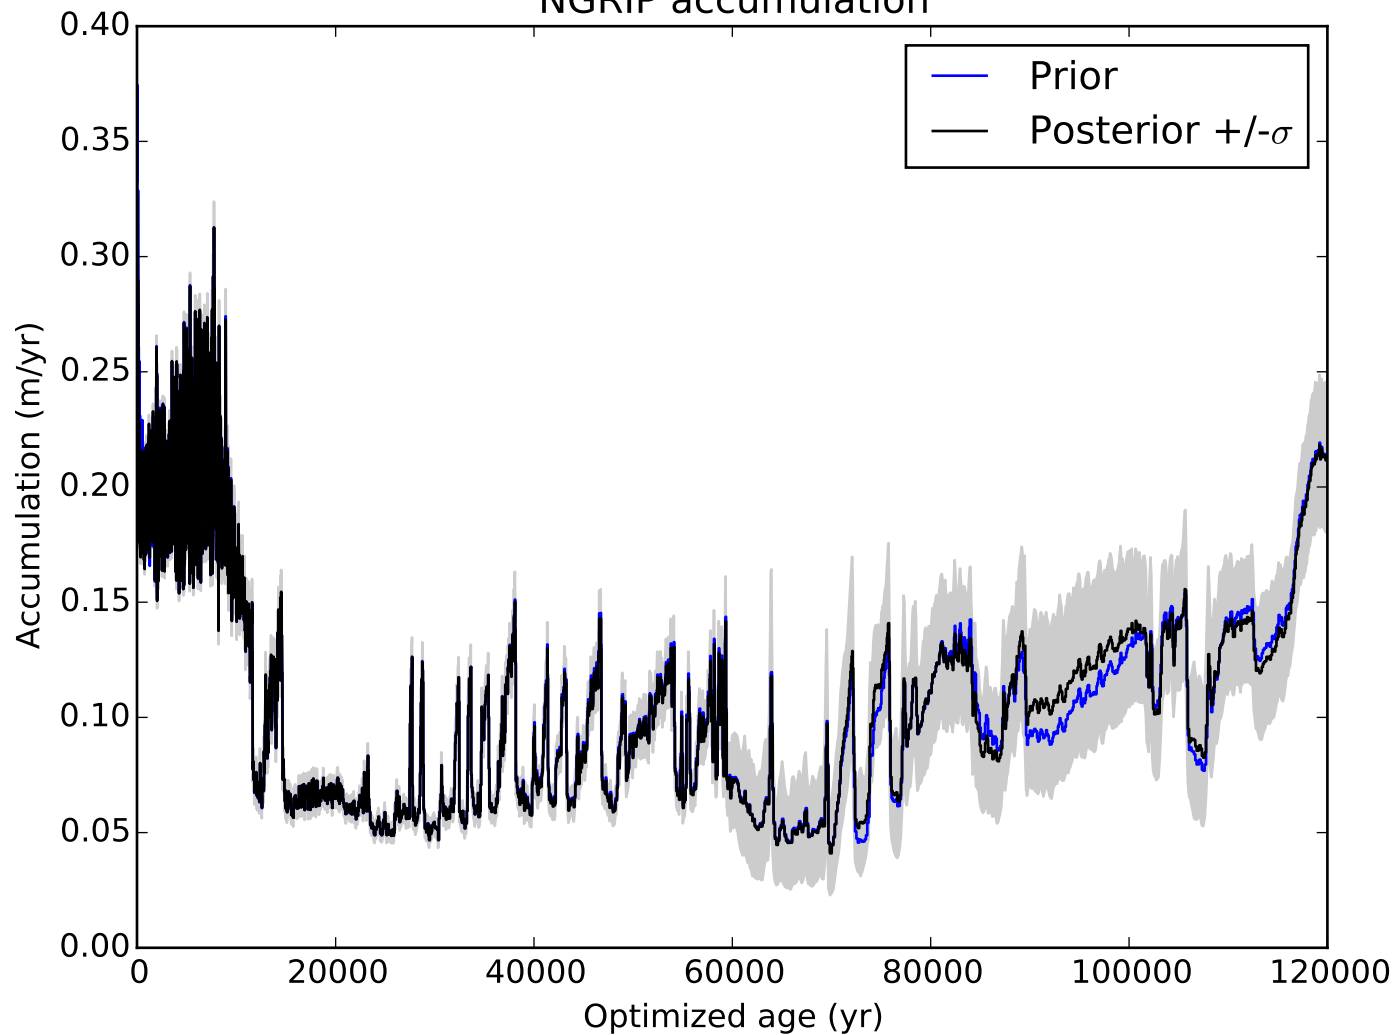

Supplement: Supplementary file 45 [file gmd-8-1473-2015-supplement.zip]

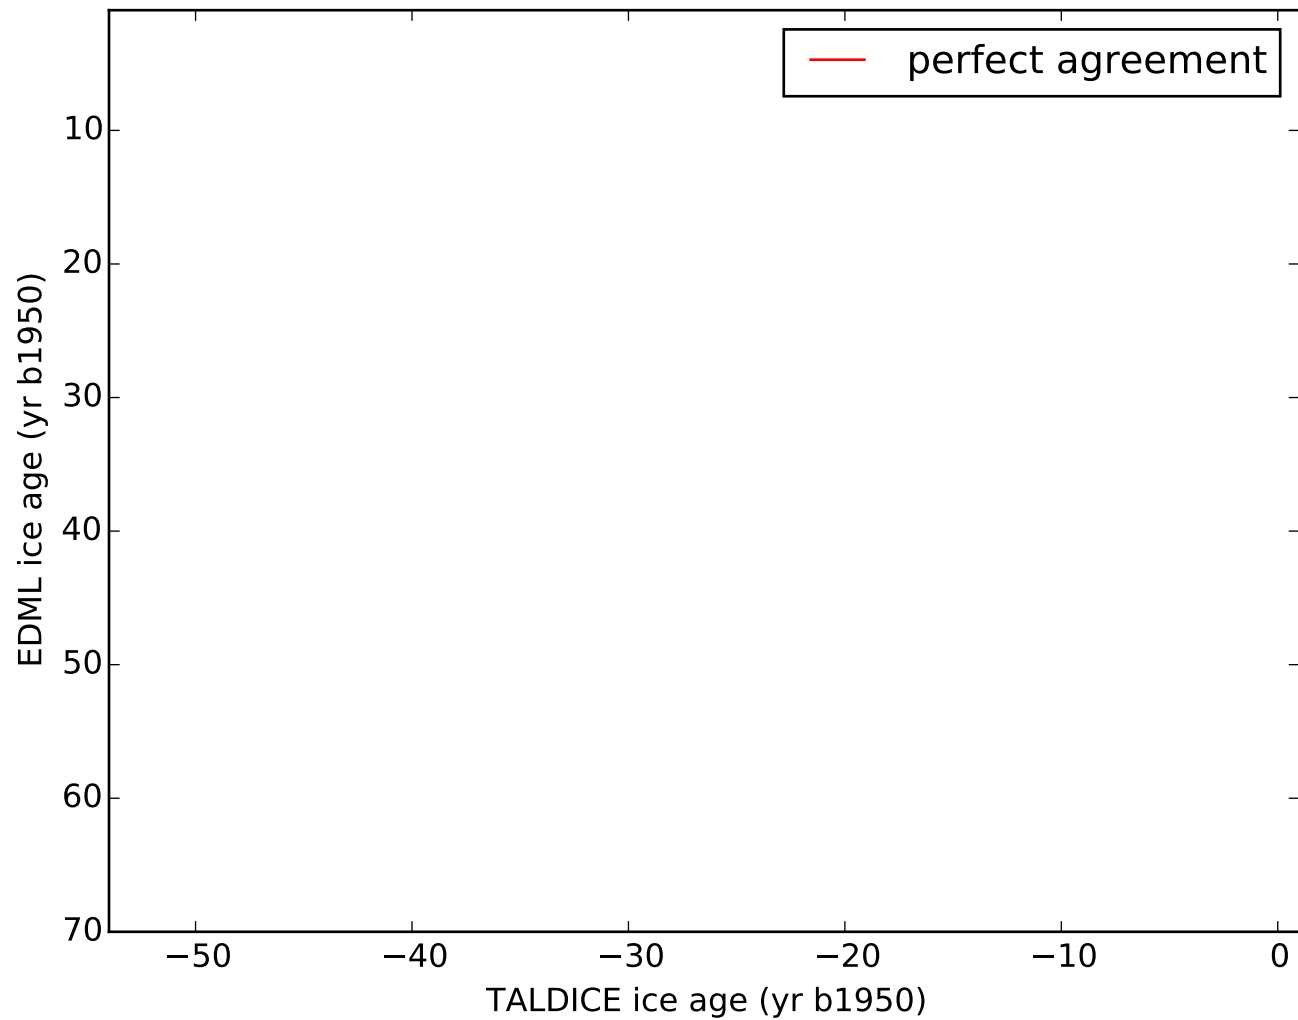

Supplement: Supplementary file 46 [file gmd-8-1473-2015-supplement.zip]

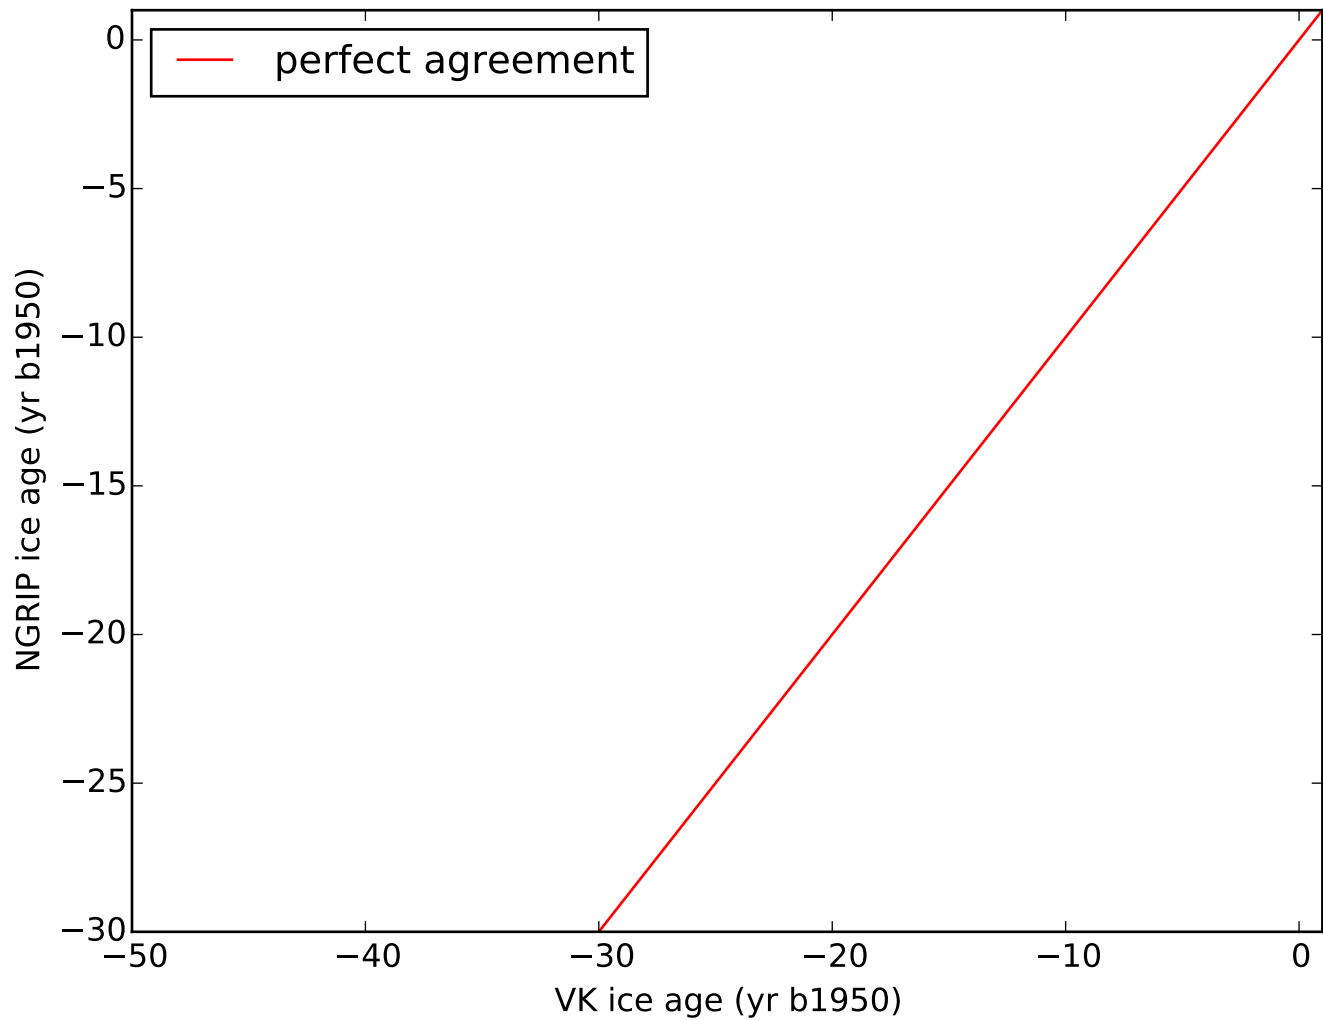

Supplement: Supplementary file 47 [file gmd-8-1473-2015-supplement.zip]

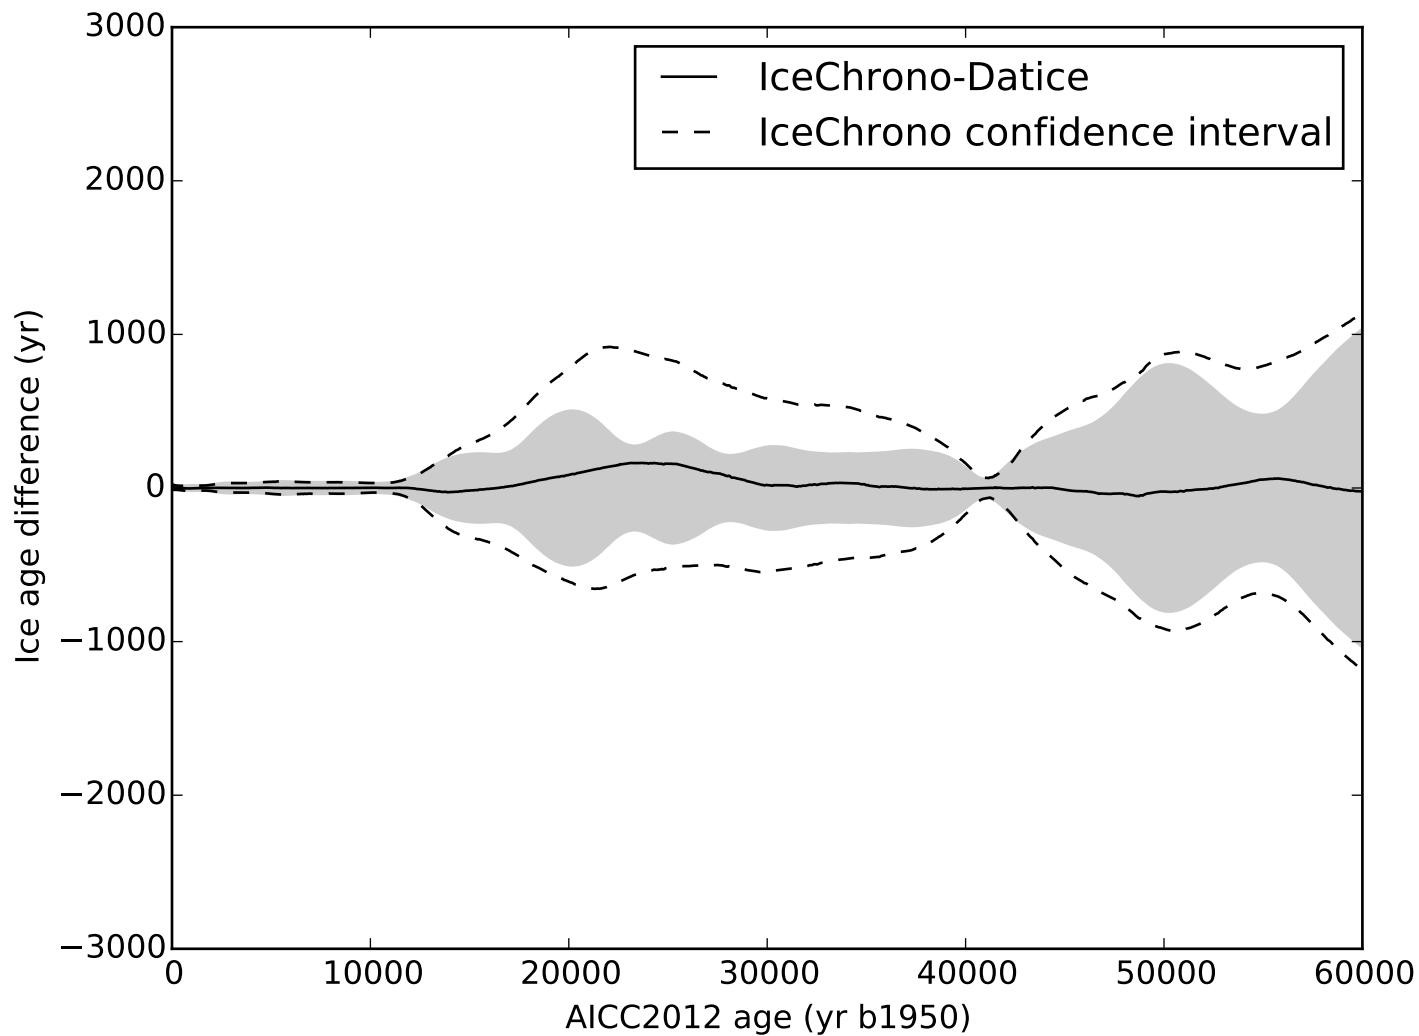

Supplement: Supplementary file 48 [file gmd-8-1473-2015-supplement.zip]

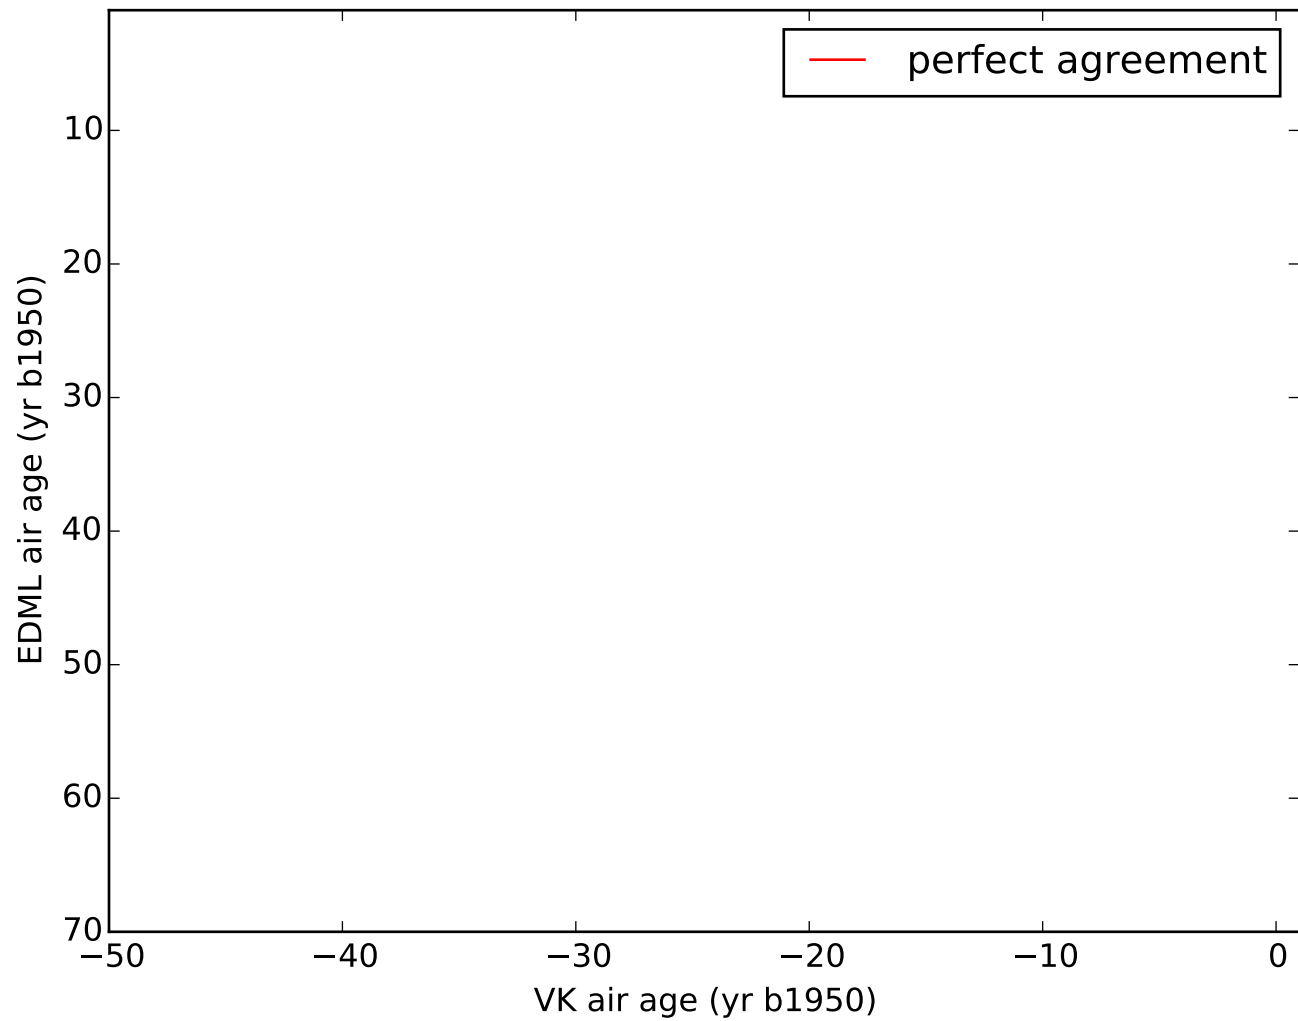

Supplement: Supplementary file 49 [file gmd-8-1473-2015-supplement.zip]

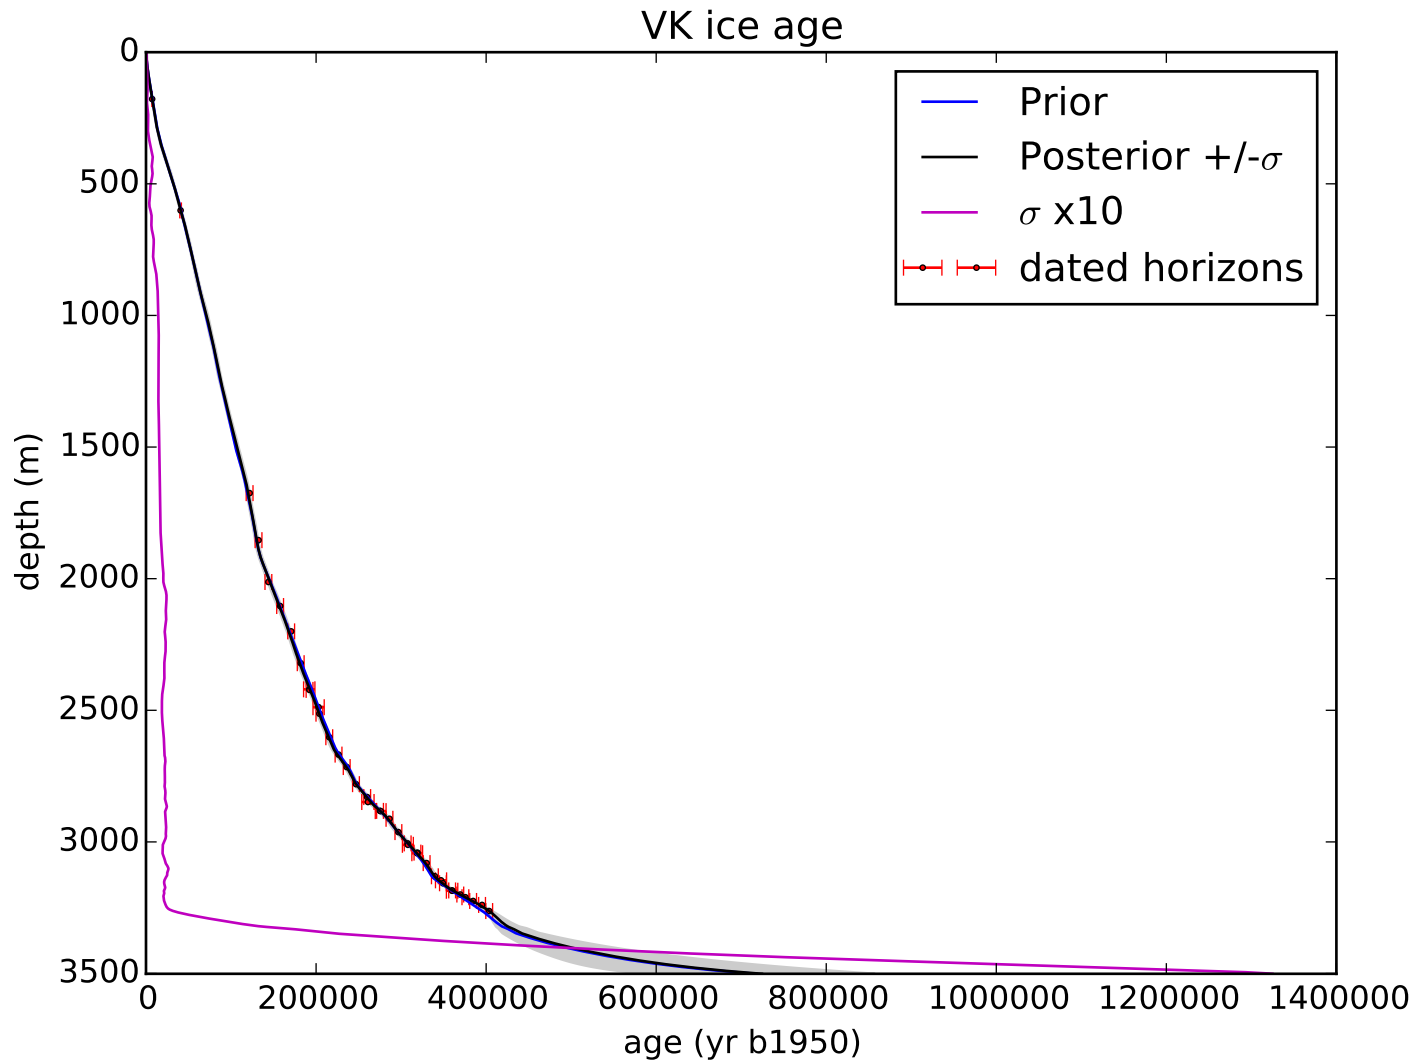

Supplement: Supplementary file 50 [file gmd-8-1473-2015-supplement.zip]

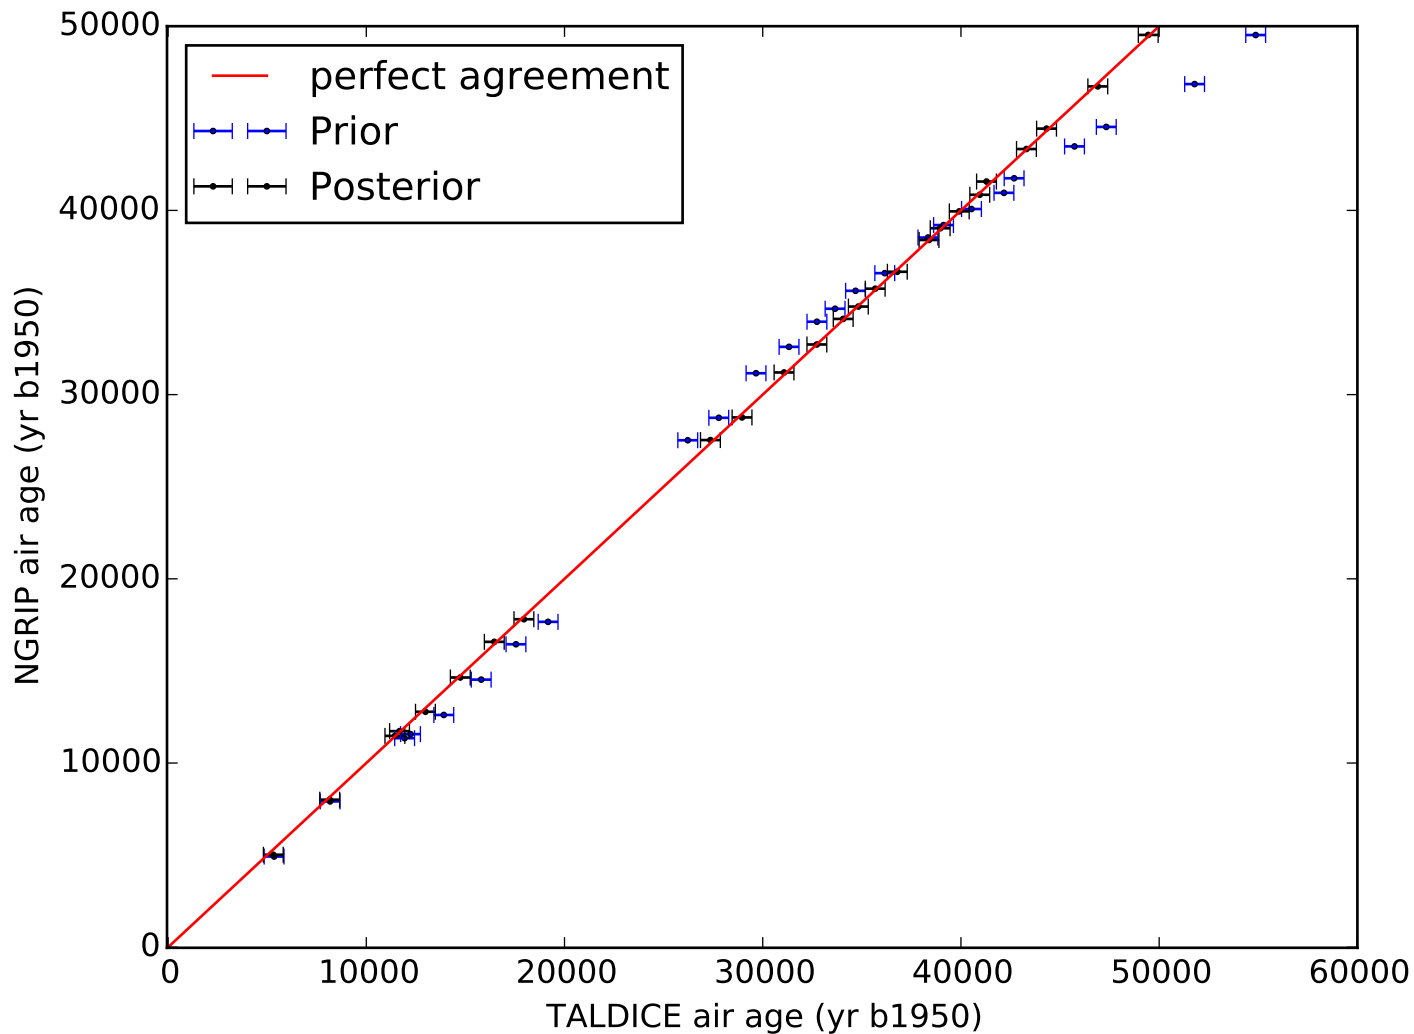

Supplement: Supplementary file 52 [file gmd-8-1473-2015-supplement.zip]

# TALDICE ice layer thickness

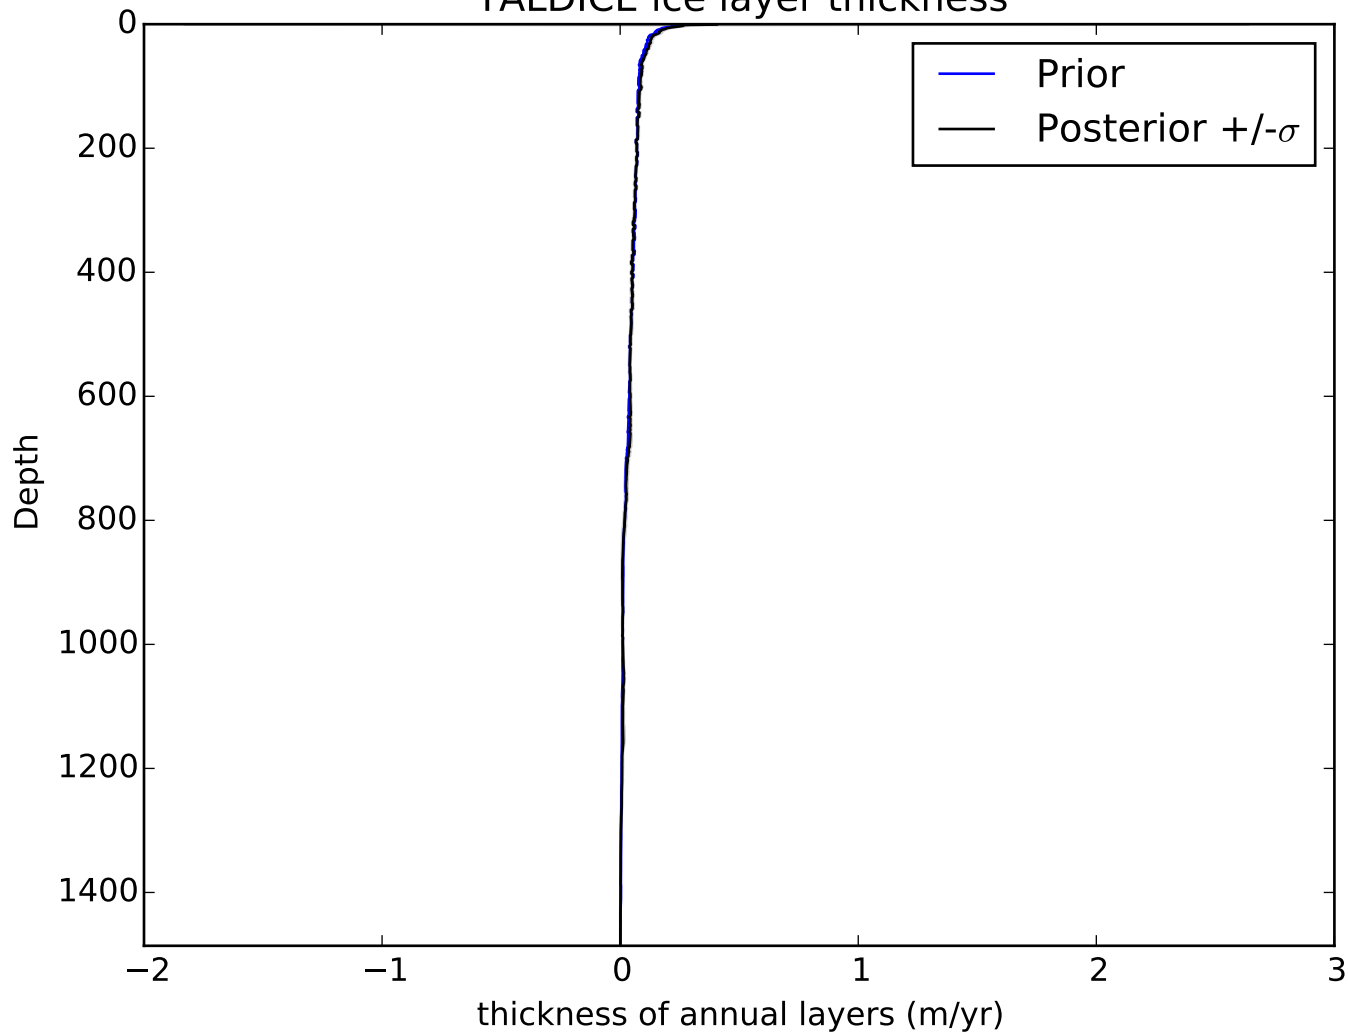

Supplement: Supplementary file 53 [file gmd-8-1473-2015-supplement.zip]

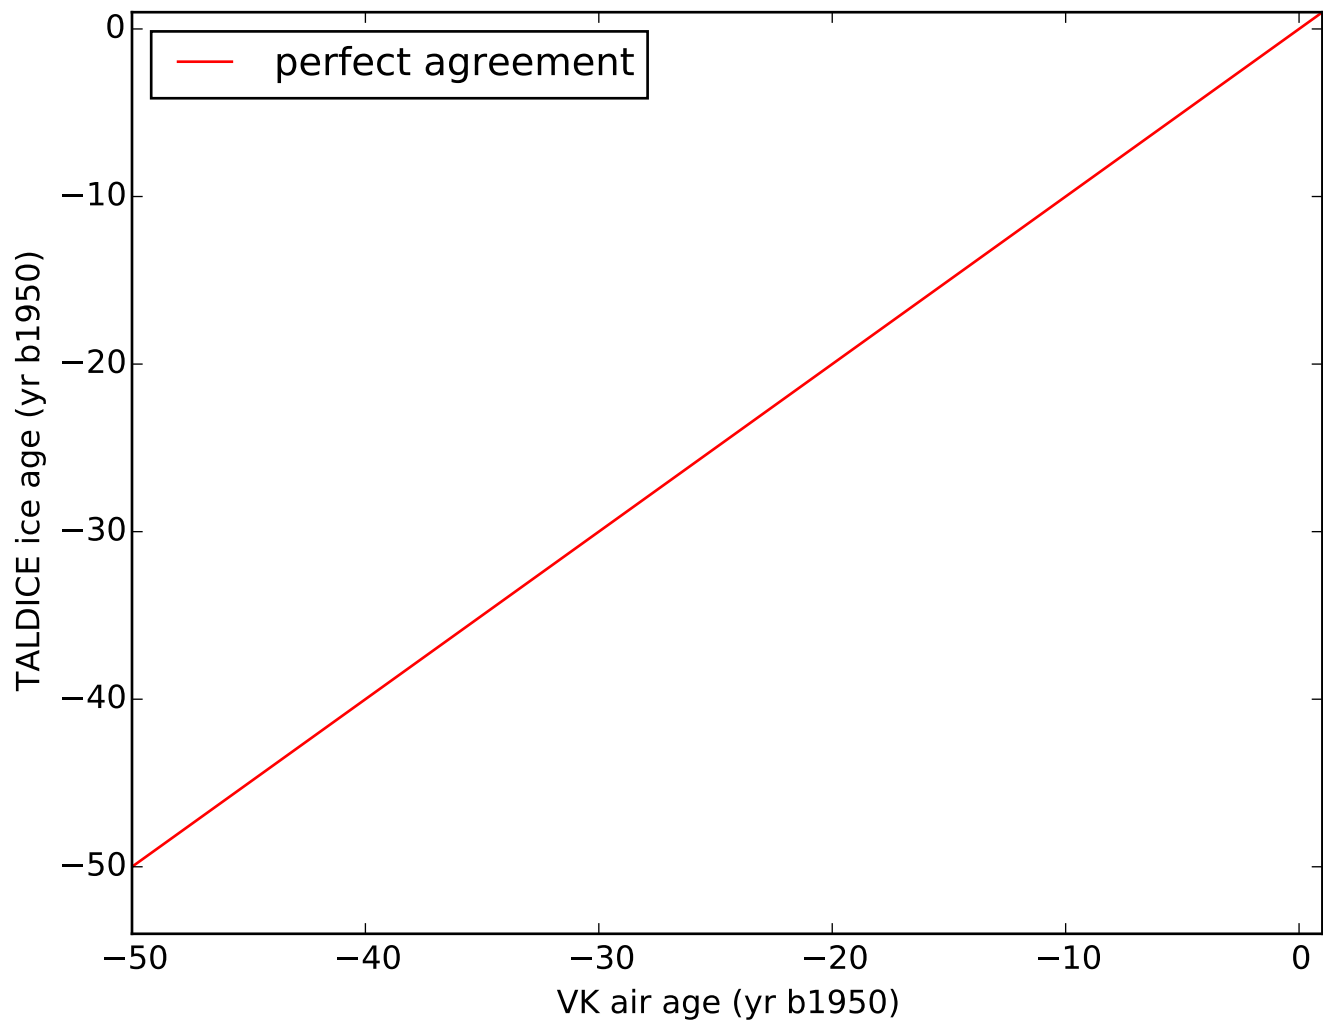

Supplement: Supplementary file 54 [file gmd-8-1473-2015-supplement.zip]

EDML ice layer thickness

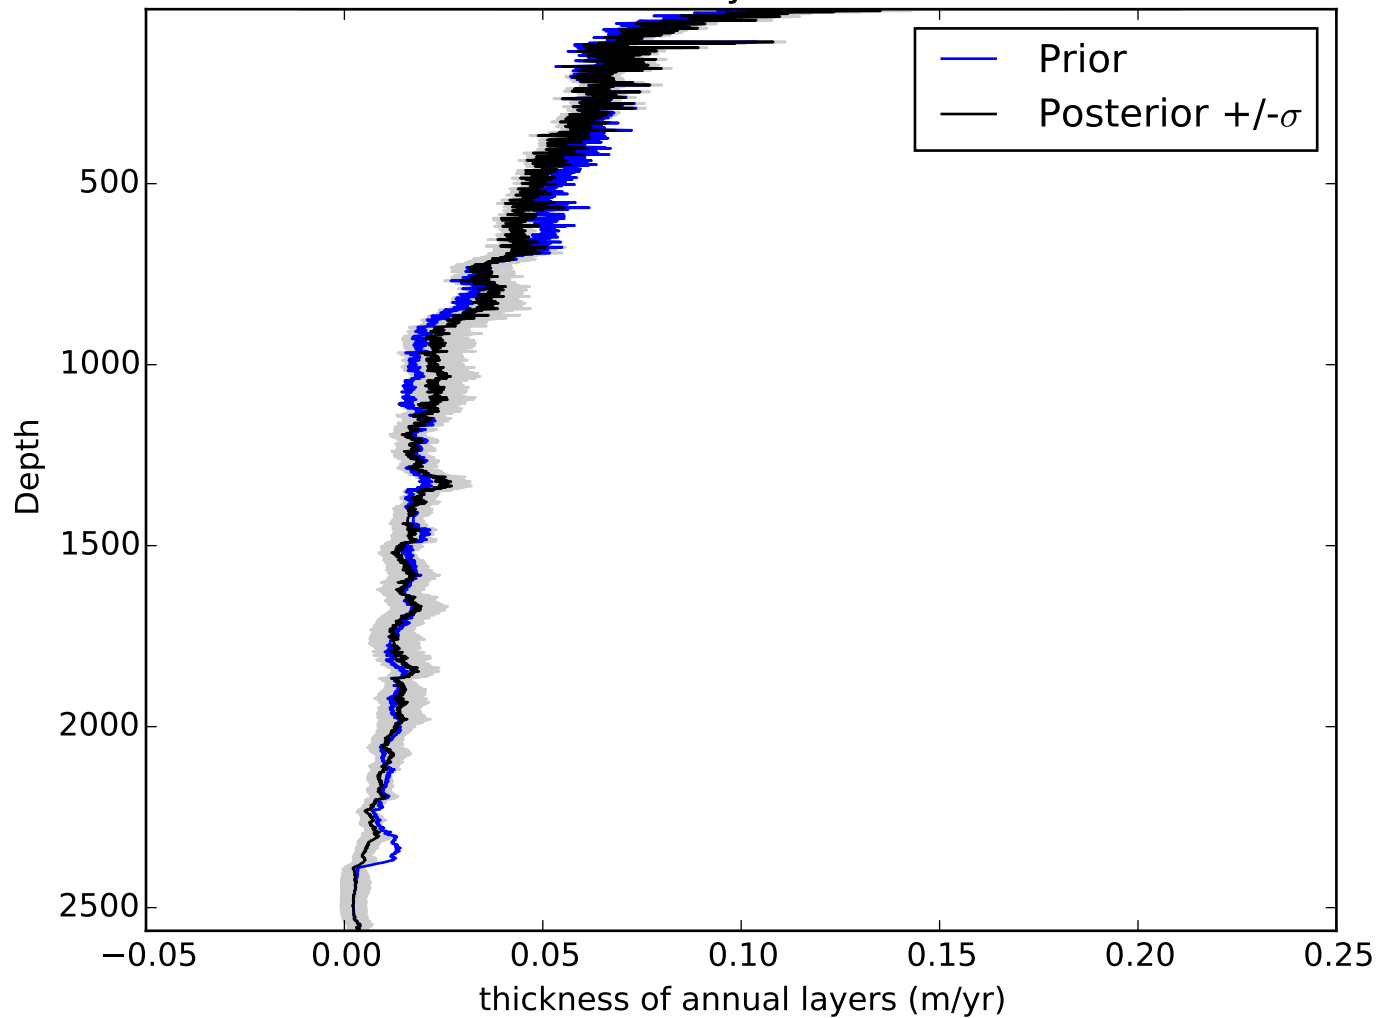

Supplement: Supplementary file 55 [file gmd-8-1473-2015-supplement.zip]

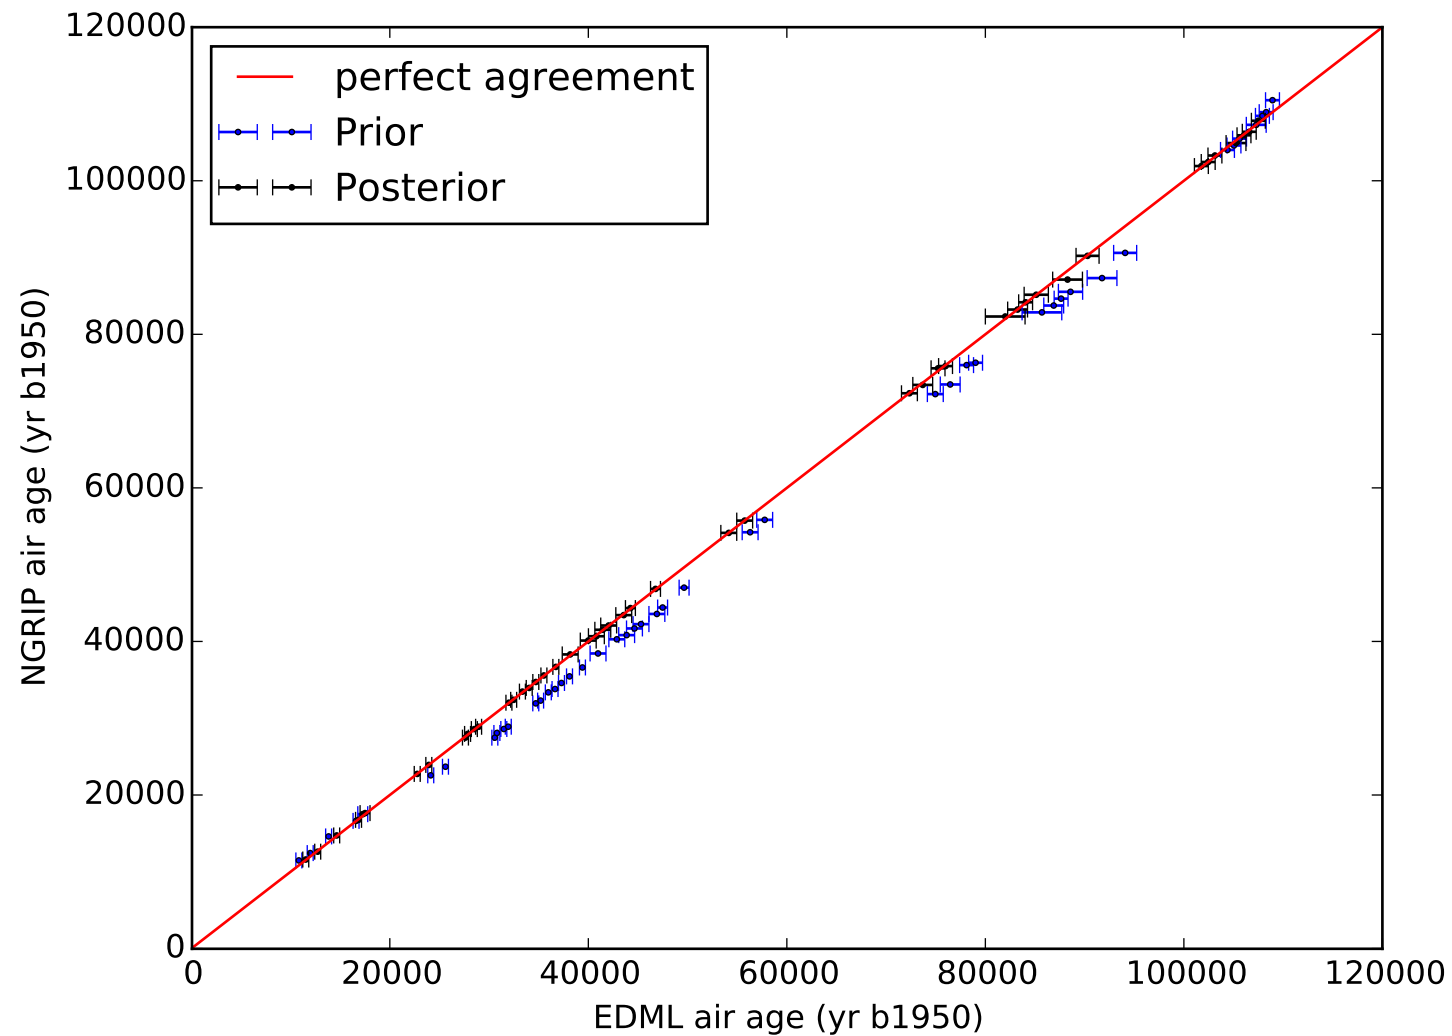

Supplement: Supplementary file 56 [file gmd-8-1473-2015-supplement.zip]

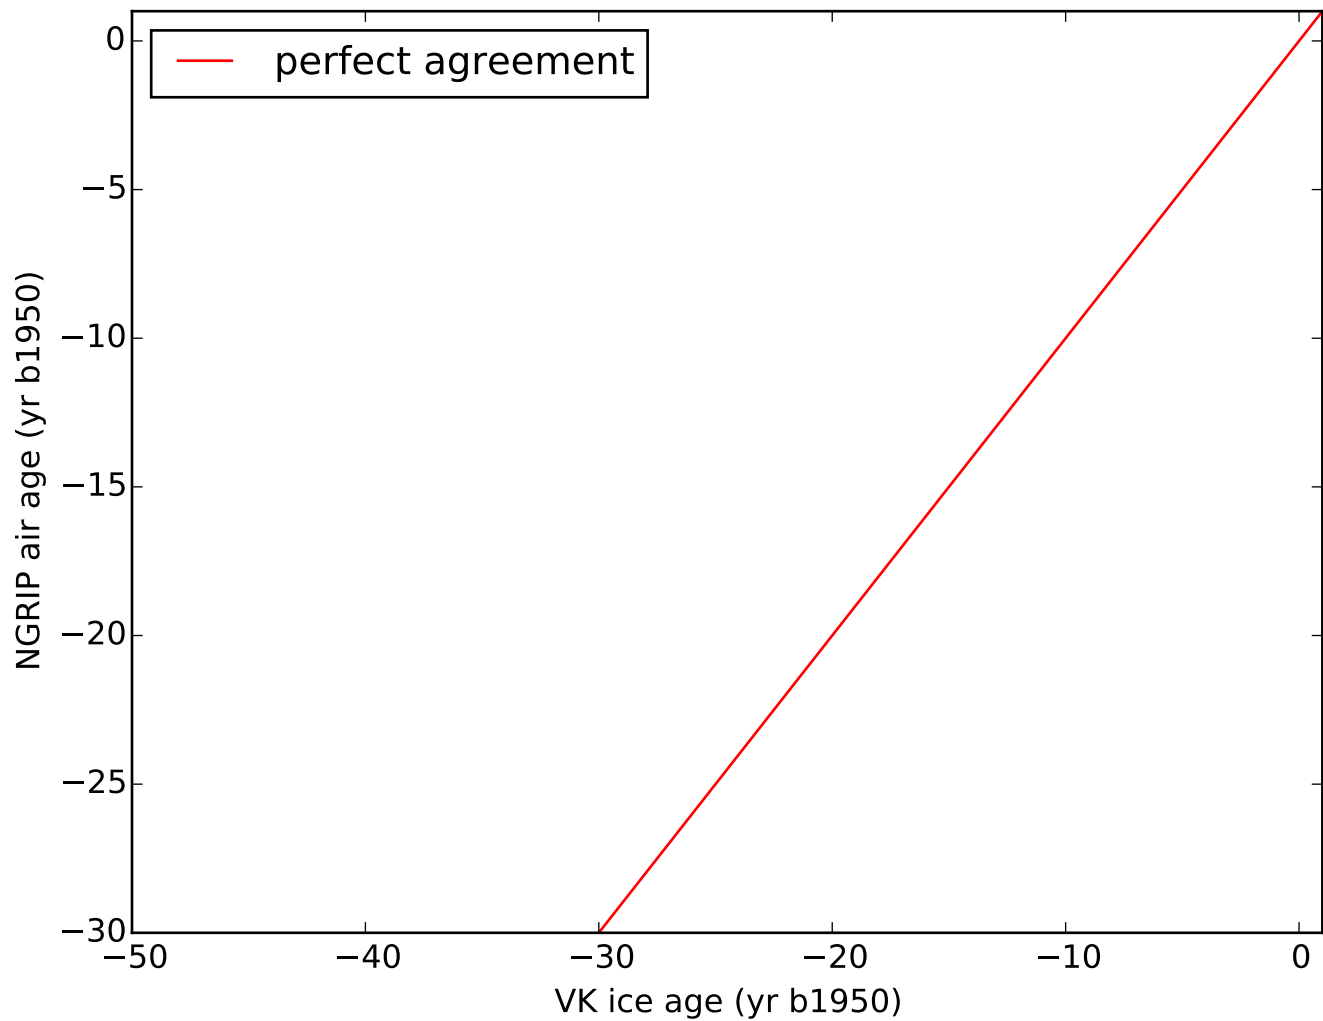

Supplement: Supplementary file 57 [file gmd-8-1473-2015-supplement.zip]

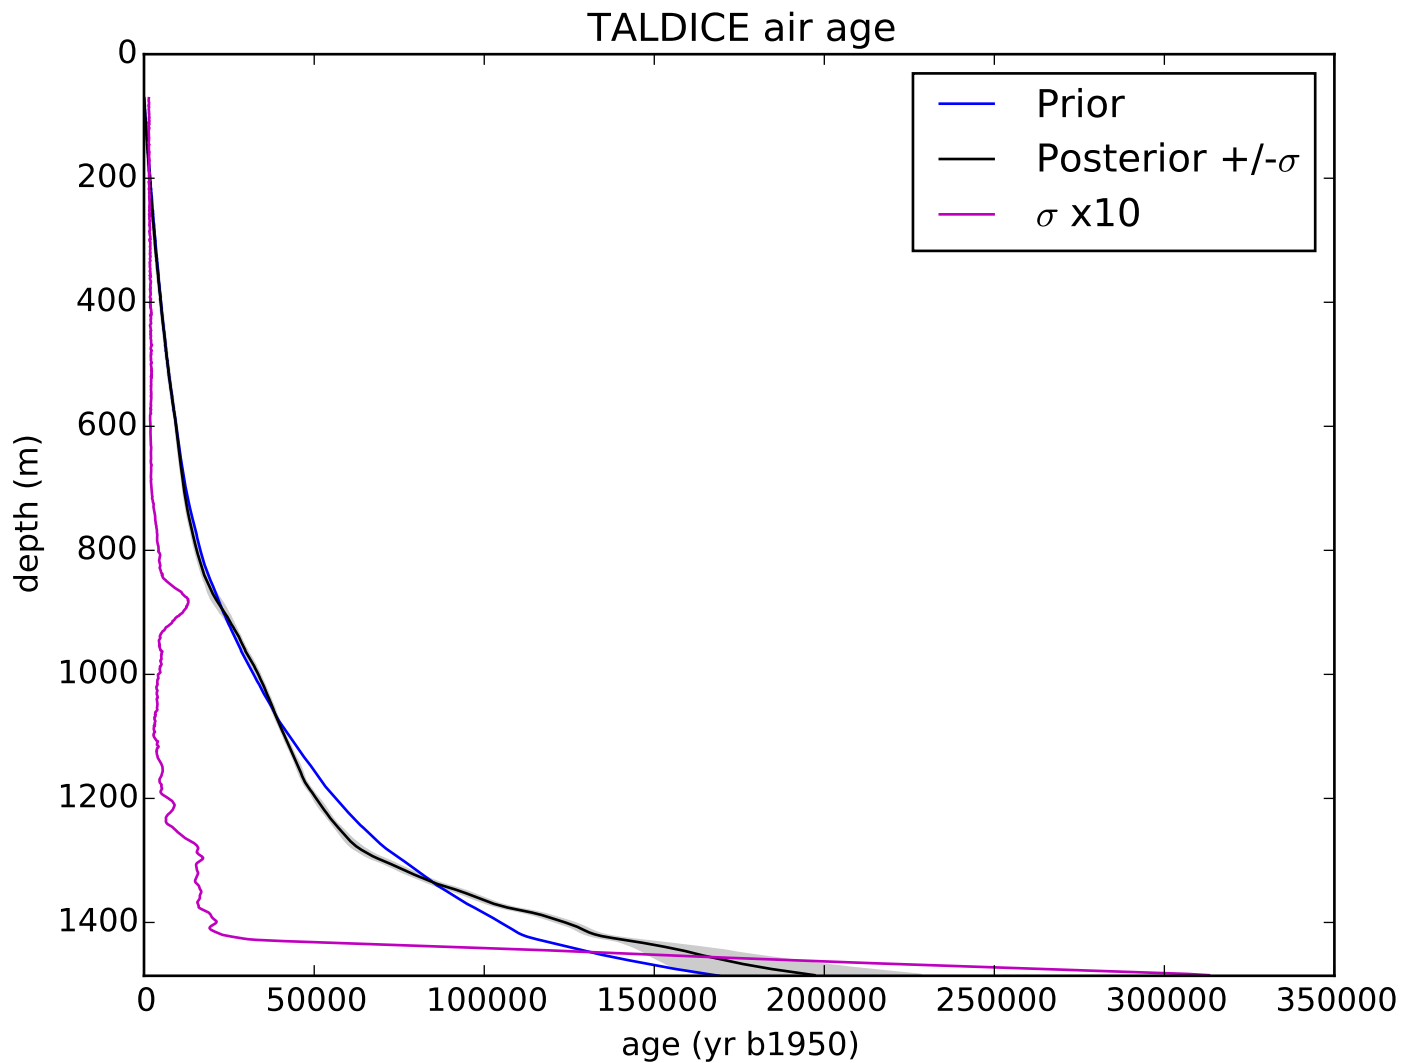

Supplement: Supplementary file 58 [file gmd-8-1473-2015-supplement.zip]

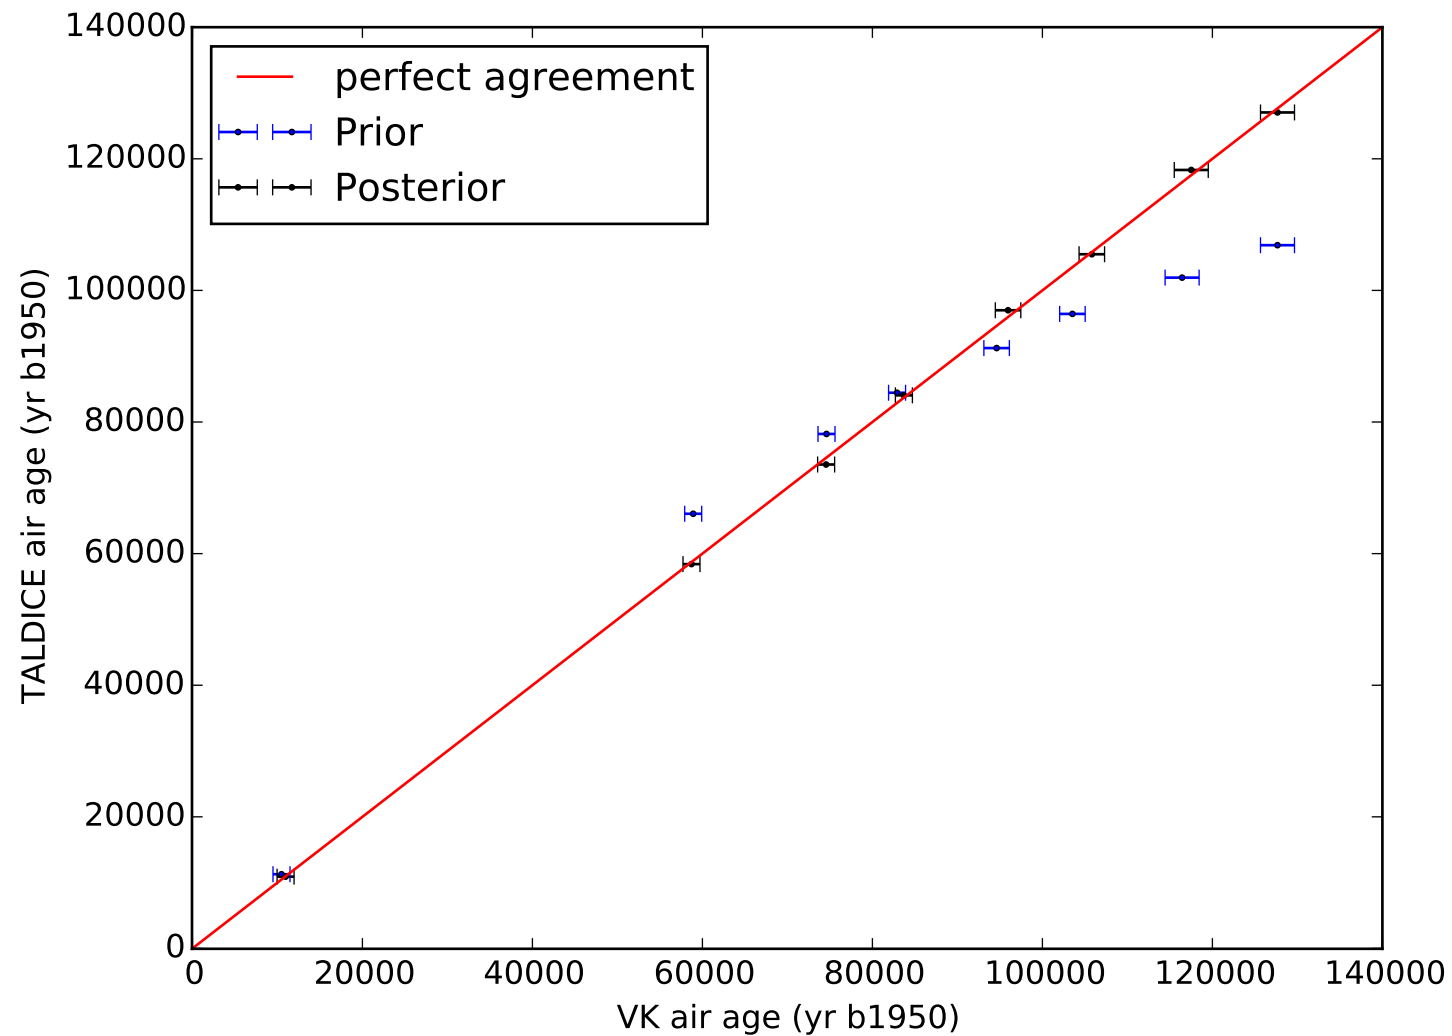

Supplement: Supplementary file 59 [file gmd-8-1473-2015-supplement.zip]

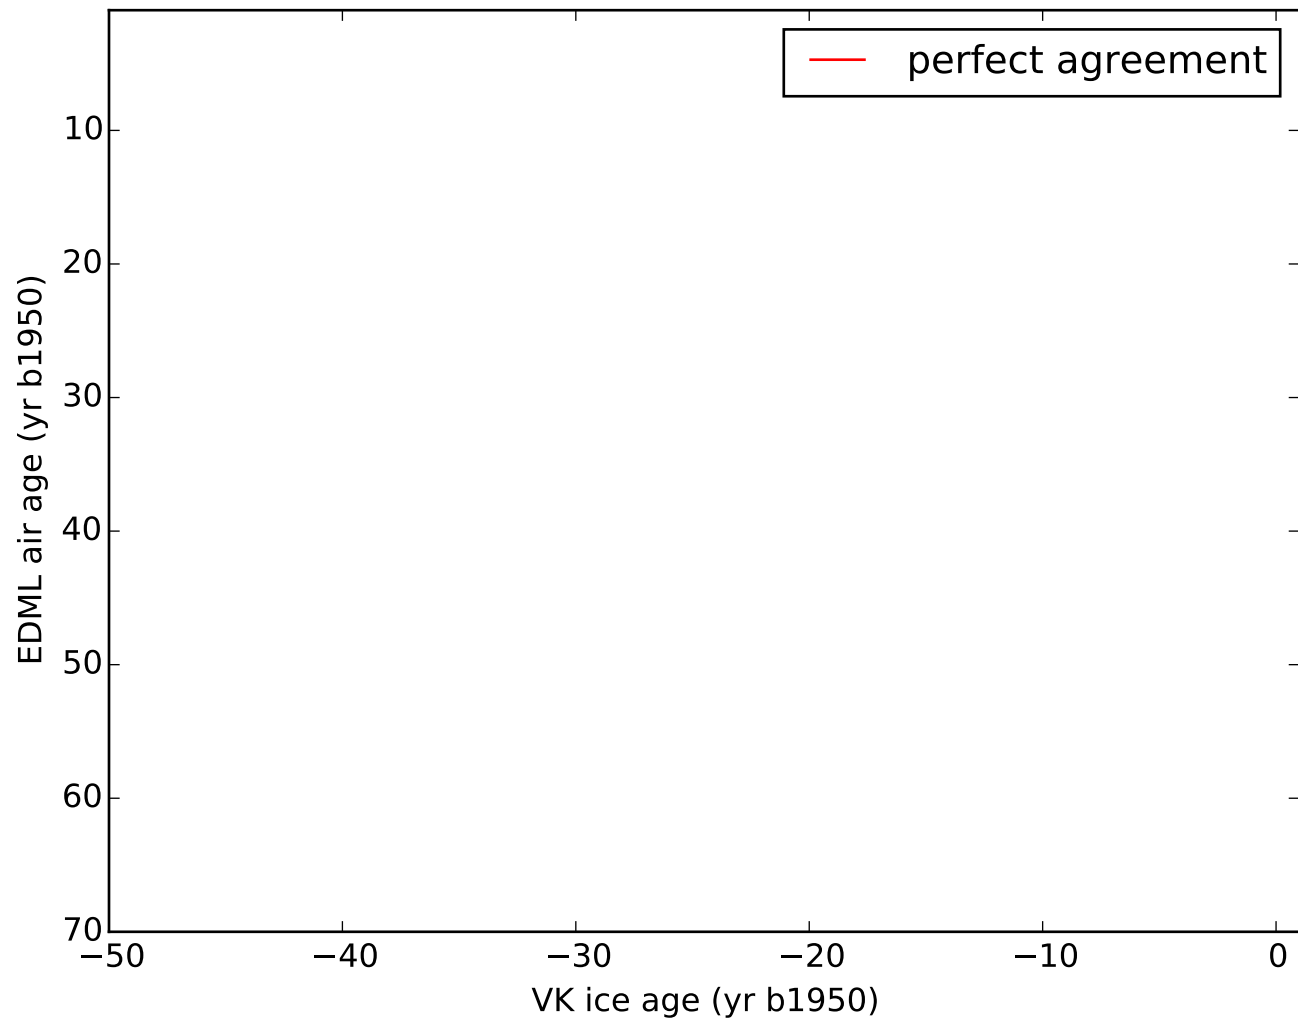

Supplement: Supplementary file 60 [file gmd-8-1473-2015-supplement.zip]

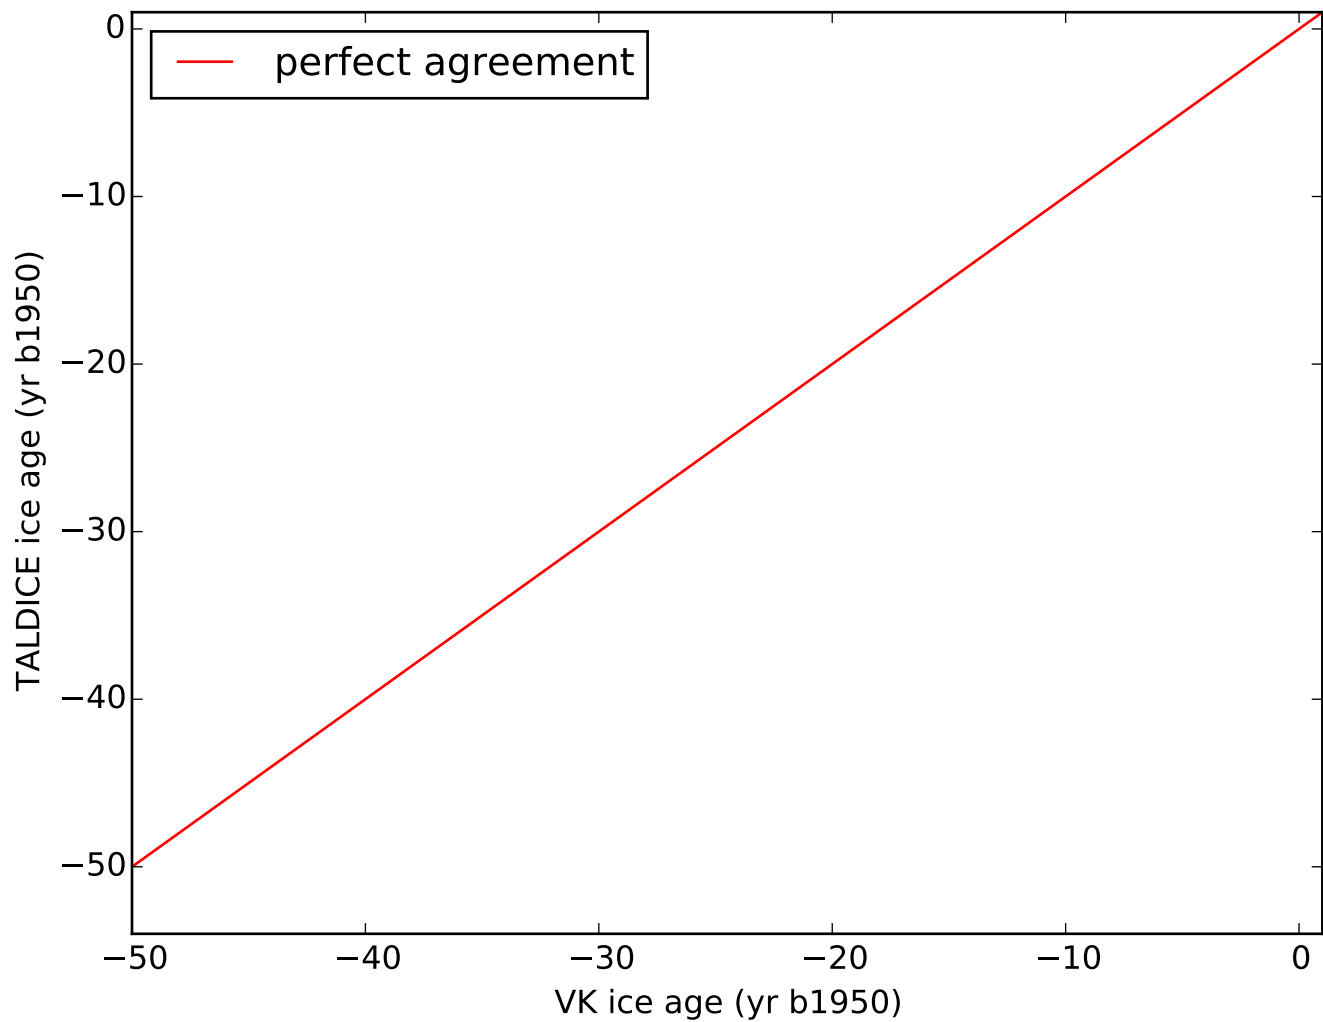

Supplement: Supplementary file 61 [file gmd-8-1473-2015-supplement.zip]

# NGRIP air age

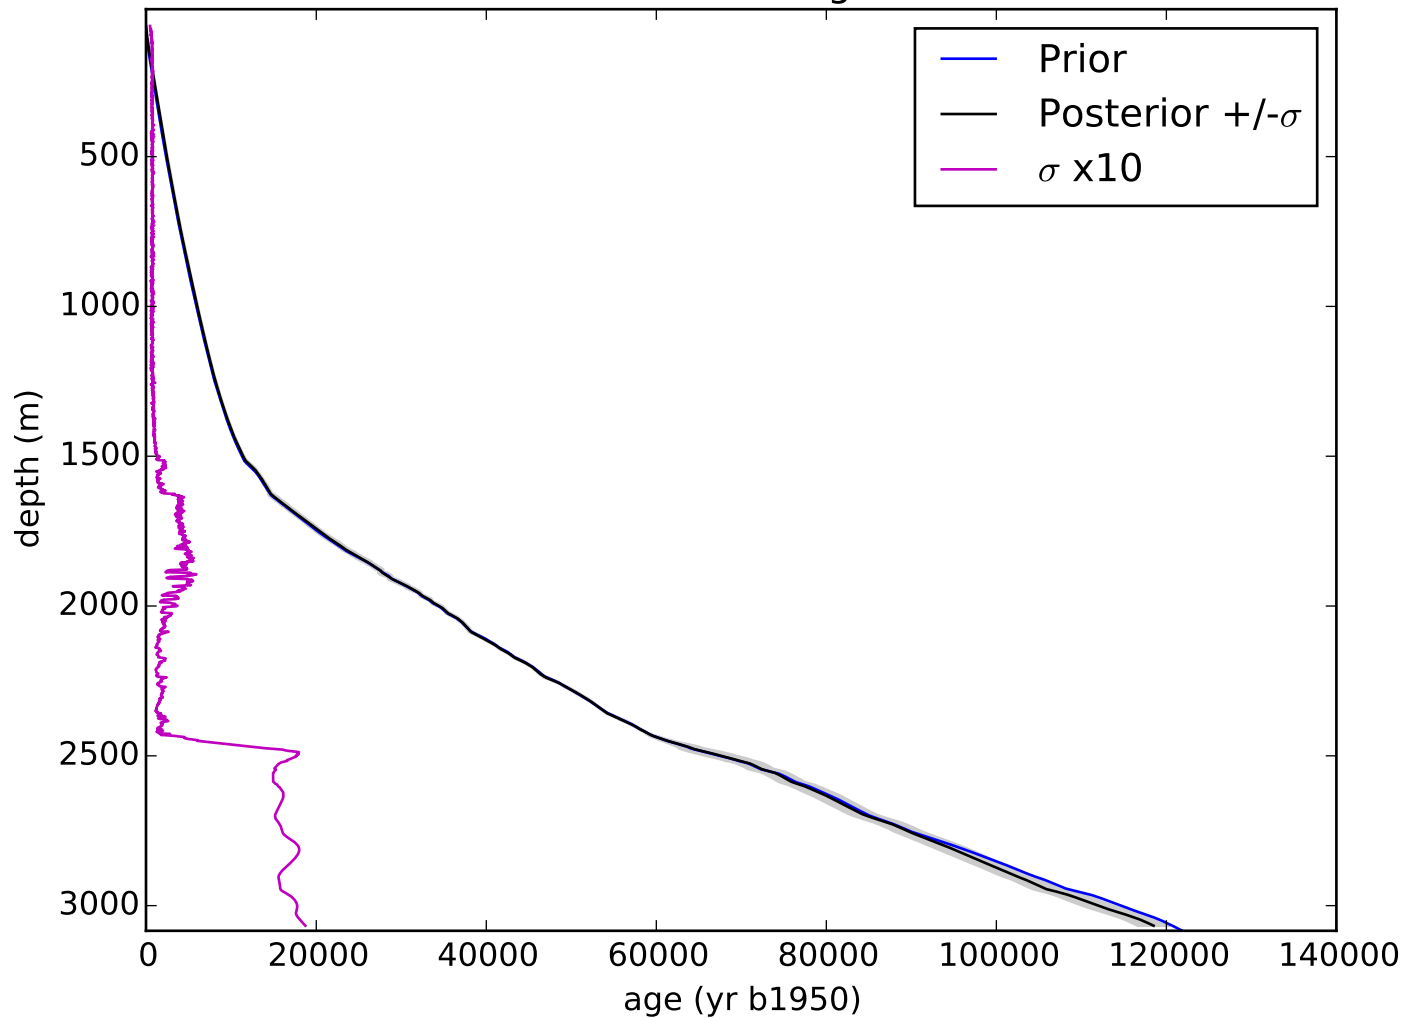

Supplement: Supplementary file 63 [file gmd-8-1473-2015-supplement.zip]

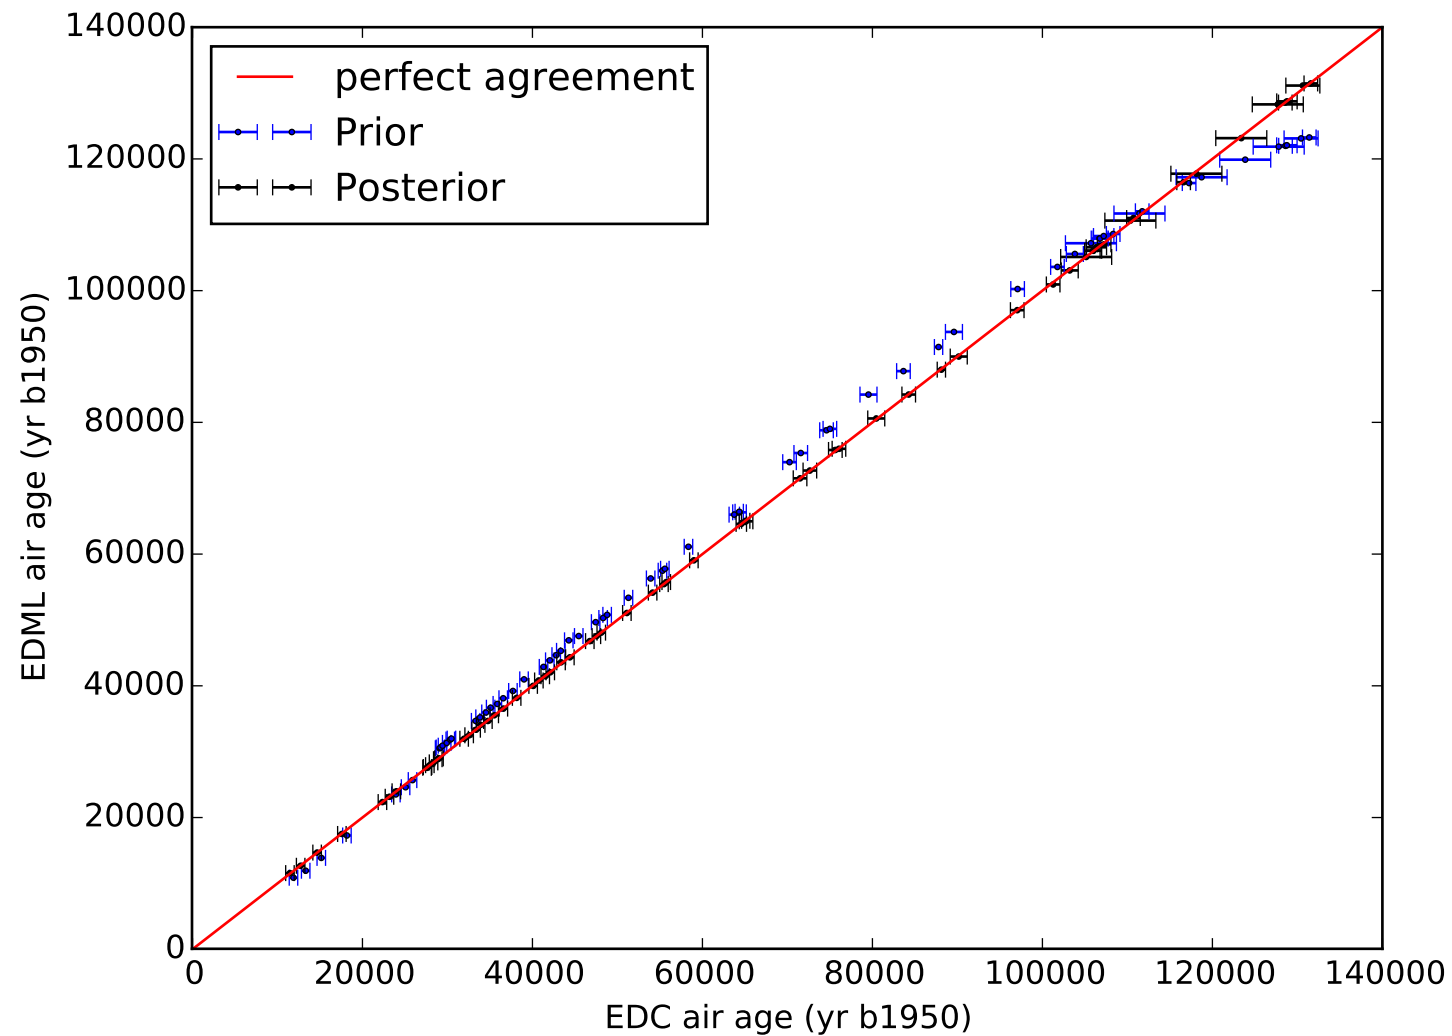

Supplement: Supplementary file 64 [file gmd-8-1473-2015-supplement.zip]

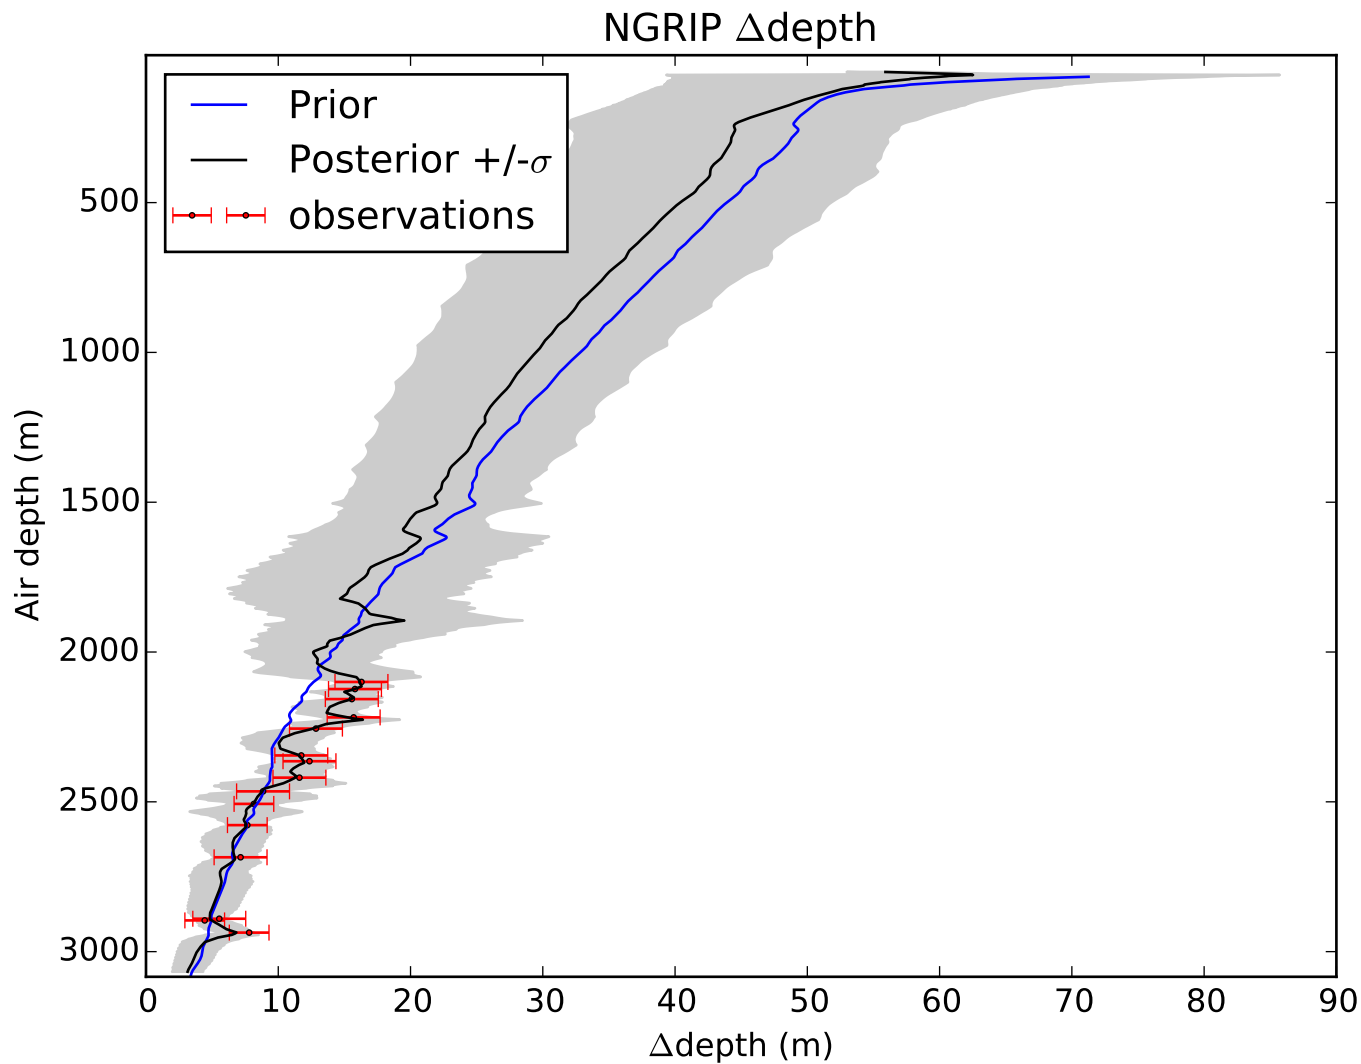

Supplement: Supplementary file 65 [file gmd-8-1473-2015-supplement.zip]

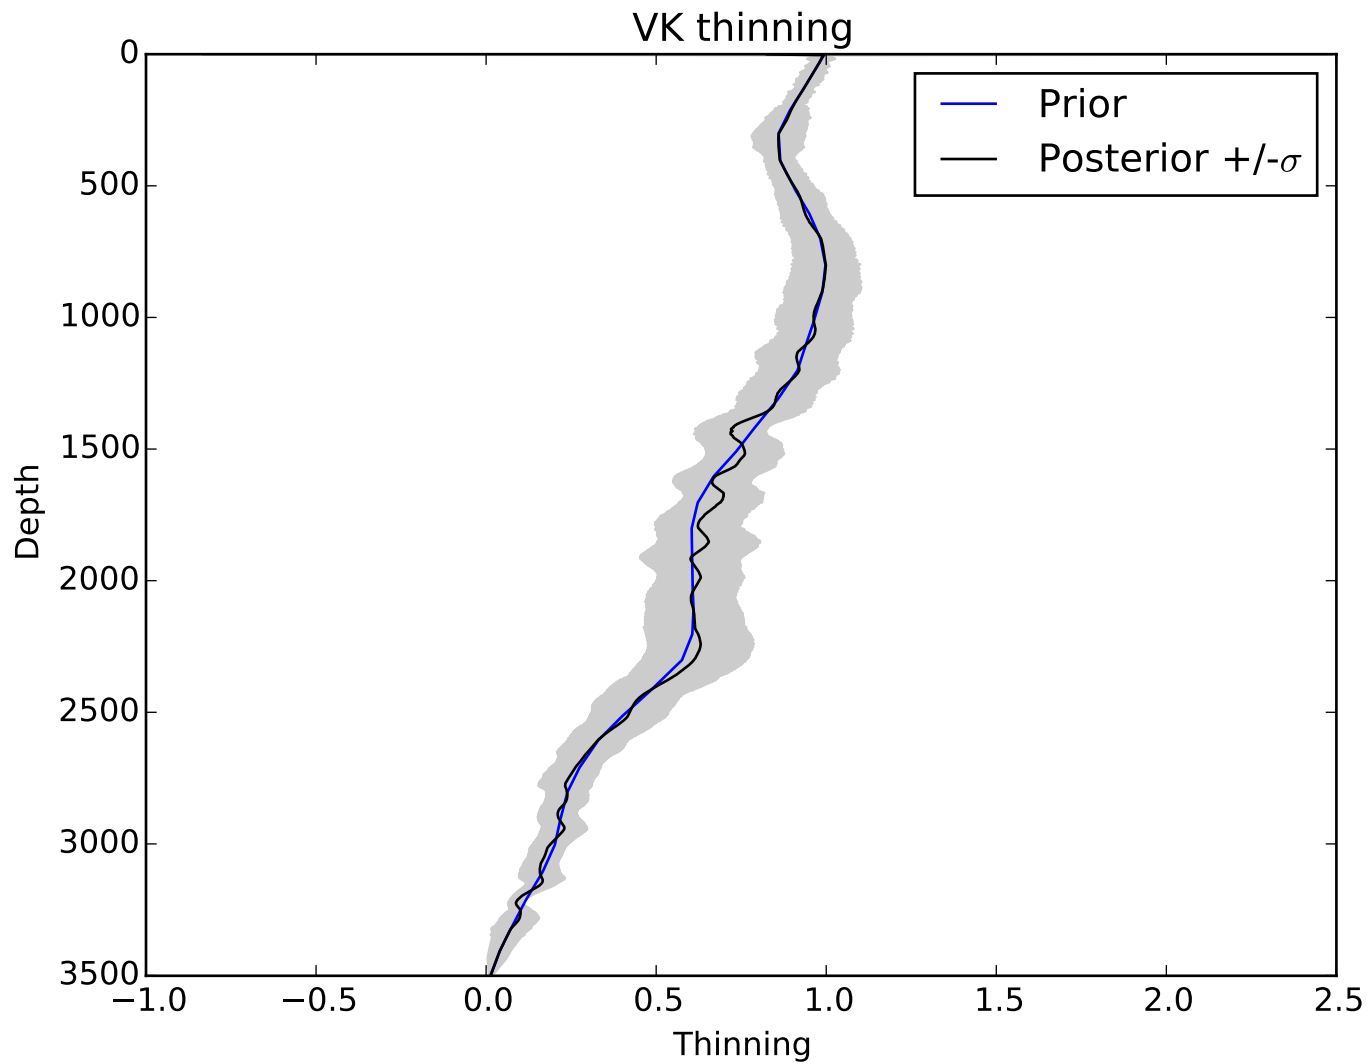

Supplement: Supplementary file 66 [file gmd-8-1473-2015-supplement.zip]

# NGRIP LID

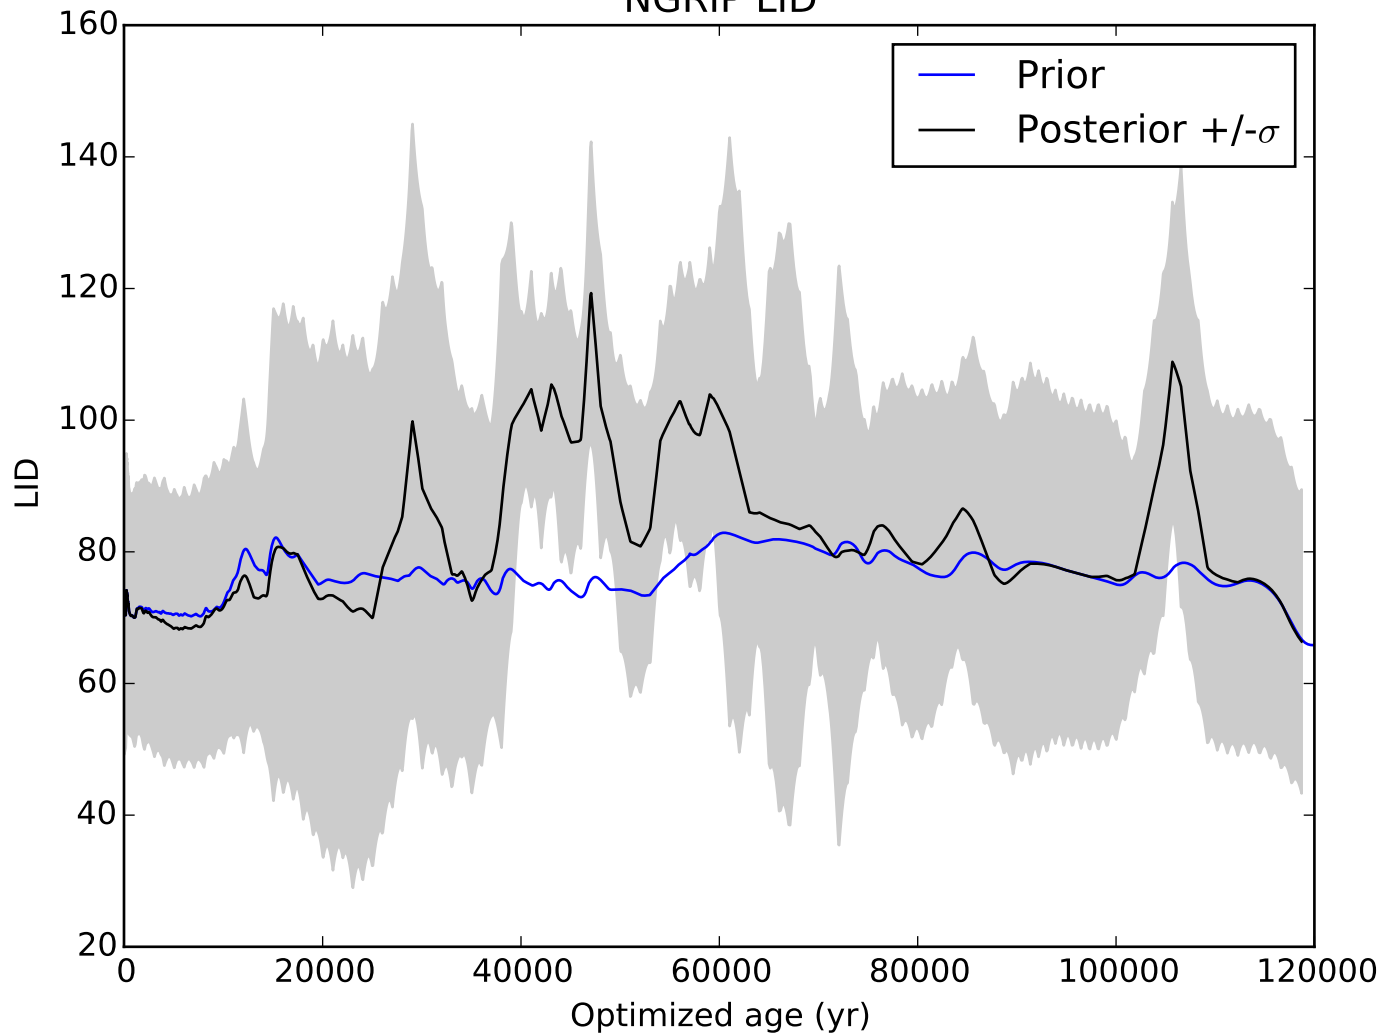

Supplement: Supplementary file 68 [file gmd-8-1473-2015-supplement.zip]

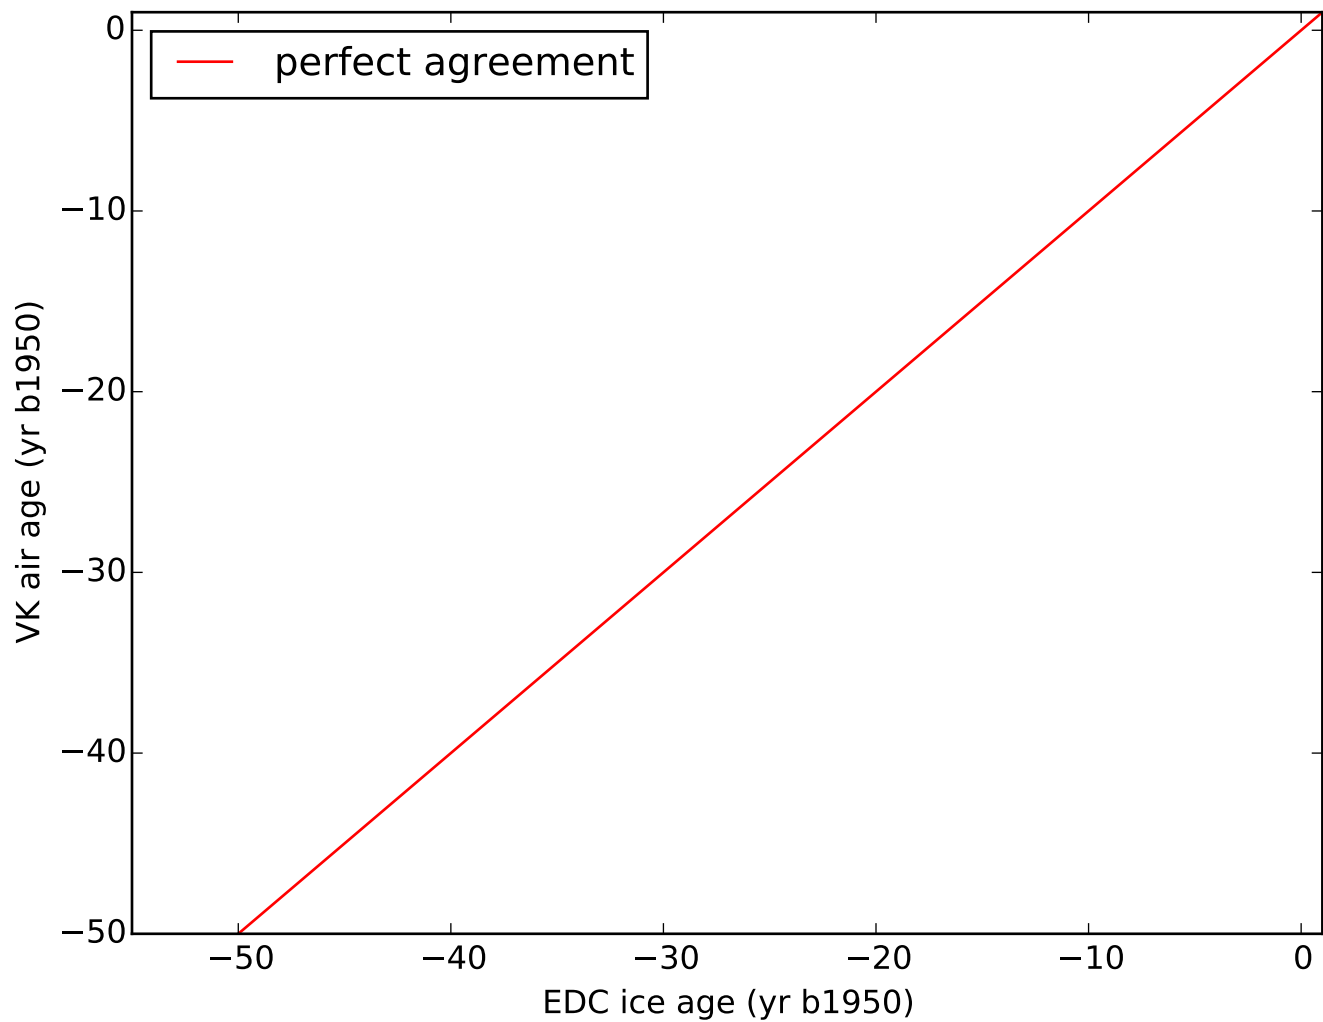

Supplement: Supplementary file 69 [file gmd-8-1473-2015-supplement.zip]

# NGRIP ice age

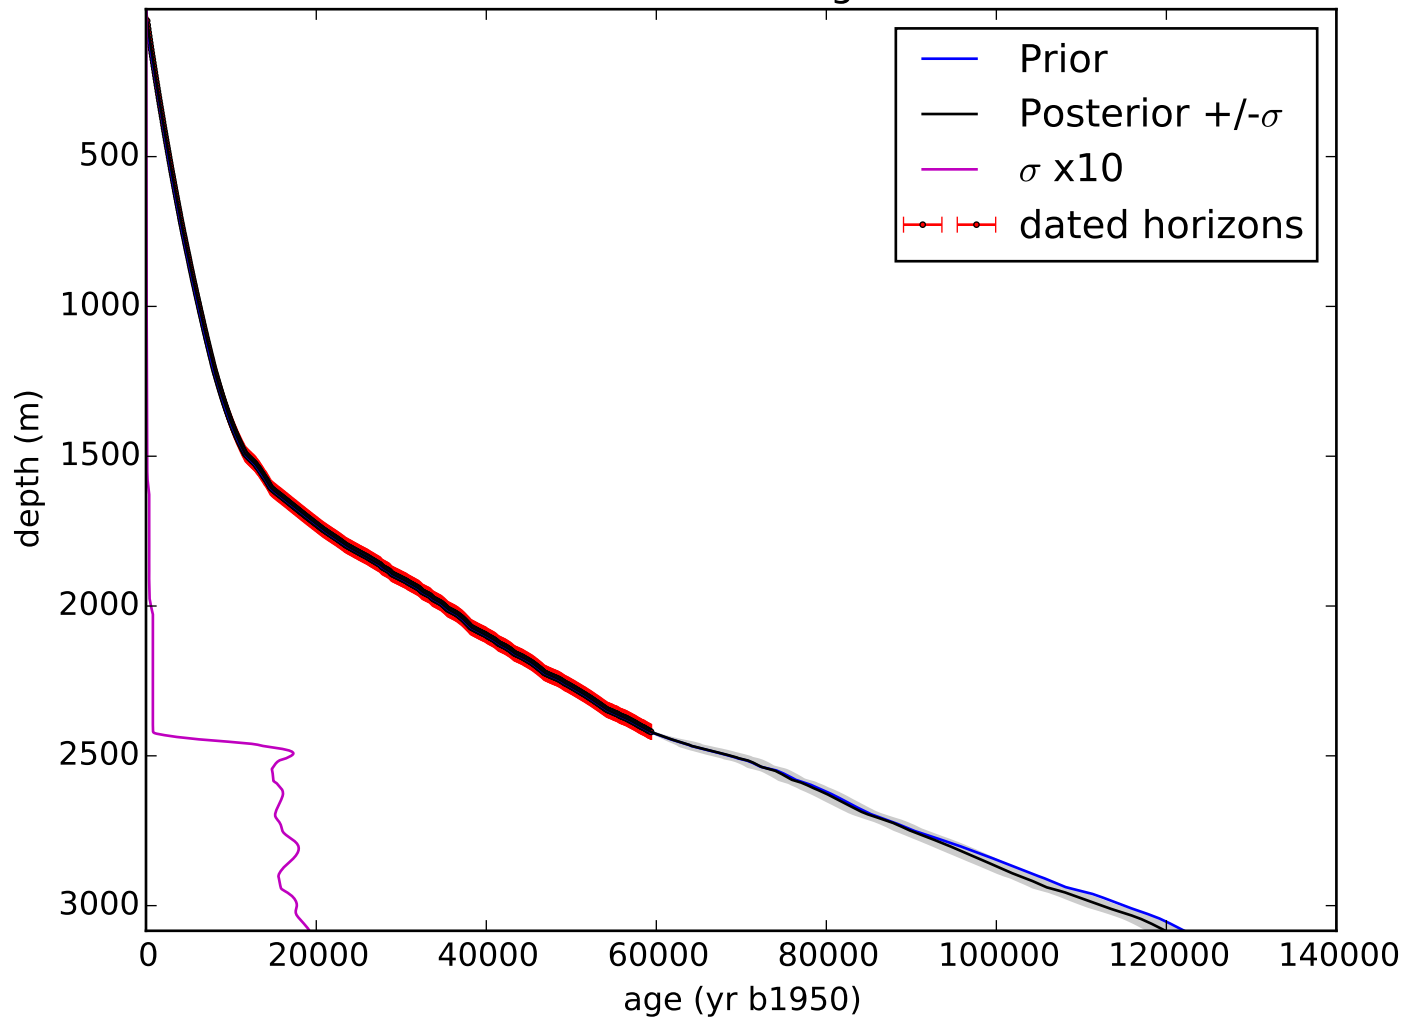

Supplement: Supplementary file 70 [file gmd-8-1473-2015-supplement.zip]

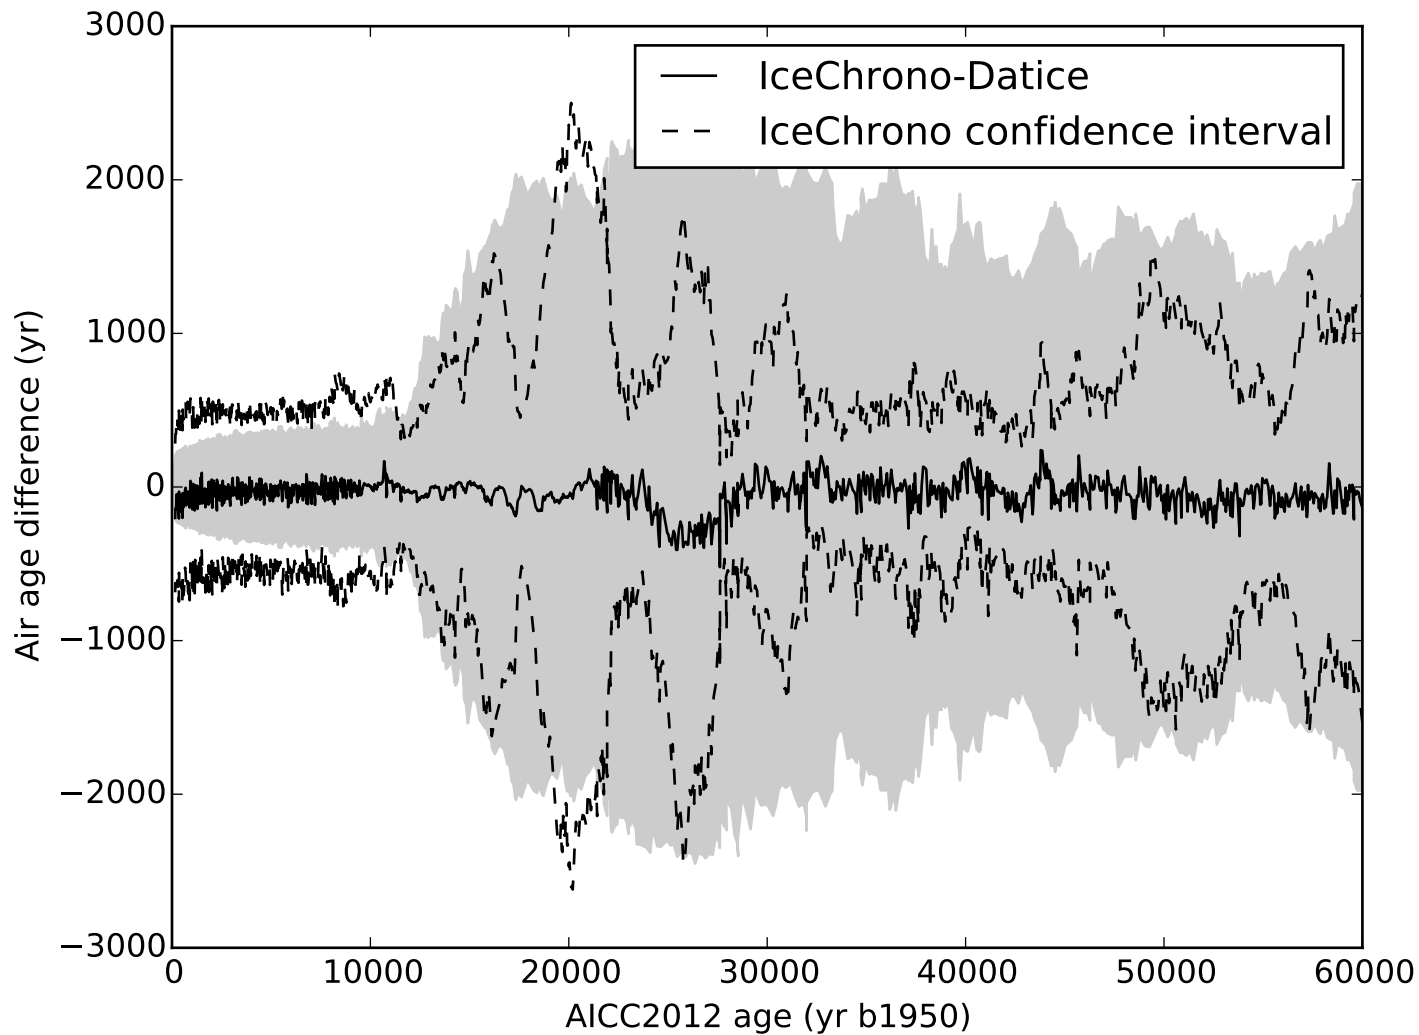

Supplement: Supplementary file 71 [file gmd-8-1473-2015-supplement.zip]

# VK LID

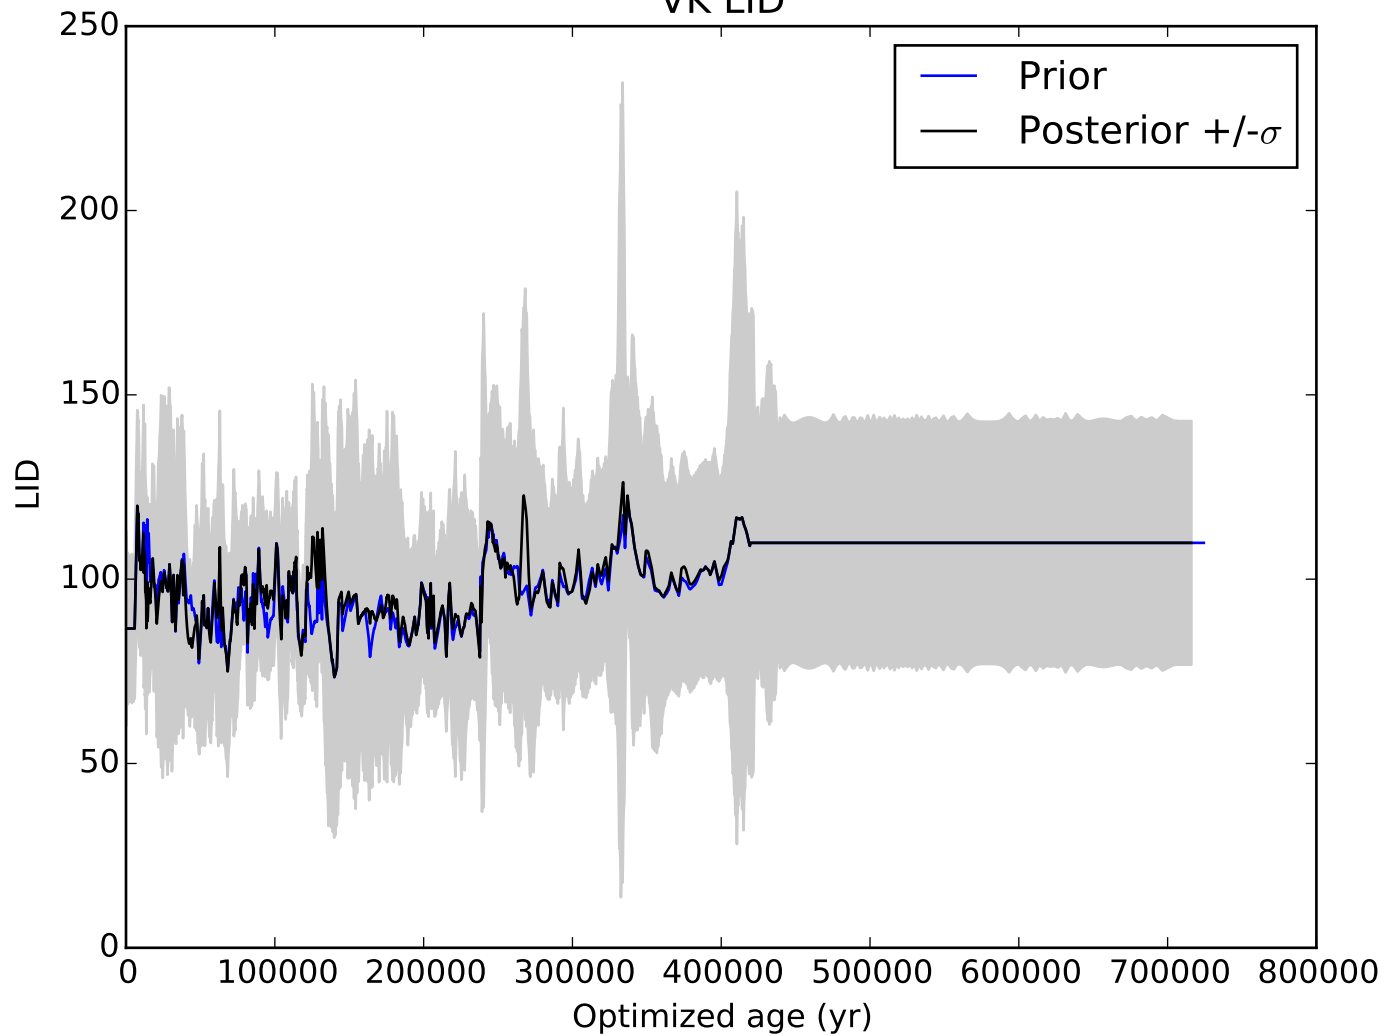

Supplement: Supplementary file 72 [file gmd-8-1473-2015-supplement.zip]

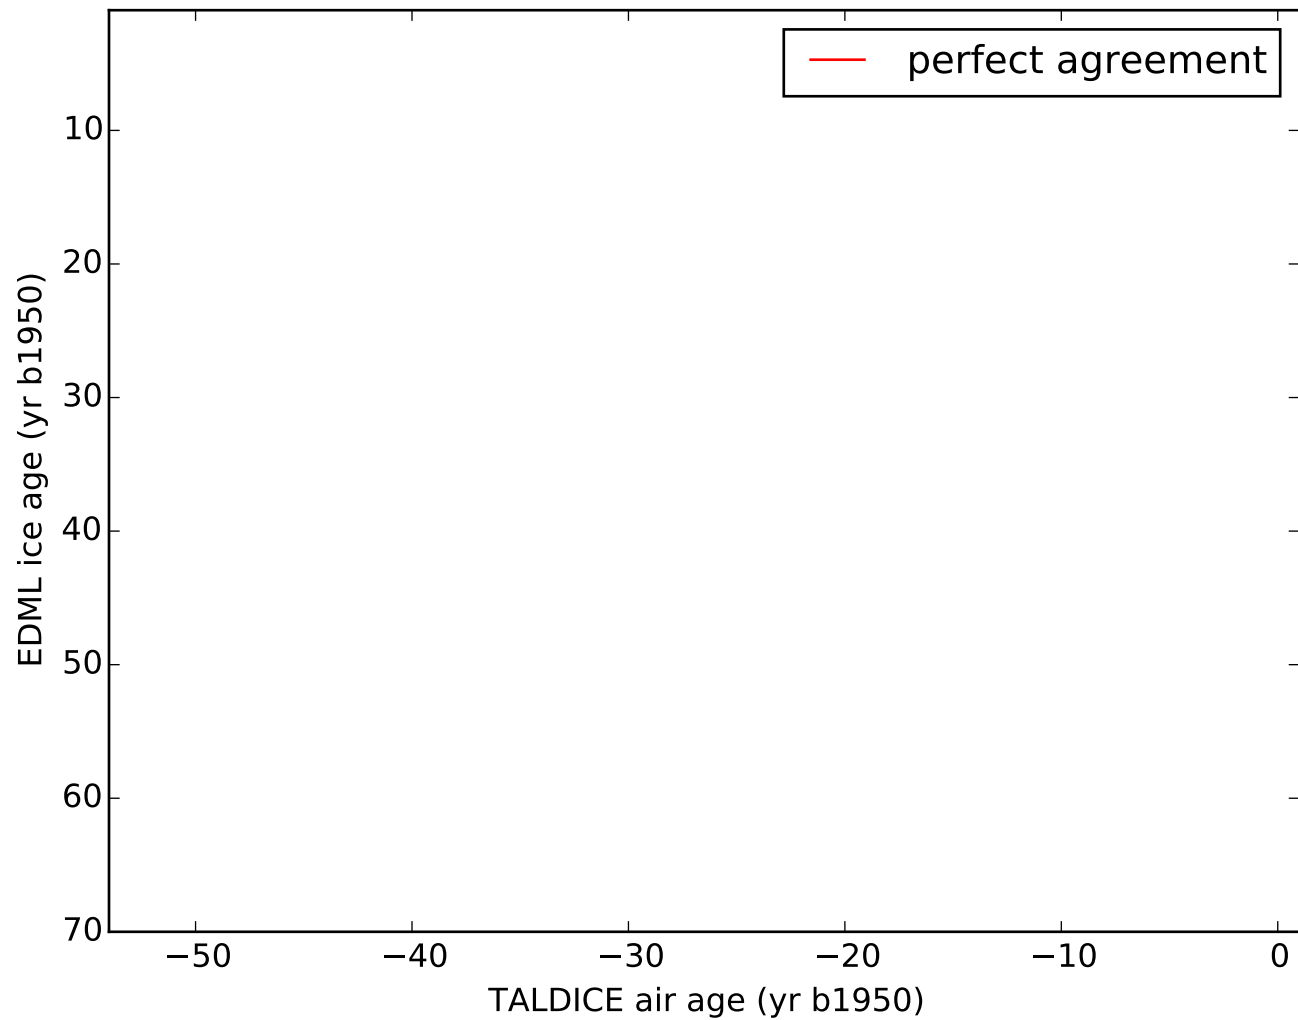

Supplement: Supplementary file 73 [file gmd-8-1473-2015-supplement.zip]

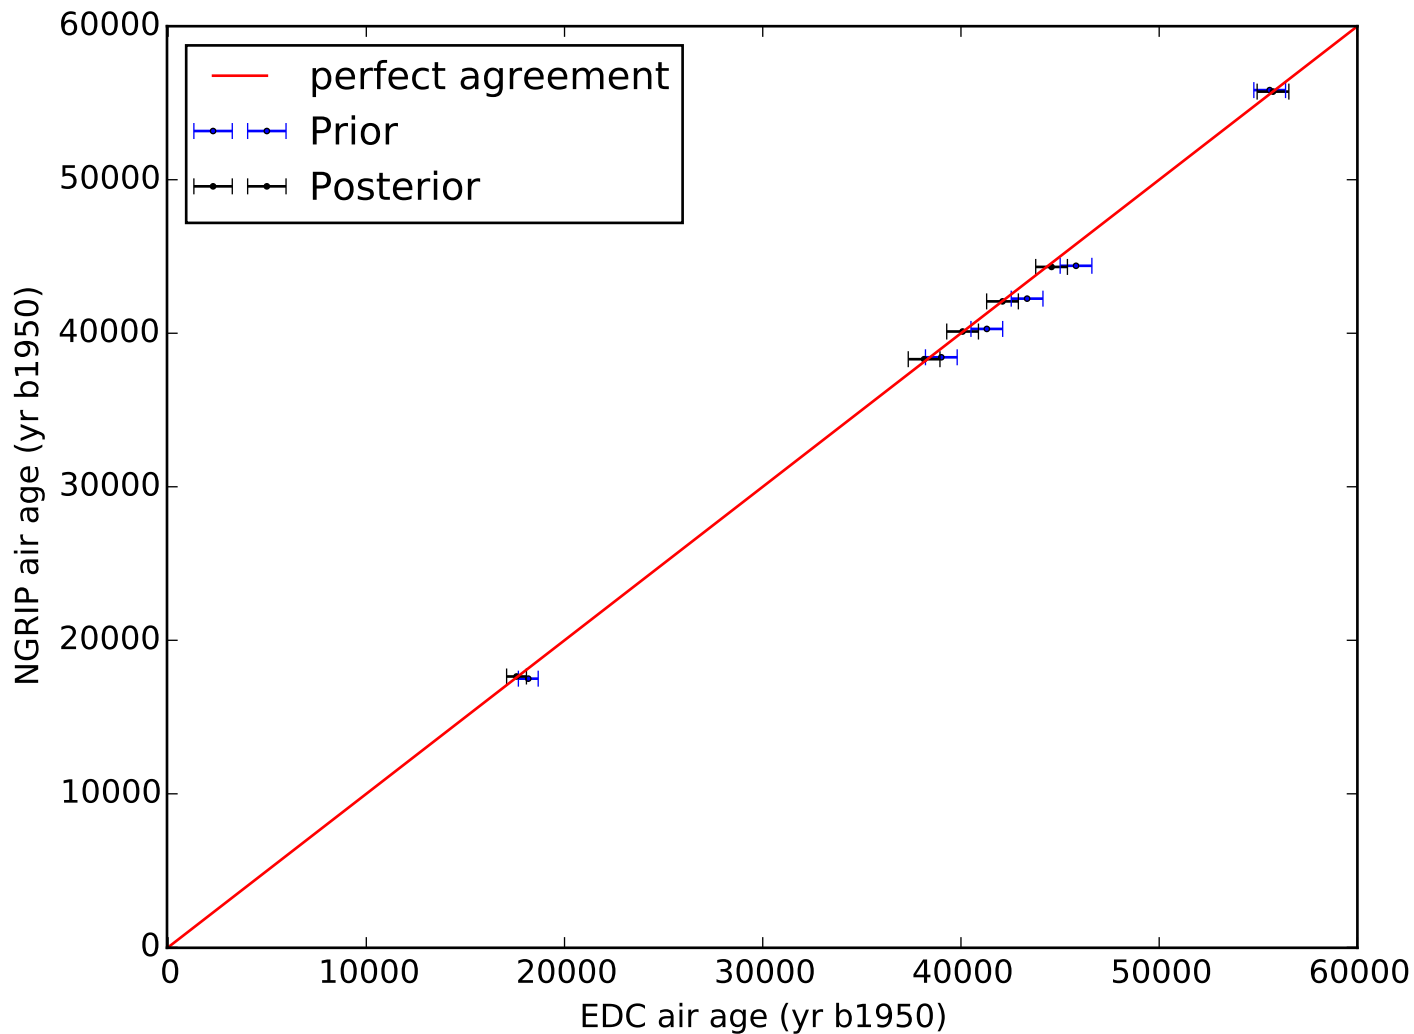

Supplement: Supplementary file 74 [file gmd-8-1473-2015-supplement.zip]

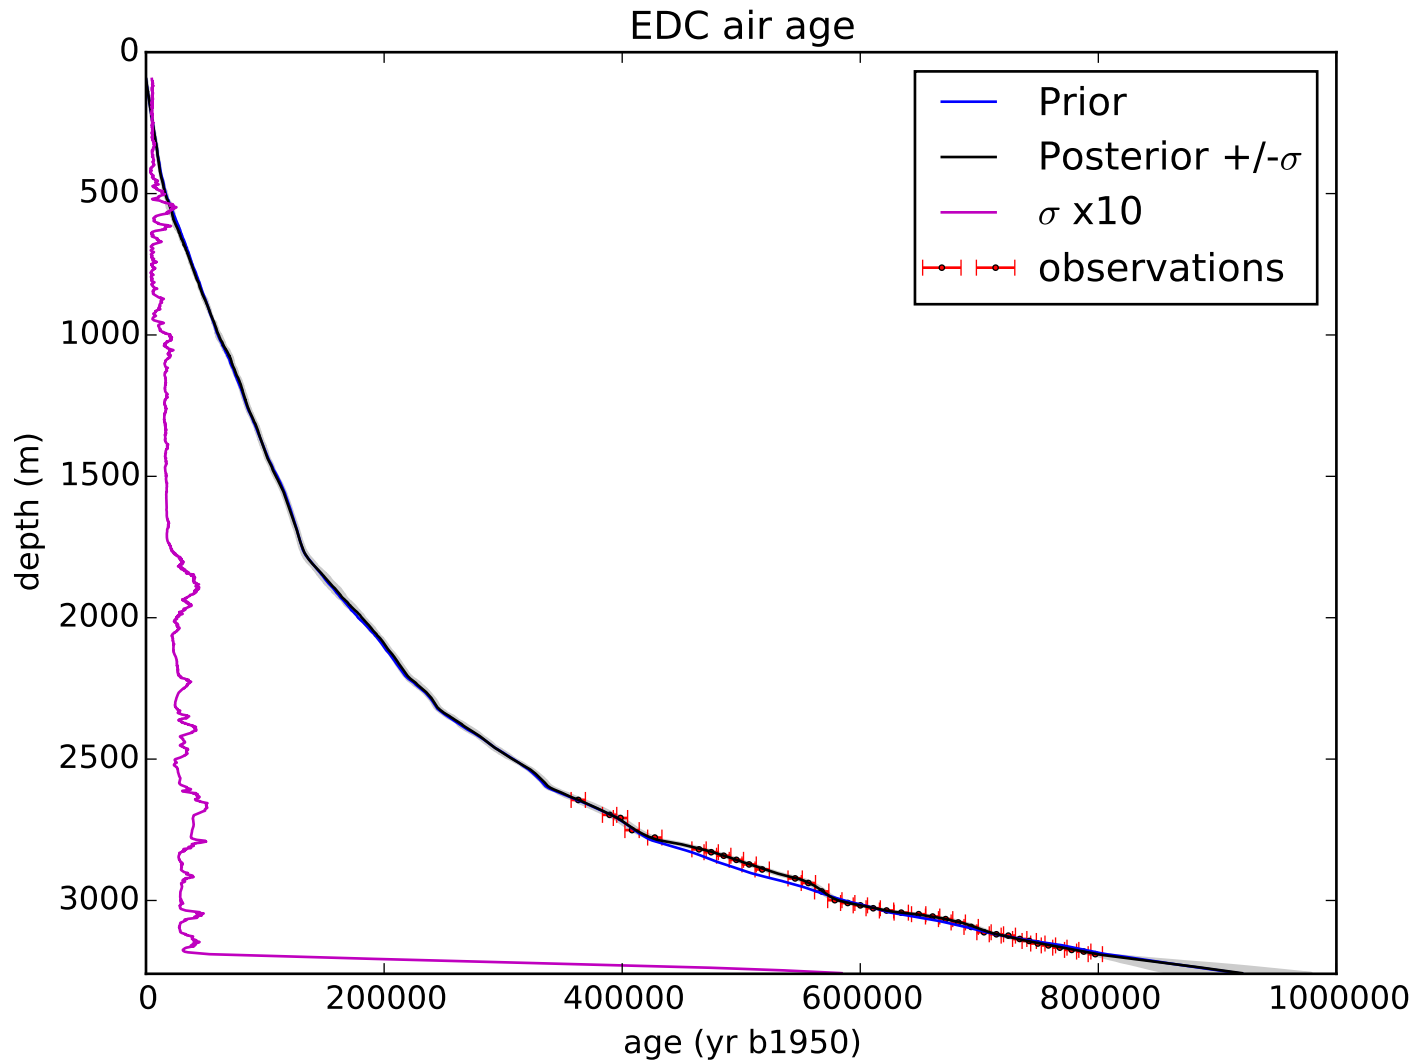

Supplement: Supplementary file 75 [file gmd-8-1473-2015-supplement.zip]

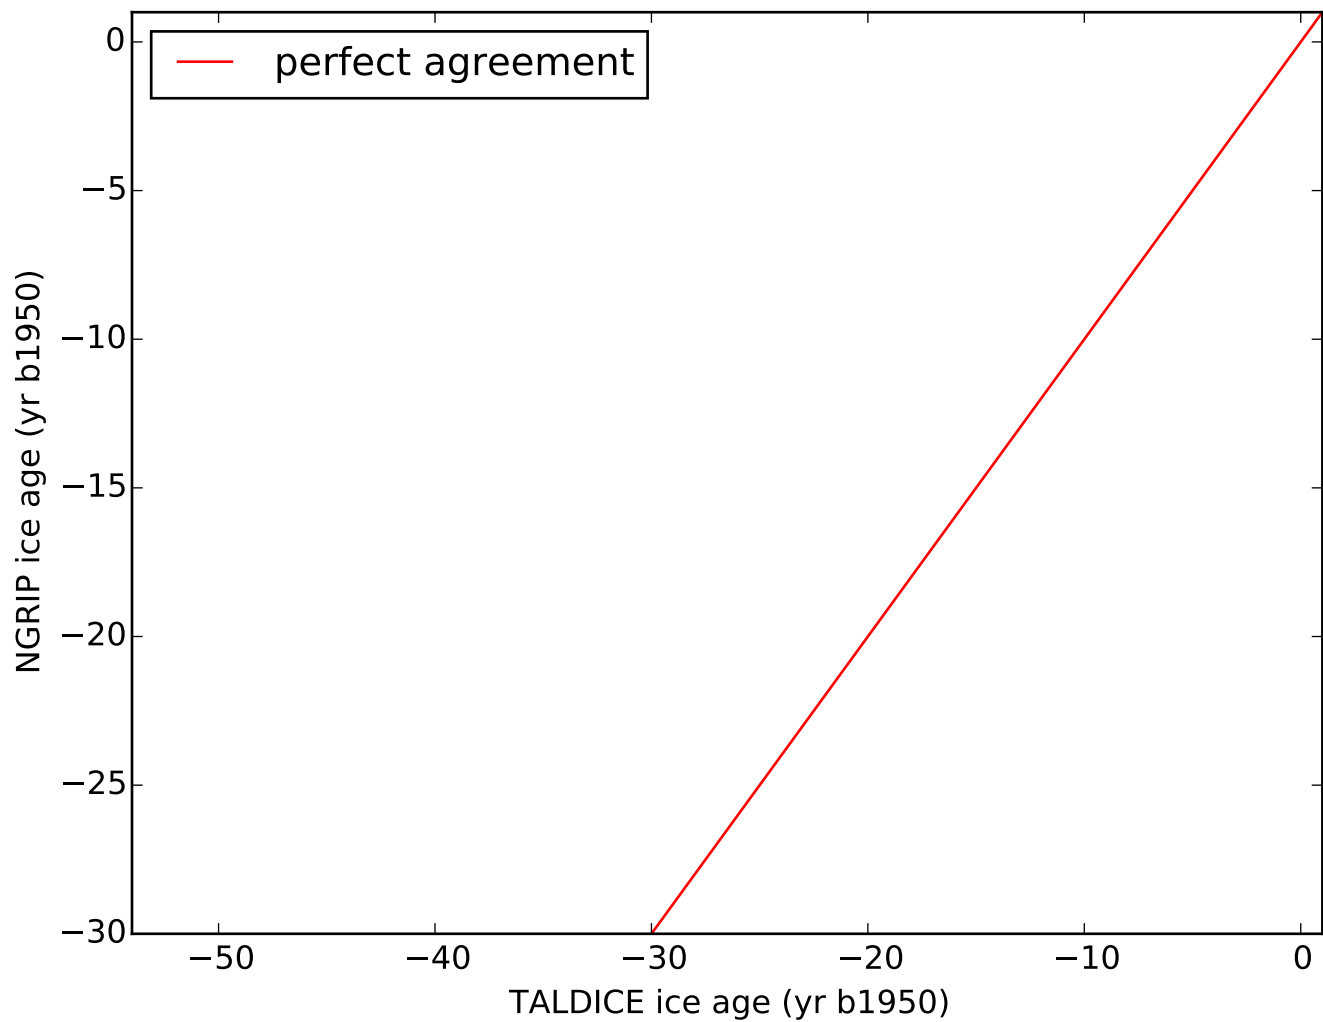

Supplement: Supplementary file 76 [file gmd-8-1473-2015-supplement.zip]

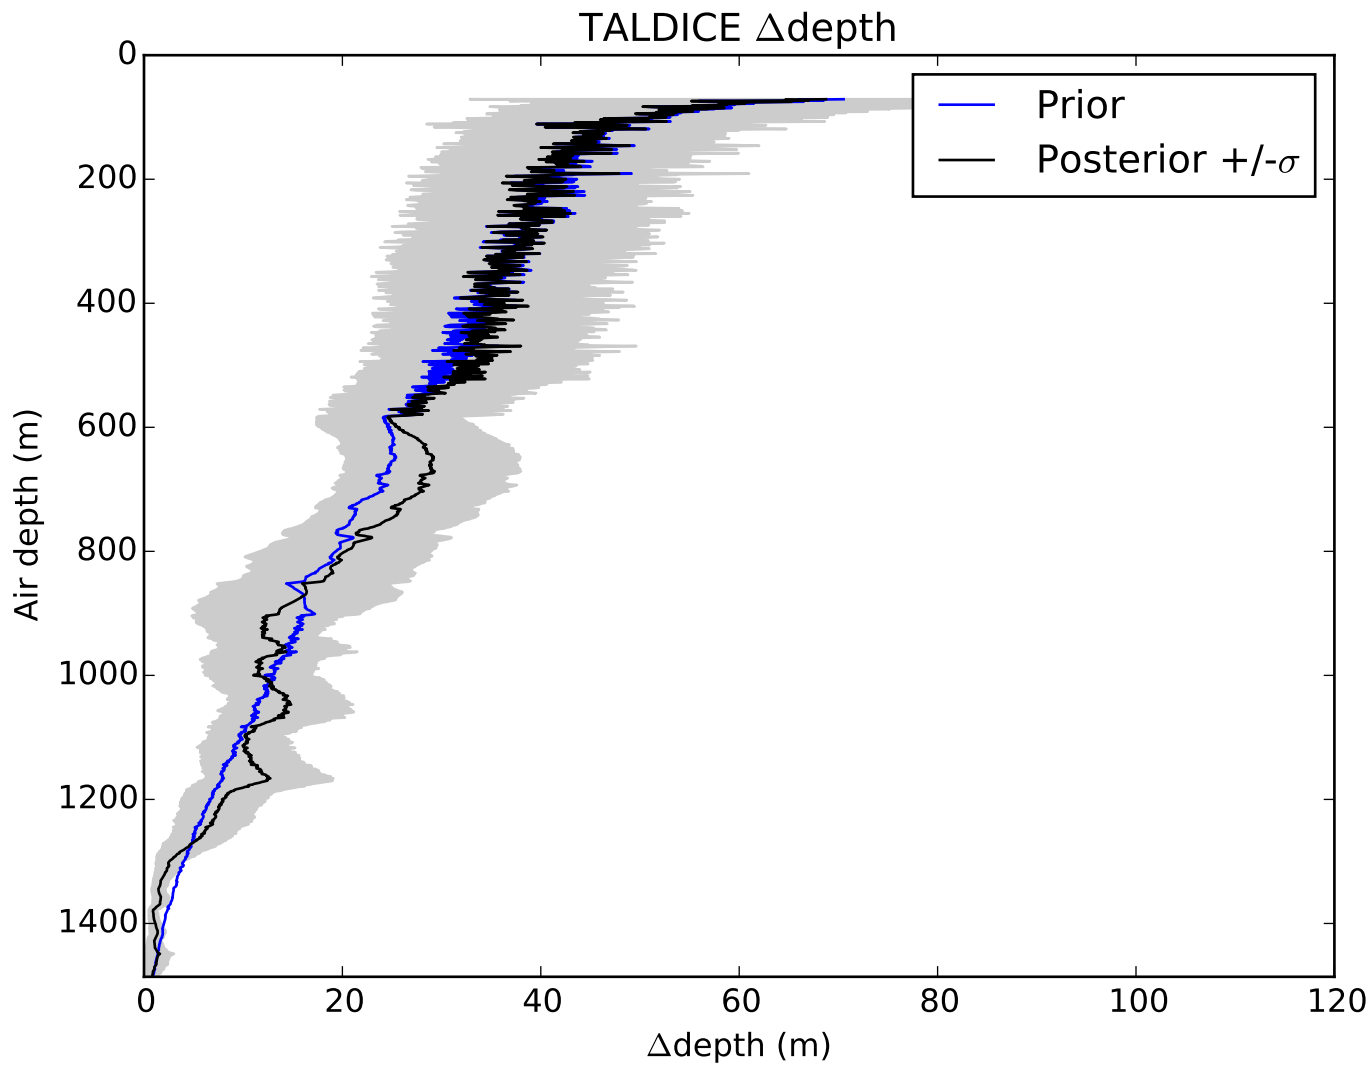

Supplement: Supplementary file 77 [file gmd-8-1473-2015-supplement.zip]

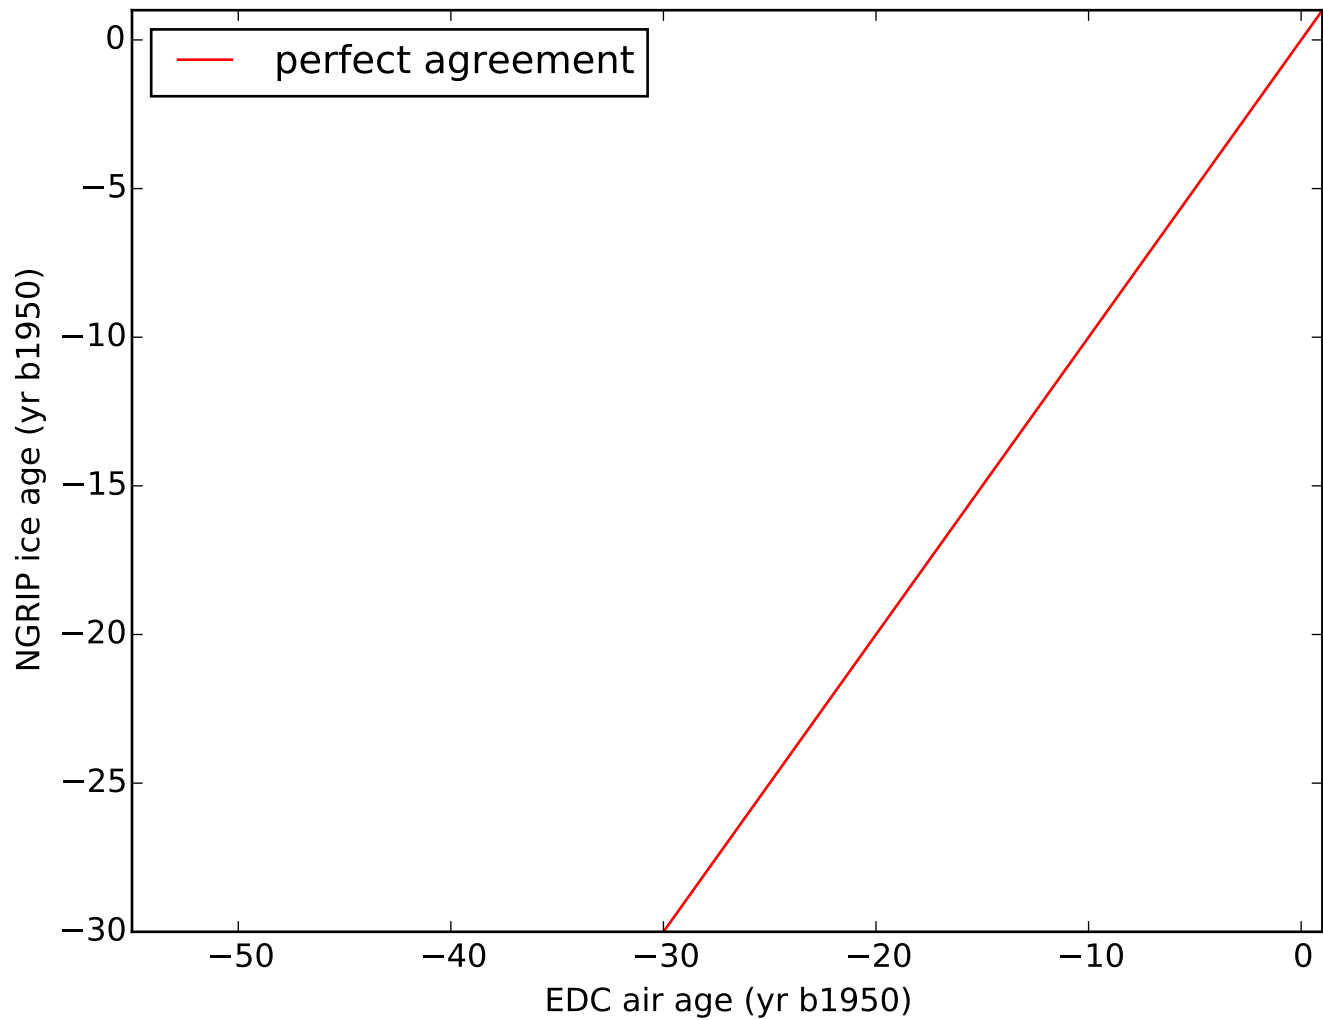

Supplement: Supplementary file 78 [file gmd-8-1473-2015-supplement.zip]

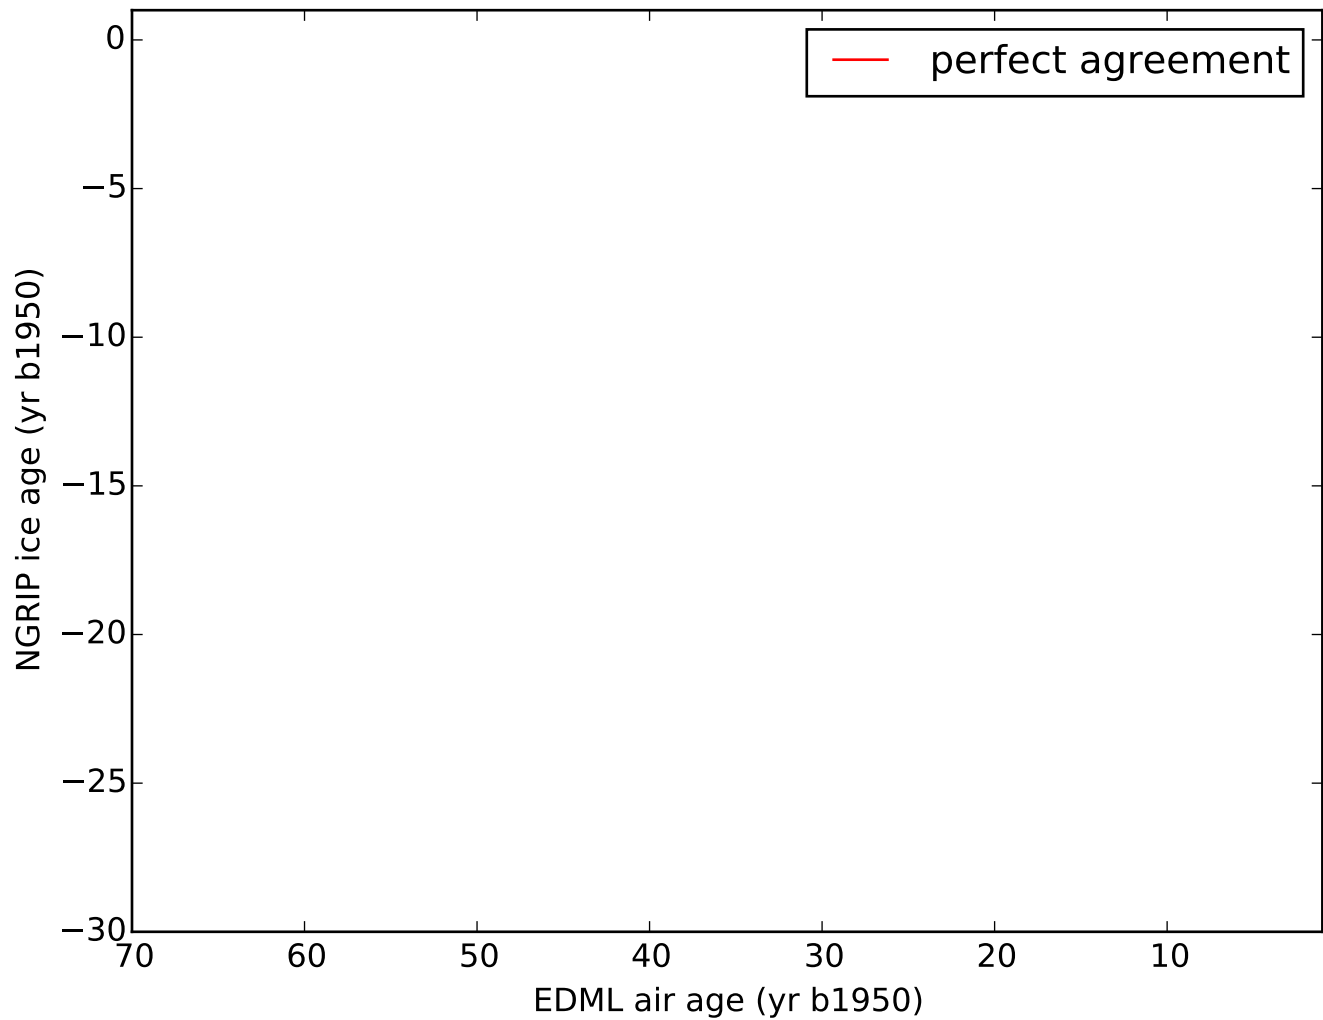

Supplement: Supplementary file 79 [file gmd-8-1473-2015-supplement.zip]

# EDC accumulation

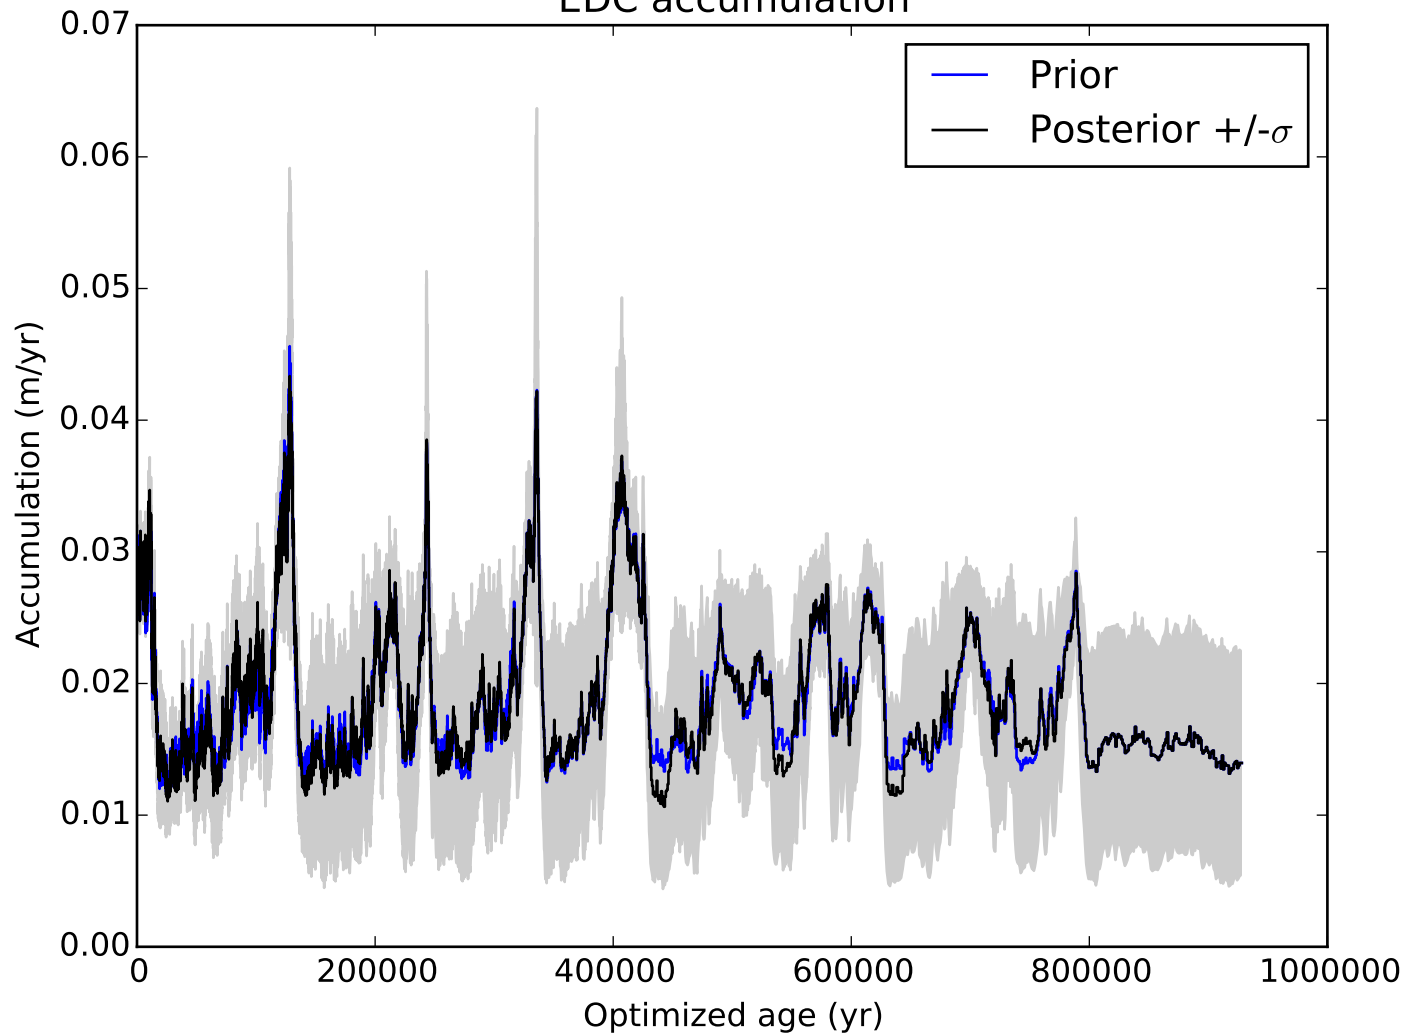

Supplement: Supplementary file 80 [file gmd-8-1473-2015-supplement.zip]

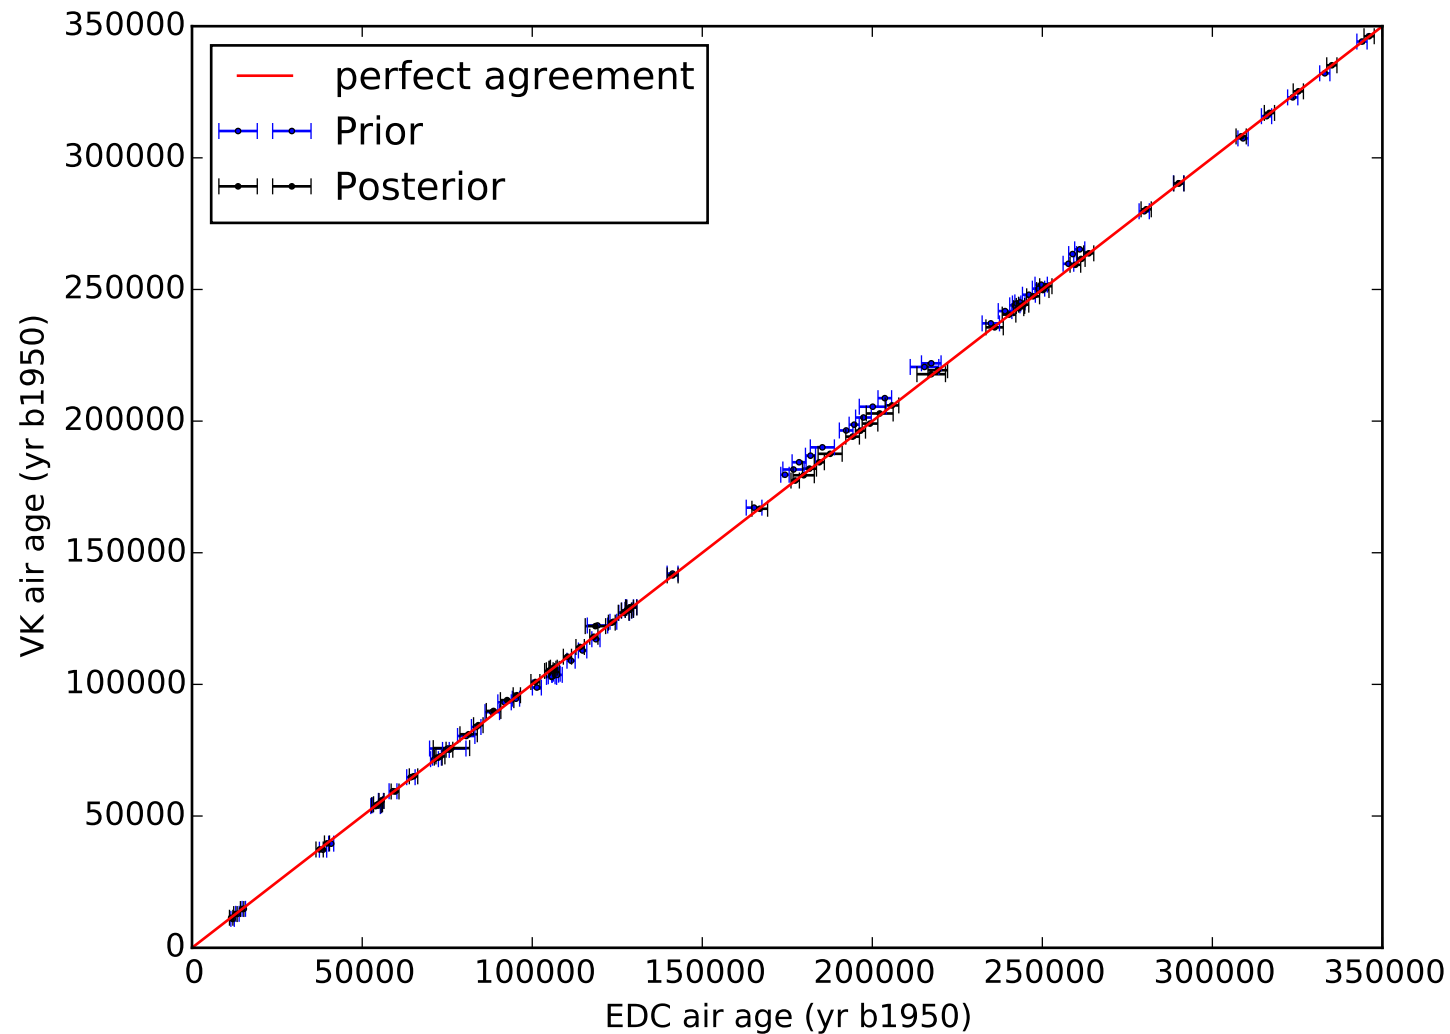

Supplement: Supplementary file 81 [file gmd-8-1473-2015-supplement.zip]

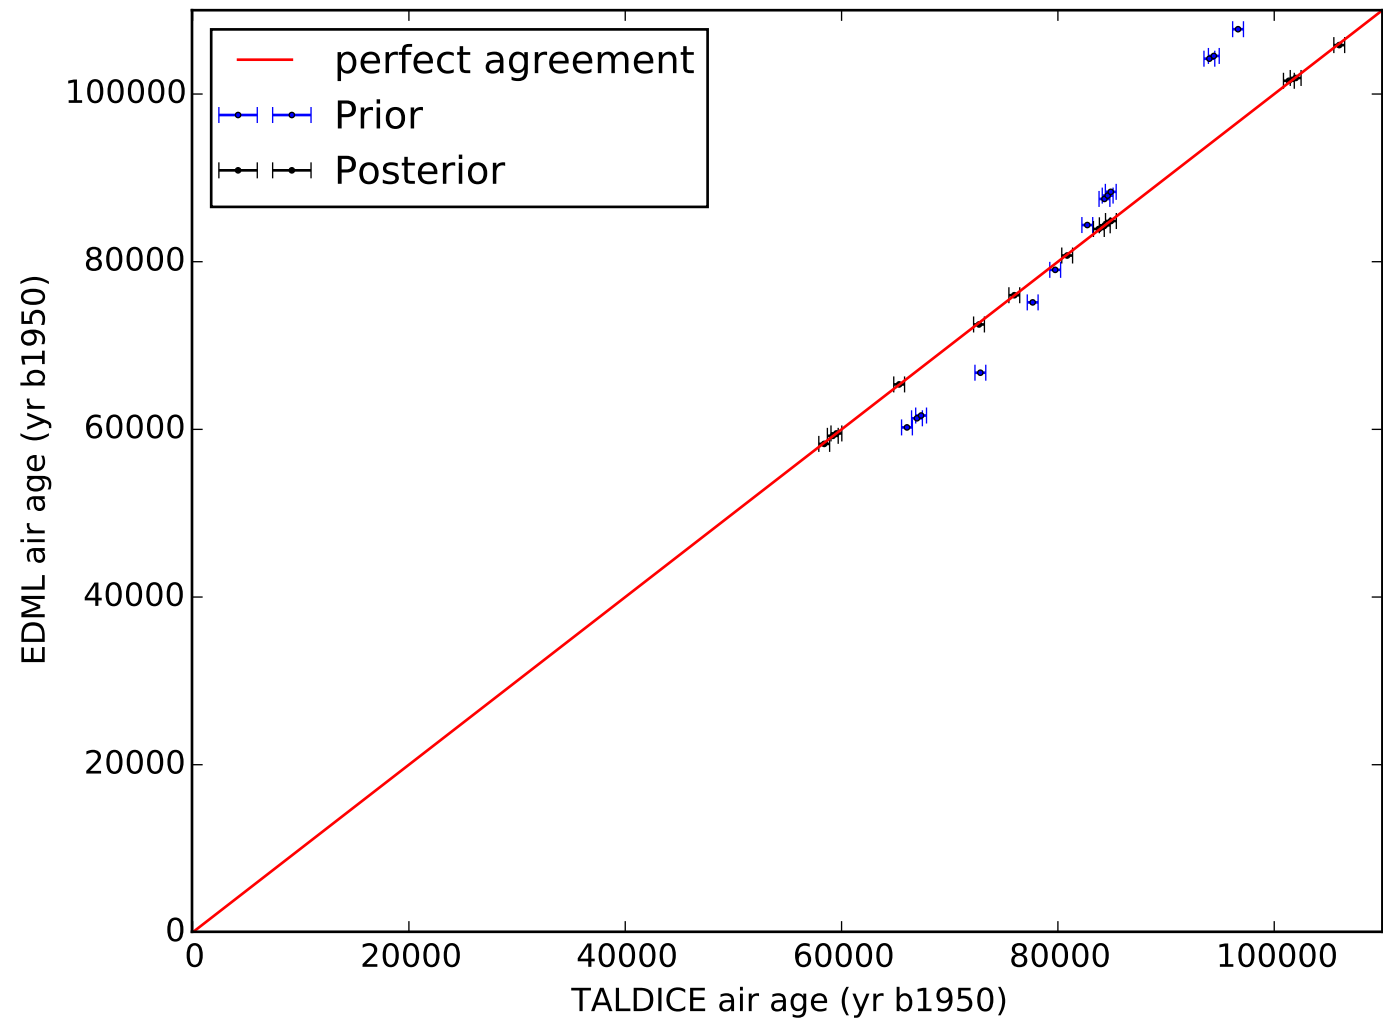

Supplement: Supplementary file 82 [file gmd-8-1473-2015-supplement.zip]

# EDML air age

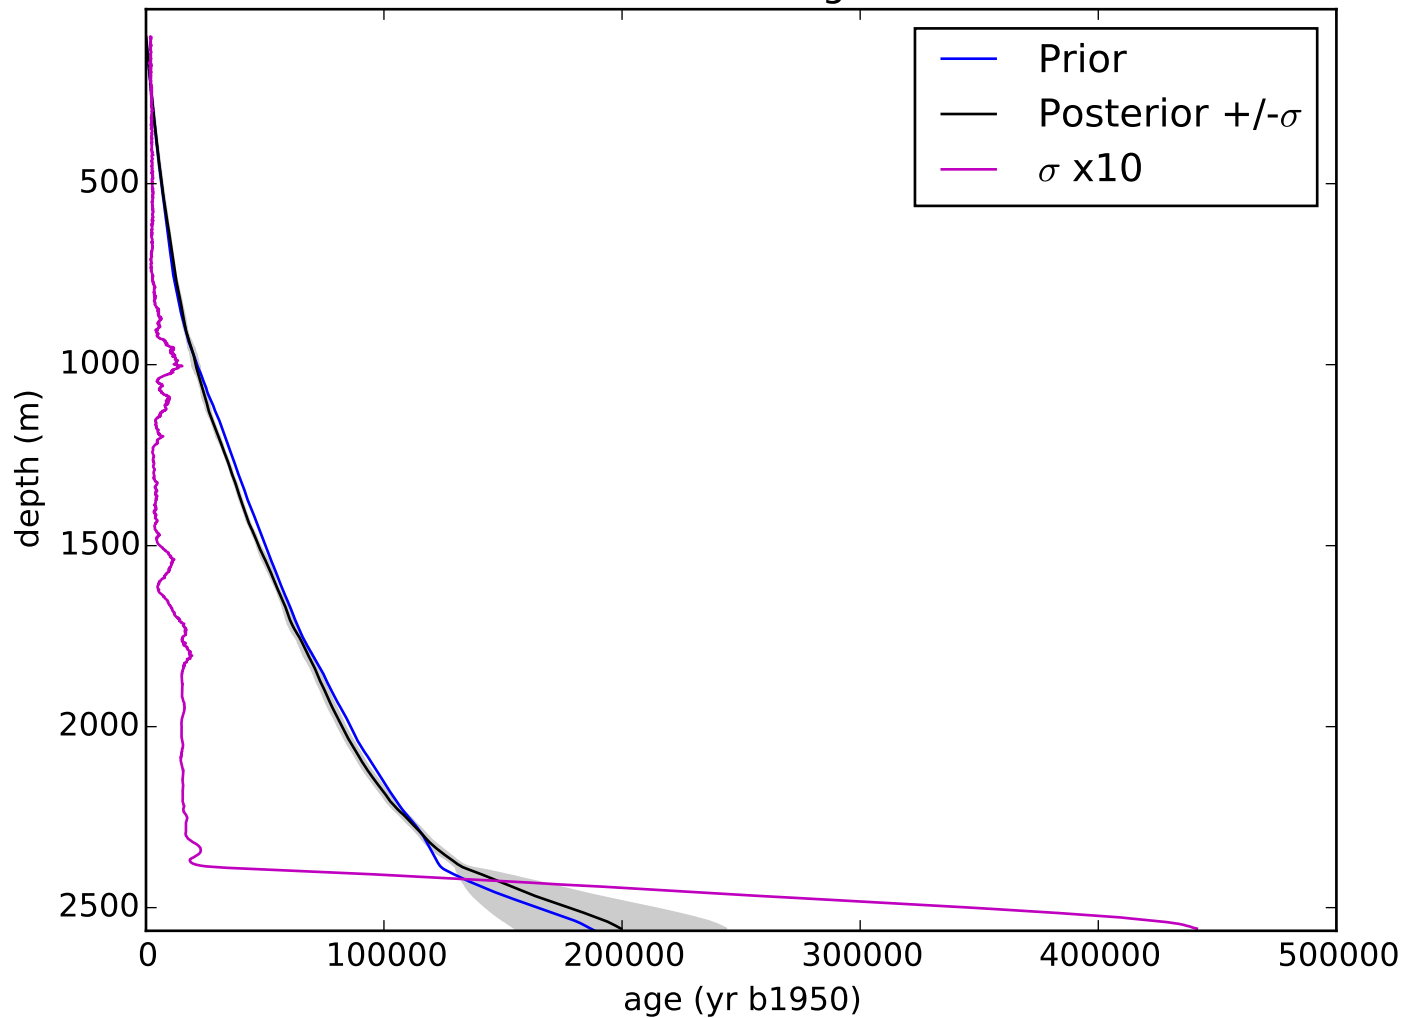

Supplement: Supplementary file 83 [file gmd-8-1473-2015-supplement.zip]

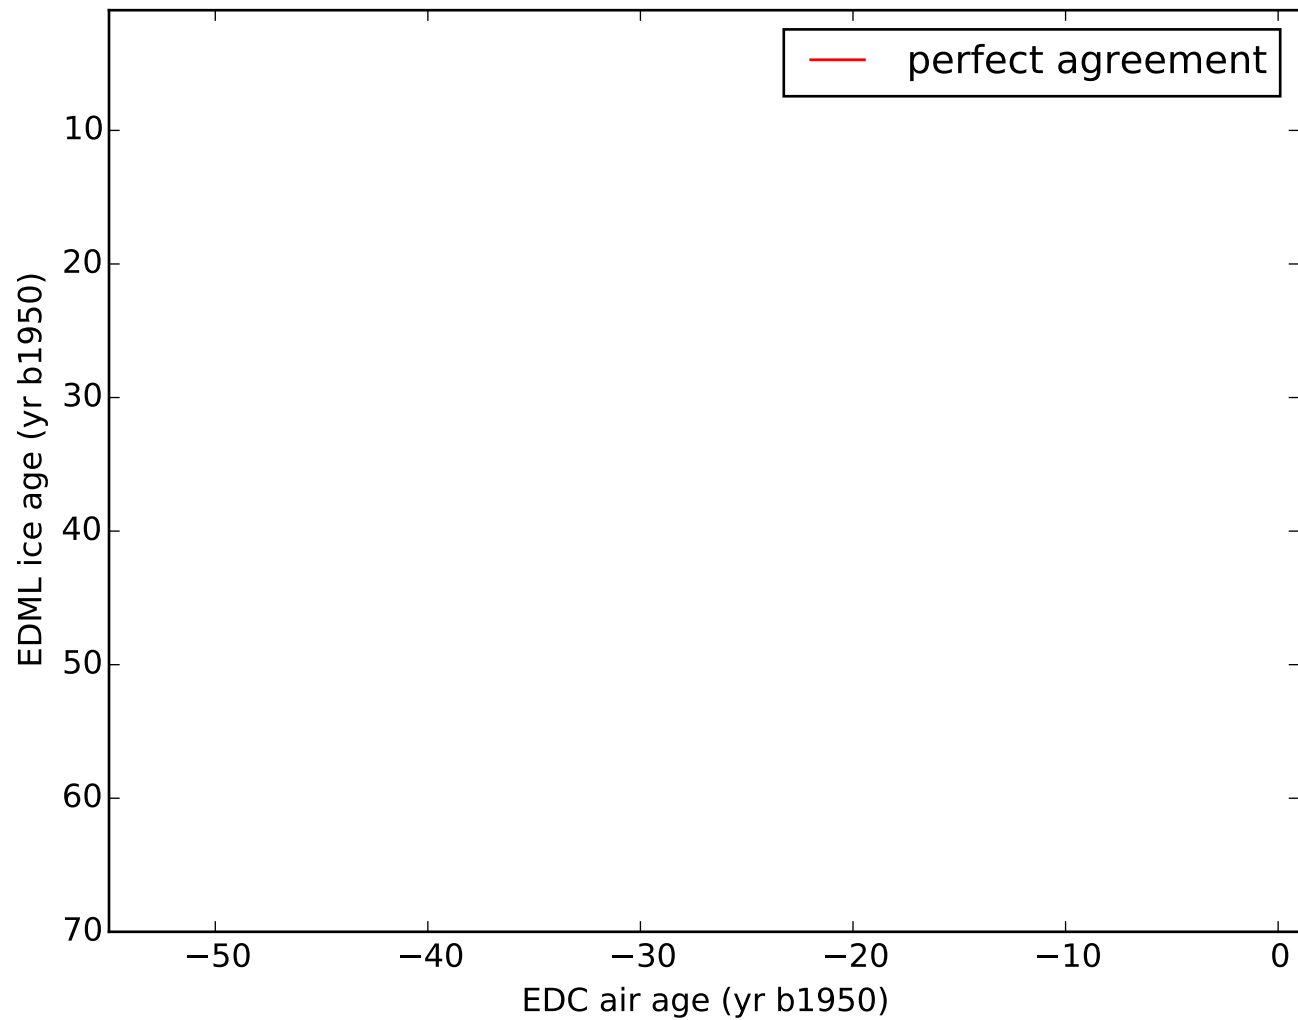

Supplement: Supplementary file 84 [file gmd-8-1473-2015-supplement.zip]

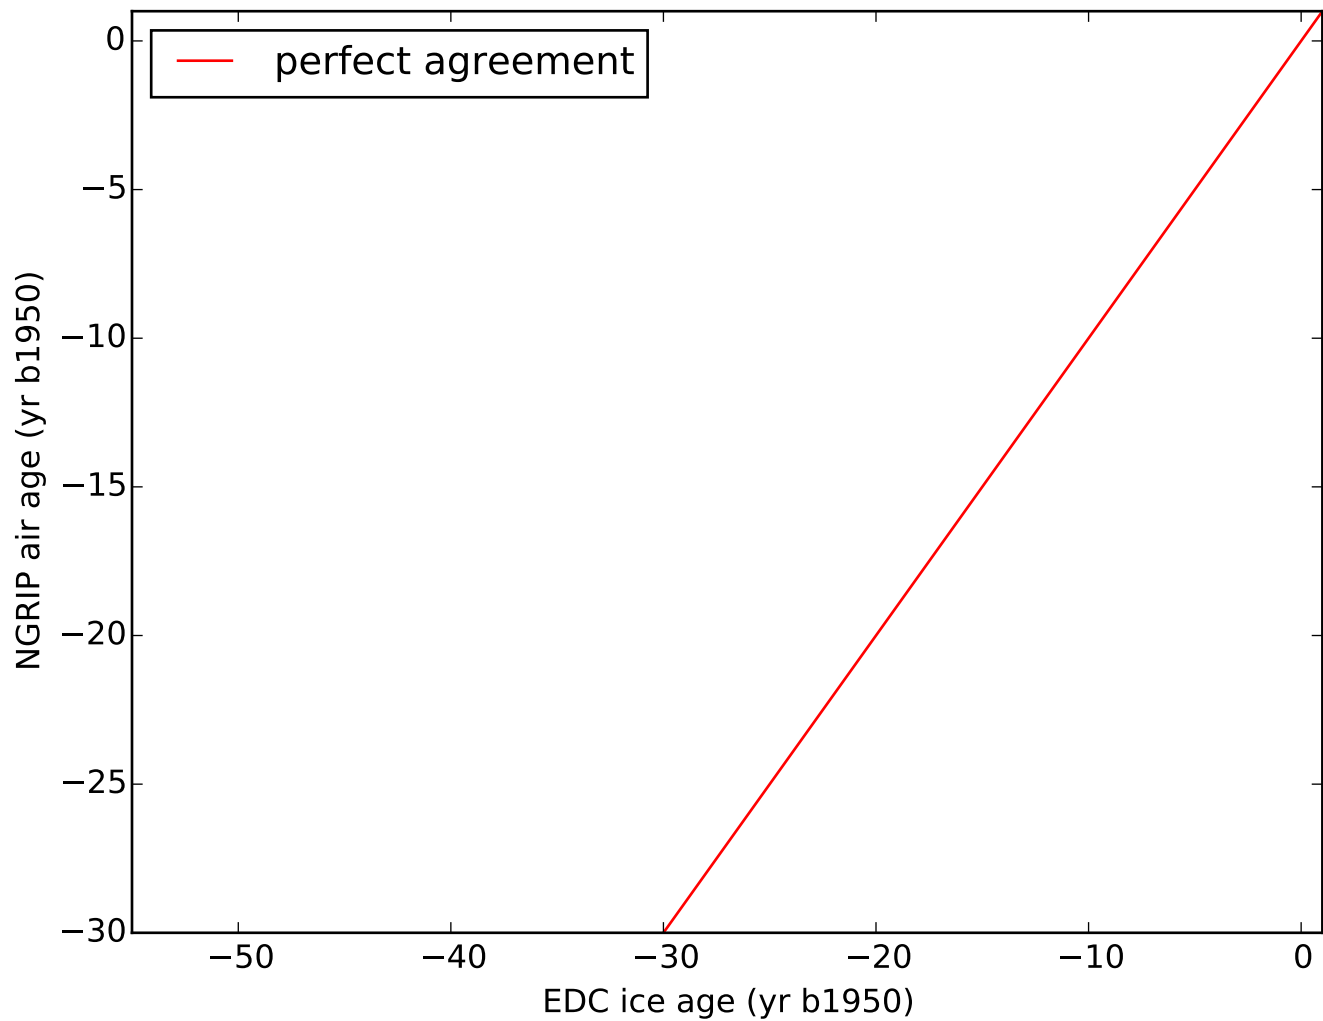

Supplement: Supplementary file 85 [file gmd-8-1473-2015-supplement.zip]
